# Supplementary material for: Gold(i) complexes bearing a PNP-type pincer ligand: photophysical properties and catalytic investigations
Source: Royal Society of Chemistry journal article supplement (doi:10.1039/d2dt02429b), 2022-01-01
Supplement: d2dt02429b1.pdf [file d2dt02429b1.pdf]

Supplementary Information for

## Gold(I) Complexes Bearing a PNP-Type Pincer Ligand: Photophysical Properties and Catalytic Investigations

Martina Casciotti,<sup>a</sup> Guillermo Romo-Islas,<sup>b,c</sup> María Álvarez,<sup>a</sup> Francisco Molina,<sup>a</sup> José María Muñoz-Molina,<sup>\*,a</sup> Tomás R. Belderrain<sup>\*,a</sup> and Laura Rodríguez<sup>\*,b,c</sup>

<sup>a</sup>Laboratorio de Catálisis Homogénea, Unidad Asociada al CSIC, CIQSO-Centro de Investigación en Química Sostenible, Departamento de Química, Universidad de Huelva, 21007, Huelva, Spain

<sup>b</sup>Departament de Química Inorgànica i Orgànica. Secció de Química Inorgànica. Universitat de Barcelona, Martí i Franquès 1-11, 08028 Barcelona, Spain

<sup>c</sup>Institut de Nanociència i Nanotecnologia (IN2UB). Universitat de Barcelona, 08028 Barcelona, Spain

|      |                                                         |     |
|------|---------------------------------------------------------|-----|
| I    | General methods                                         | S2  |
| II   | Synthesis of gold(I) complexes                          | S2  |
| III  | General procedure for catalyst screening                | S6  |
| IV   | Emission spectra                                        | S8  |
| V    | Test for Gold Nanoparticles Catalysis                   | S15 |
| VI   | <sup>31</sup> P NMR studies of stoichiometric reactions | S17 |
| VII  | NMR spectra                                             | S18 |
| VIII | X-RAY data                                              | S25 |

## I. General methods

**General Information:** All air- and moisture-sensitive manipulations were carried out with standard Schlenk techniques under nitrogen atmosphere or in a glovebox (MBRAUN UNILAB). Solvents were purchased from commercial sources, dried by distillation under nitrogen atmosphere using the suitable drying agent and deoxygenated immediately before their use. Reagents were acquired from suppliers and used without any further purification. The DPPMPY ligand,<sup>1</sup> [AuCl(tht)],<sup>2</sup> and (Dppm)Au<sub>2</sub>Br<sub>2</sub><sup>3</sup> were synthesized according to literature procedures. NMR spectra were recorded on the Bruker Avance 400 and 500 MHz spectrometers as solutions at 298 K and referenced to residual solvent peaks. High-Resolution Mass Spectroscopy (HRMS) experiments were carried out on a Fisons VG Quatro spectrometer.

**General procedure for emission catalyst:** Vinyl benzoic acid (4.90 mg, 33.07 μmol, 1 eq), PhB(OH)<sub>2</sub> (8.1 mg, 66.40 μmol, 2 eq) and Selectfluor® (17.7 mg, 50 μmol, 1.5 eq) were dissolved in CH<sub>3</sub>CN (10 mL). After stirring for 5 minutes, the relative gold catalyst (0.992 μmol, 0.03 eq) was added and the mixture was heated at 70°C for 24 hrs. One aliquot was taken every hour during the first 8 hours and emission spectra were measured in a Horiba spectrometer with a temperature control fixed at 70°C with a λ<sub>ex</sub>=350 nm. The last measure was taken after 24 hours of reaction with the same conditions as the previous experiments.

## II. Synthesis of gold(I) complexes

### DPPMPY(AuCl)<sub>2</sub>, 1

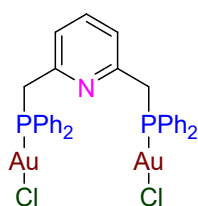

A solution of the DPPMPY ligand (404 mg, 0.85 mmol) in CH<sub>2</sub>Cl<sub>2</sub> (20 mL) was added to a solution of [AuCl(tht)] (576 mg, 1.77 mmol) in CH<sub>2</sub>Cl<sub>2</sub> (20 mL) at room temperature. The reaction mixture was stirred for 1 h. The insoluble colourless precipitate formed was collected by vacuum filtration, washed with CH<sub>2</sub>Cl<sub>2</sub> (10 mL) and vacuum dried to afford the product as a colourless solid (560.0 mg, 70%). <sup>1</sup>H (500 MHz, CD<sub>2</sub>Cl<sub>2</sub>): δ 7.78 (dd, <sup>3</sup>J<sub>HP</sub> = 12.9, <sup>3</sup>J<sub>HH</sub> = 7.7, 8H, CH<sub>Phphosphane</sub>), 7.51 (m, 13H, CH<sub>Phphosphane</sub> + CH<sub>py</sub>), 7.03 (d, <sup>3</sup>J<sub>HH</sub> = 7.7, 2H, CH<sub>py</sub>), 4.04 (d, <sup>2</sup>J<sub>HP</sub> = 12.7, 4H, CH<sub>2</sub>P). <sup>13</sup>C{<sup>1</sup>H} (125 MHz, CD<sub>2</sub>Cl<sub>2</sub>): δ 153.4 (br s), 137.6 (br s), 133.5 (d, <sup>2</sup>J<sub>CP</sub> = 14 Hz), 131.8 (br s), 129.4 (s), 129.0 (d, <sup>2</sup>J<sub>CP</sub> = 12

<sup>1</sup> Cochran, B. M.; Michael, F. E. *J. Am. Chem. Soc.* **2008**, *130*, 2786-2792.

<sup>2</sup> Uson, R.; Laguna, A.; Laguna, M. *Inorg. Synth.* **1989**, *26*, 85-91.

<sup>3</sup> Schneider, D.; Schier, A.; Schmidbaur, H. *Dalton Trans.* **2004**, 1995-2005.

Hz), 128.9 (br s), 122.9 (t,  $^3J_{CP} = 4$  Hz), 37.1 (d,  $^1J_{CP} = 36$  Hz).  $^{31}\text{P}\{^1\text{H}\}$  (202 MHz,  $\text{CD}_2\text{Cl}_2$ ):  $\delta$  33.4 (s). HRMS  $m/z$ : 939.133  $[\text{M} + \text{H}]^+$ , 904.060  $[\text{M} - \text{Cl}]^+$ , 672.128  $[\text{M} - \text{Au} - 2 \text{Cl}]^+$ , 1816.194  $[2\text{M} - 2 \text{Cl}]^+$ .

### DPPMPY(AuBr)<sub>2</sub>, 2

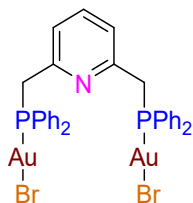

A solution of KBr (131 mg, 1.1 mmol) in  $\text{H}_2\text{O}$  (15 ml) was added to a suspension of complex **1** (100 mg, 0.110 mmol) in  $\text{CH}_2\text{Cl}_2$  (20 ml). The reaction mixture was stirred for 3 h. The aqueous phase was then separated from the organic phase and extracted three times with 5 ml portions of  $\text{CH}_2\text{Cl}_2$ . The combined organic phases were washed three times with 5 ml portions of water and dried over  $\text{MgSO}_4$ . The solvent was reduced under vacuum to approximately 2 ml. A colourless precipitate was formed by the addition of 50 ml of pentane. After filtration, the solid was dried under vacuum. The product was recrystallized using a mixture of dichloromethane and pentane to give a colourless solid (90.0 mg, 82 %).  $^1\text{H}$  NMR (500 MHz,  $\text{CD}_2\text{Cl}_2$ ):  $\delta$  7.78 (dd,  $^3J_{\text{HP}} = 12.8$ ,  $^3J_{\text{HH}} = 7.9$ , 8H,  $\text{CH}_{\text{Phosphane}}$ ), 7.51 (m, 13H,  $\text{CH}_{\text{Phosphane}} + \text{CH}_{\text{py}}$ ), 7.00 (d,  $^3J_{\text{HH}} = 7.2$ , 2H,  $\text{CH}_{\text{py}}$ ), 4.09 (d,  $^2J_{\text{HP}} = 12.7$ , 4H,  $\text{CH}_2\text{P}$ ).  $^{13}\text{C}\{^1\text{H}\}$  NMR (125 MHz,  $\text{CD}_2\text{Cl}_2$ ):  $\delta$  153.4 (br s), 137.5 (br s), 133.5 (d,  $^2J_{CP} = 14$  Hz), 131.8 (br s), 129.6 (s), 129.1 (s), 129.0 (d,  $^2J_{CP} = 12$  Hz), 122.8 (br t,  $^3J_{CP} = 4$  Hz), 37.1 (d,  $^1J_{CP} = 36$  Hz).  $^{31}\text{P}\{^1\text{H}\}$  NMR (202 MHz,  $\text{CD}_2\text{Cl}_2$ ):  $\delta$  35.1 (s). HRMS  $m/z$ : 1236.21  $[\text{M} + \text{Au} + \text{H}]$ , 944.09  $[\text{M} - \text{Br}]$ , 672.12  $[\text{M} - 2 \text{Br} - \text{Au}]$ .

### (DPPMPY<sub>2</sub>Au<sub>4</sub>Cl<sub>2</sub>)(SbF<sub>6</sub>)<sub>2</sub>, 3

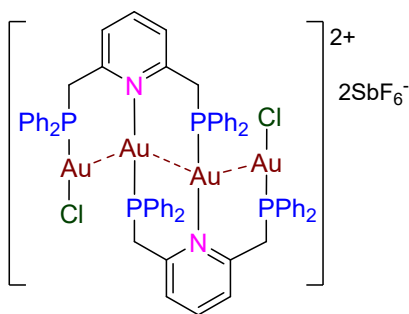

A solution of  $\text{AgSbF}_6$  (18.2 mg, 0.053 mmol) in  $\text{CH}_2\text{Cl}_2$  (2 mL) was added via syringe to a suspension of complex **1** (50 mg, 0.053 mmol) in  $\text{CH}_2\text{Cl}_2$  (4 mL). The resulting mixture was stirred overnight at room temperature. The solution was filtered through Celite to give a yellowish solution. The solvent was reduced under vacuum to approximately 2 ml. Then hexane (10 ml) was added to cause the precipitation of a yellowish solid, which was filtered and dried under high vacuum (65 mg, 55 %).  $^1\text{H}$  NMR (500 MHz,  $\text{CD}_2\text{Cl}_2$ ):  $\delta$  7.94-7.0 (br signals, 42H,  $\text{CH}_{\text{Phosphane}} + \text{CH}_{\text{py}}$ ), 6.87 (br d, 2H,  $\text{CH}_{\text{py}}$ ), 6.62 (br d, 2H,  $\text{CH}_{\text{py}}$ ), 4.62 (br s, 4H,  $\text{CH}_2\text{P}$ ), 4.25 (br s, 4H,  $\text{CH}_2\text{P}$ ).  $^{13}\text{C}\{^1\text{H}\}$  NMR (125 MHz,  $\text{CD}_2\text{Cl}_2$ ):  $\delta$  156.0 (br s), 153.2 (br s), 141.6 (br s), 134.2-132.3 (br signals), 130.2-129.5 (br signals), 127.8 (br s), 127.1 (br s), 126.5 (br signal), 123.7 (br signal), 40.8 (br d,  $^1J_{CP} = 35$  Hz), 40.2 (br d,  $^1J_{CP} = 35$  Hz).  $^{31}\text{P}\{^1\text{H}\}$

NMR (202 MHz, CD<sub>2</sub>Cl<sub>2</sub>): δ 35.0 (s), 28.0 (s). HR-MS (APCI-TOF) *m/z*: 1816.194 [M + H]<sup>+</sup>, 1579.144 [M - AuCl]<sup>+</sup>, 1396.254 [M - 2Au - Cl]<sup>+</sup>, 944.038 [M - 2 AuPhosphane]<sup>+</sup>.

**[DPPMPY<sub>2</sub>Au<sub>4</sub>(MeCN)<sub>2</sub>](SbF<sub>6</sub>)<sub>4</sub>, 4**

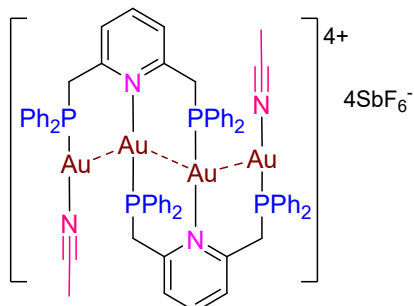

A solution of AgSbF<sub>6</sub> (30.8 mg, 0.089 mmol) in CH<sub>3</sub>CN (2 mL) was added via syringe to a suspension of complex **1** (42.2 mg, 0.132 mmol) in CH<sub>2</sub>Cl<sub>2</sub> (4 mL). The resulting mixture was stirred overnight at room temperature. The solution was filtered through Celite to give a yellowish solution. The solvent was reduced under vacuum to approximately 2 mL. Then hexane (10 mL) was added to cause the precipitation of a yellowish solid, which was filtered and dried under high vacuum (150 mg, 41%). <sup>1</sup>H NMR (500 MHz, CD<sub>2</sub>Cl<sub>2</sub>): δ 7.86-7.16 (br signals, 42H, CH<sub>Phphosphane</sub> + CH<sub>py</sub>), 6.74 (br signal, 2H, CH<sub>py</sub>), 6.61 (br signal, 2H, CH<sub>py</sub>), 4.98-4.74 (br signal, 4H, CH<sub>2</sub>P), 4.48-4.18 (br signal, 4H, CH<sub>2</sub>P), 2.4 (s, 3H, CH<sub>3</sub>, acetonitrile). <sup>13</sup>C{<sup>1</sup>H} NMR (125 MHz, CD<sub>2</sub>Cl<sub>2</sub>): δ 154.6 (br s), 154.0 (br s), 141.4 (br s), 134.2-131.9 (br signals), 130.5-130.0 (br signals), 129.9 (d, <sup>2</sup>J<sub>CP</sub> = 12 Hz), 128.4 (br s), 127.1 (br s), 124.8-123.8 (br signals), 121.0 (br s), 40.1 (d, <sup>1</sup>J<sub>CP</sub> = 38 Hz), 39.2 (br d, <sup>1</sup>J<sub>CP</sub> = 34 Hz), 2.3 (br s) (+ acetone peaks). <sup>31</sup>P{<sup>1</sup>H} NMR (202 MHz, CD<sub>2</sub>Cl<sub>2</sub>): δ 30.4 (br s), 25.6 (br s). HRMS *m/z*: 1073.17 [M - AuPhosphane]<sup>+</sup>, 895.039 [M - Au<sub>2</sub>Phosphane + Na]<sup>+</sup>.

**(DPPMPY<sub>2</sub>Au<sub>4</sub>Cl<sub>2</sub>)(BF<sub>4</sub>)<sub>2</sub>, 5**

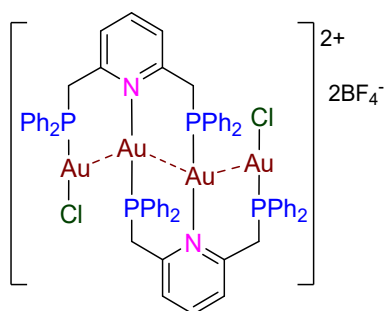

A mixture of complex **1** (100 mg, 0.110 mmol) and AgBF<sub>4</sub> (22 mg, 0.110 mmol) in CHCl<sub>3</sub> (5 mL) was stirred overnight at 80 °C. The volatiles were removed under high vacuum. The residue was dissolved in CH<sub>2</sub>Cl<sub>2</sub> and filtered through a pad of Celite to give a yellowish solution. The solution was concentrated to 2 mL volume and then hexane (20 mL) was added to cause the precipitation of a yellowish solid, which was filtered off and dried under high vacuum (60 mg, 79%). <sup>1</sup>H NMR (500 MHz, CD<sub>2</sub>Cl<sub>2</sub>): δ 8.09-7.25 (br signals, 40H, CH<sub>Phphosphane</sub> + CH<sub>py</sub>), 7.00-6.85 (br signal, 6H, CH<sub>py</sub>), 6.78 (br d, 2H, CH<sub>py</sub>), 4.85-4.18 (br signals, 8H, CH<sub>2</sub>P). <sup>13</sup>C{<sup>1</sup>H} NMR (125 MHz, CDCl<sub>3</sub>): δ 156.0 (br s), 153.6 (br s), 141.5 (br s), 134.5-132.5 (br signals), 129.4-130.4 (br signals), 127.9 (br s), 127.4

(br s), 126.9 (br s), 126.3 (br s), 124.5 (br s), 124.0 (br s), 123.4 (br s), 123.0 (br s), (d,  $^2J_{CP} = 12$  Hz), 41.1 (d,  $^1J_{CP} = 36$  Hz), 40.0 (d,  $^1J_{CP} = 35$  Hz).  $^{31}\text{P}\{^1\text{H}\}$  NMR (202 MHz,  $\text{CD}_2\text{Cl}_2$ ):  $\delta$  33.8 (br s), 29.1 (br s). HRMS  $m/z$ : 1816.194  $[\text{M} + \text{H}]^+$ , 1796.58  $[\text{M} - \text{Cl} + \text{Na}]^+$ , 1593.226  $[\text{M} - \text{AuCl} + \text{NH}_4]^+$ , 944.038  $[\text{M} - 2 \text{ AuPhosphane}]^+$ .

**(DPPMPY<sub>2</sub>Au<sub>4</sub>(MeCN)<sub>2</sub>)(BF<sub>4</sub>)<sub>4</sub>, 6**

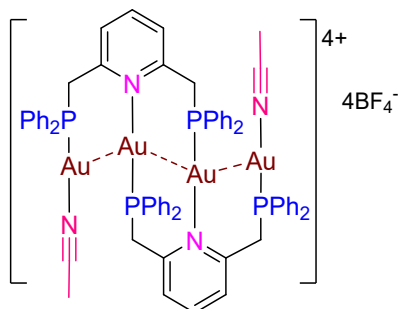

To a suspension of complex 1 (65 mg, 0.069 mmol) in  $\text{CH}_2\text{Cl}_2$  (4 mL) was added a solution of  $\text{AgBF}_4$  (26.9 mg, 0.138 mmol) in  $\text{CH}_3\text{CN}$  (2 mL) via syringe and the resulting mixture was stirred overnight at room temperature. The solution was filtered through a pad of Celite to give a yellowish solution. The volatiles were removed under high vacuum. The solution was concentrated to 2 mL volume and then hexane (10 mL) was added to cause the precipitation of a yellowish solid, which was filtered off and dried under high vacuum (100 mg, 67 %).  $^1\text{H}$  NMR (500 MHz,  $\text{CD}_2\text{Cl}_2$ ):  $\delta$  7.78-7.23 (br signals, 42H,  $\text{CH}_{\text{Phosphane}} + \text{CH}_{\text{py}}$ ), 6.79 (br d,  $^3J_{\text{HH}} = 8$  Hz, 2H,  $\text{CH}_{\text{py}}$ ), 6.56 (br d,  $^3J_{\text{HH}} = 8$  Hz, 2H,  $\text{CH}_{\text{py}}$ ), 5.26 (br dd, 2H,  $\text{CH}_2\text{P}$ ), 5.13 (br dd, 2H,  $\text{CH}_2\text{P}$ ), 4.35 (br t,  $^2J_{\text{HP}} = 13$  Hz,  $^2J_{\text{HH}} = 12$  Hz, 2H,  $\text{CH}_2\text{P}$ ), 4.23 (br t,  $^2J_{\text{HP}} = 13$  Hz,  $^2J_{\text{HH}} = 12$  Hz, 2H,  $\text{CH}_2\text{P}$ ), 2.30 (s, 3H,  $\text{CH}_3$ , acetonitrile).  $^{13}\text{C}\{^1\text{H}\}$  NMR (125 MHz,  $\text{CD}_2\text{Cl}_2$ ):  $\delta$  155.4 (br s), 154.3 (br s), 141.5 (br s), 134.5-133.8 (br signals), 133.5-132.5 (br signals), 131.8 (br d,  $^2J_{CP} = 12$  Hz), 130.2 (br d,  $^2J_{CP} = 12$  Hz), 129.9 (br d,  $^2J_{CP} = 12$  Hz), 128.1 (br s), 127.2 (br s), 126.7 (br s), 126.5 (br s), 125.1 (br s), 124.6 (br s), 124.3 (br s), 123.7 (br s), 120.6 (br s), 40.0 (d,  $^1J_{CP} = 40$  Hz), 38.6 (br d,  $^1J_{CP} = 33$  Hz), 2.5 (br s).  $^{31}\text{P}\{^1\text{H}\}$  NMR (202 MHz,  $\text{CD}_2\text{Cl}_2$ ):  $\delta$  30.9 (br s), 26.0 (br s). HR-MS (APCI-TOF)  $m/z$ : 1816.193  $[\text{M} + \text{Na} + \text{NH}_4]^+$ , 1564.206  $[\text{M} - \text{Au} + \text{Na}]^+$ , 1186.221  $[\text{M} - 3 \text{ Au} + \text{Na} + \text{NH}_4]^+$ , 895.095  $[\text{M} - 2 \text{ AuPhosphane} + \text{Na}]^+$ .

0

**(DPPMPY<sub>2</sub>Au<sub>4</sub>Br<sub>2</sub>)(BF<sub>4</sub>)<sub>2</sub>, 7**

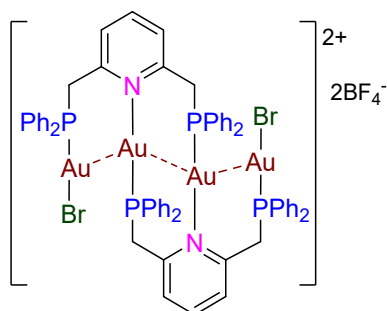

A solution of  $\text{AgBF}_4$  (18.9 mg, 0.097 mmol) in  $\text{CH}_3\text{CN}$  (2 mL) was added to a suspension of complex 2 (100 mg, 0.097 mmol) in  $\text{CH}_2\text{Cl}_2$  (4 mL) and the mixture was stirred overnight. The residue was filtered through a pad of Celite to give a yellowish solution. The solution was concentrated to 2 mL

volume and then hexane (20 ml) was added to cause the precipitation of a yellowish solid, which was filtered off and dried under high vacuum (207 mg, 48%).  $^1\text{H}$  NMR (500 MHz,  $\text{CD}_2\text{Cl}_2$ ):  $\delta$  8.0-7.30 (br signals, 38H,  $\text{CH}_{\text{Phphosphane}} + \text{CH}_{\text{py}}$ ), 6.99 (br signal, 4H,  $\text{CH}_{\text{py}}$ ), 6.90 (br d, 2H,  $\text{CH}_{\text{py}}$ ), 6.75 (br d, 2H,  $\text{CH}_{\text{py}}$ ), 4.87-4.53 (br signals, 4H,  $\text{CH}_2\text{P}$ ), 4.43-4.21 (br signal, 4H,  $\text{CH}_2\text{P}$ ) (+signals corresponding to acetonitrile and hexane).  $^{13}\text{C}\{^1\text{H}\}$  NMR (125 MHz,  $\text{CD}_2\text{Cl}_2$ ):  $\delta$  156.2 (br s), 153.2 (br s), 141.4 (br s), 133.7-132.3 (br signals), 130.5-129.4 (br signals,  $\text{CH}_{\text{Ph}}$ ), 129.3 (br s), 127.9 (br s), 127.1 (br s), 126.5 (br s), 40.9 (br d,  $^1J_{\text{CP}} = 34$  Hz), 40.5 (br d,  $^1J_{\text{CP}} = 35$  Hz) (+signals corresponding to acetonitrile and hexane).  $^{31}\text{P}\{^1\text{H}\}$  NMR (202 MHz,  $\text{CD}_2\text{Cl}_2$ ):  $\delta$  34.9 (br s), 30.2 (br s). HR-MS (APCI-TOF)  $m/z$ : 1816.195  $[\text{M} - \text{Br}]^+$ , 672.127 ( $Z=2$ )  $[\text{M} - 2\text{Au} - 2\text{Br}]^{2+}$ , 1279.21  $[\text{M} - 3\text{Au} - \text{Br} + 2\text{Na}]^+$ , 944.09  $[\text{PNPAu}_2\text{Br}]^+$ .

### III. General procedure for catalyst screening

Vinyl benzoic acid (10.0 mg, 67.5  $\mu\text{mol}$ ) was dissolved in  $\text{CH}_3\text{CN}$  (1.3 mL) with  $\text{PhB}(\text{OH})_2$  (16.46 mg, 145  $\mu\text{mol}$ ) and the relative gold catalyst (3.3  $\mu\text{mol}$ , see table below). After stirring for 5 minutes, Selectfluor<sup>®</sup> (35.86 mg, 101  $\mu\text{mol}$ ) was added and the mixture was heated at 70°C. After 18 hours, the solution was cooled at room temperature. The volatiles were removed under high vacuum and the solution filtered through neutral alumina. The residue was dried under high vacuum. Then 16.5 mg (67.5  $\mu\text{mol}$ ) of triphenylmethane were added. The reaction was monitored by  $^1\text{H}$  NMR for product formation versus the peak at 5.73 ppm (relative to methinic  $\text{CH}$  of the lactone) and 5.59 ppm (relative to the benzylic  $\text{CH}$  of the internal standard).

**Table S1.** Catalyst screening.

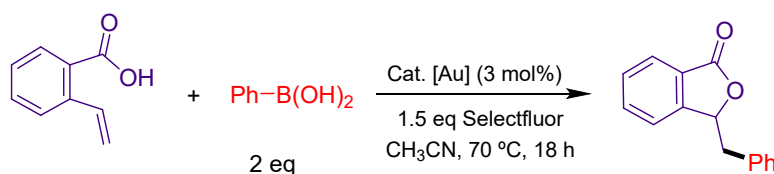

| entry | catalyst | yield (%) <sup>a,b</sup> |
|-------|----------|--------------------------|
| 1     | -        | 20                       |
| 2     |          | 50                       |
| 3     |          | 52                       |

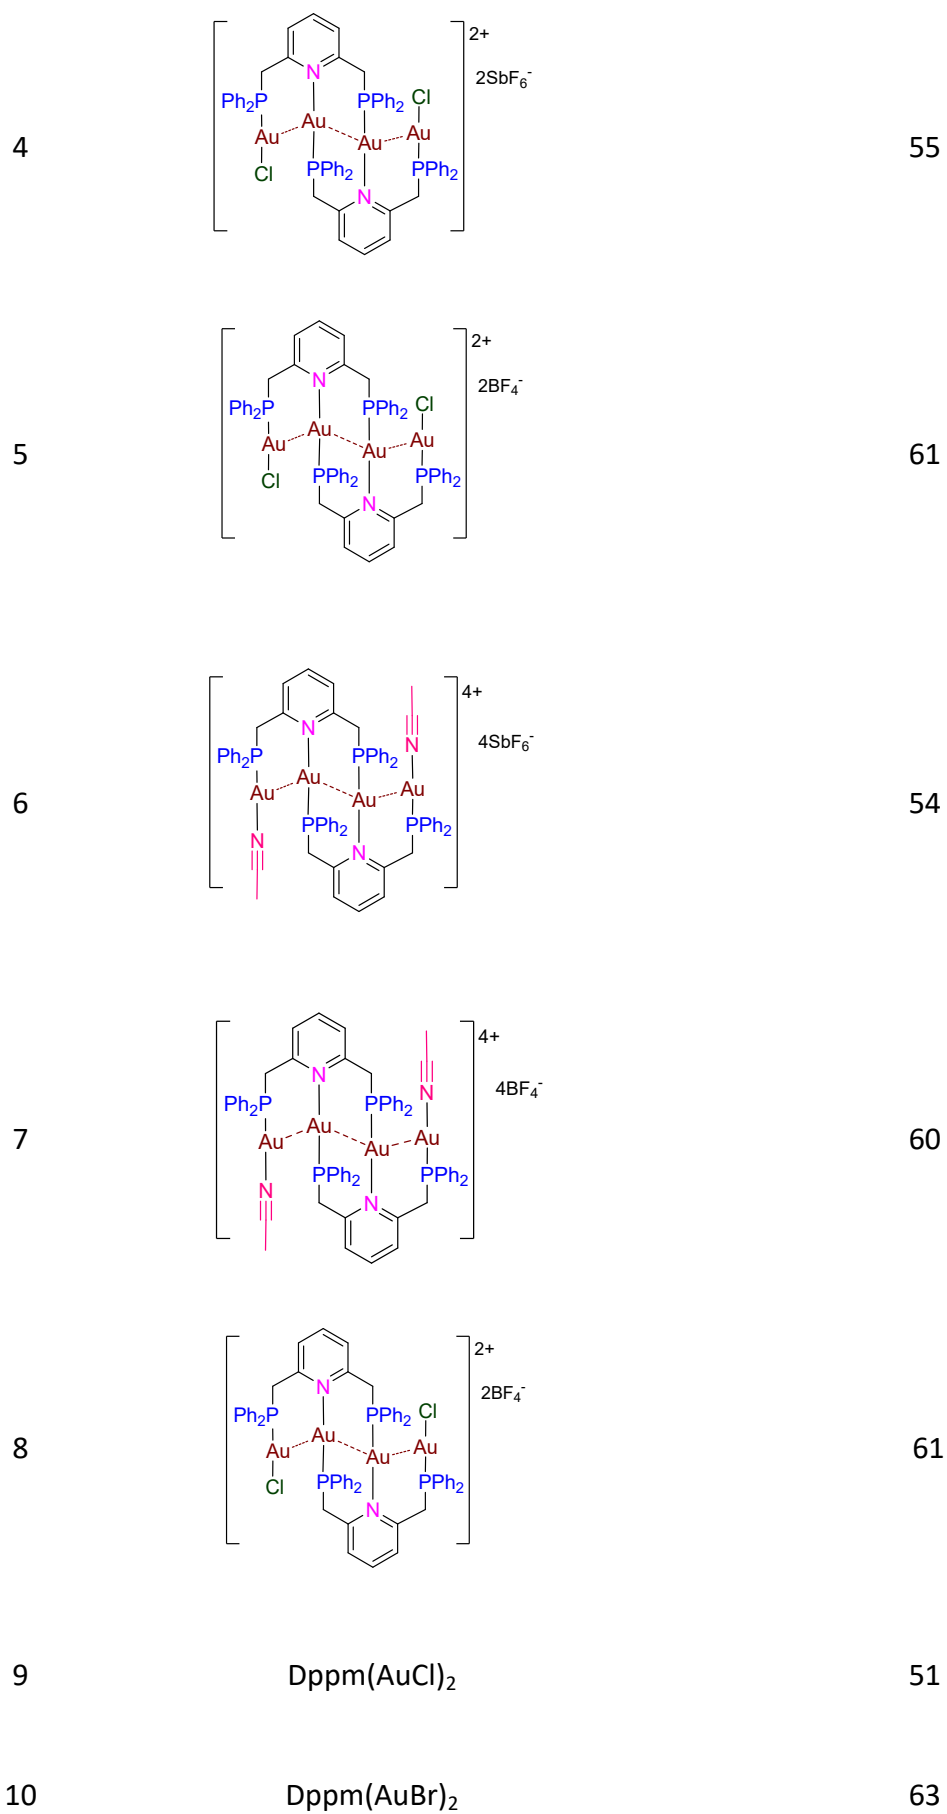

<sup>a</sup>Yields were determined via <sup>1</sup>H NMR analysis versus triphenylmethane as an internal standard.

#### IV. Absorption and Emission spectra

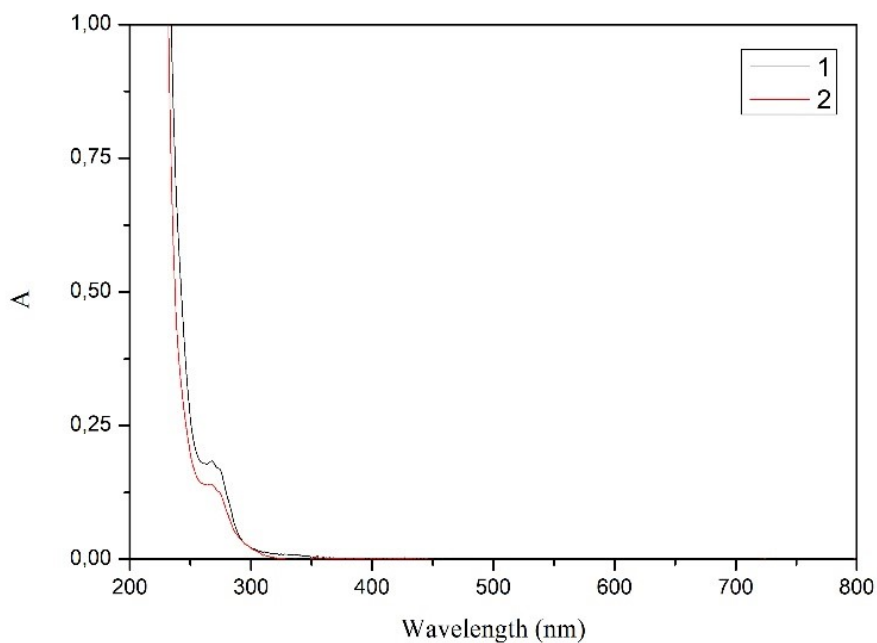

**Figure S1.** Absorption spectra of  $1 \cdot 10^{-5}$  M dichloromethane solutions of dinuclear compounds **1** and **2**.

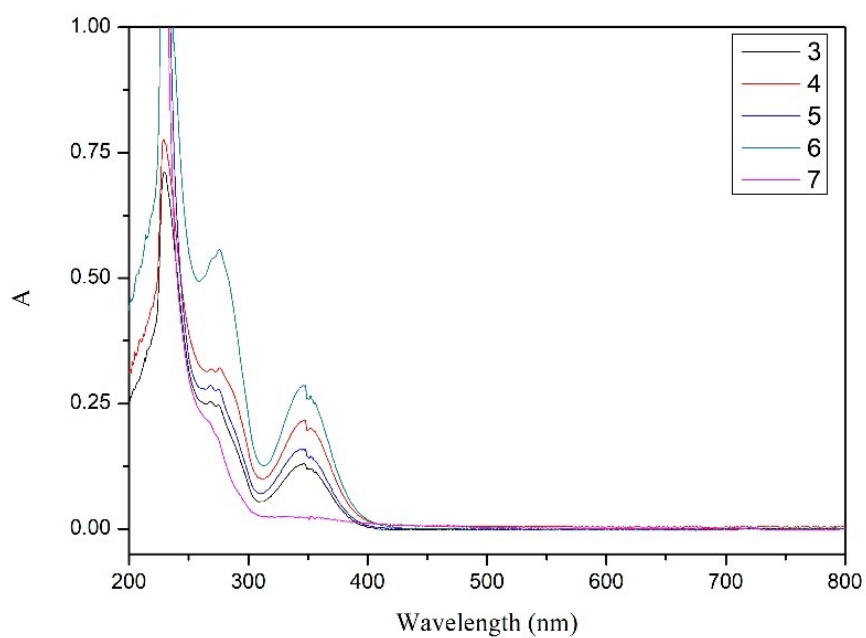

**Figure S2.** Absorption spectra of  $1 \cdot 10^{-5}$  M dichloromethane solutions of tetranuclear compounds **3-7**.



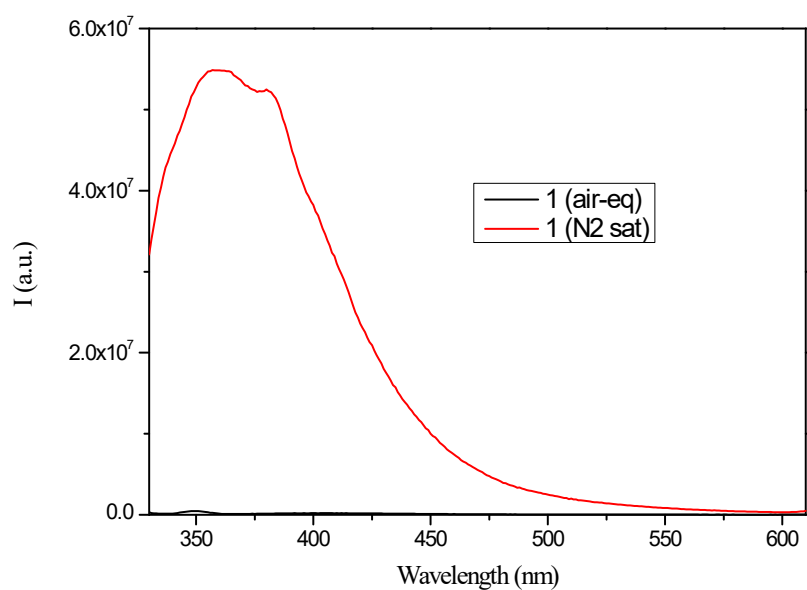

**Figure S3.** Emission spectra of compound **1** in  $1 \cdot 10^{-5}$  M dichloromethane solutions in air-equilibrated and  $N_2$ -saturated samples.  $\lambda_{exc} = 320$  nm.

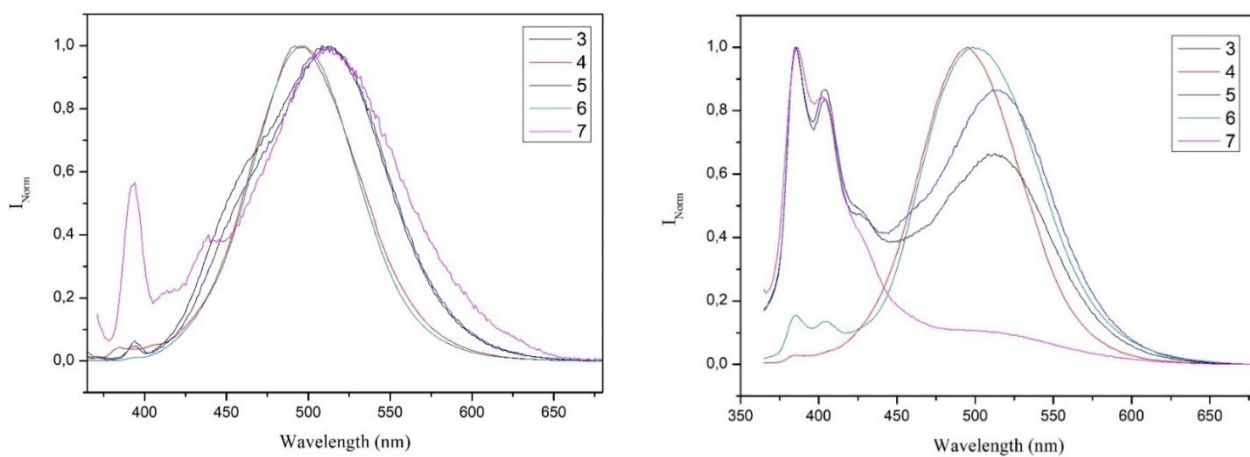

**Figure S4.** Normalized emission spectra of compounds **3-7** in  $1 \cdot 10^{-5}$  M dichloromethane solutions in air-equilibrated (left) and  $N_2$ -saturated (right) samples.  $\lambda_{exc} = 350$  nm.

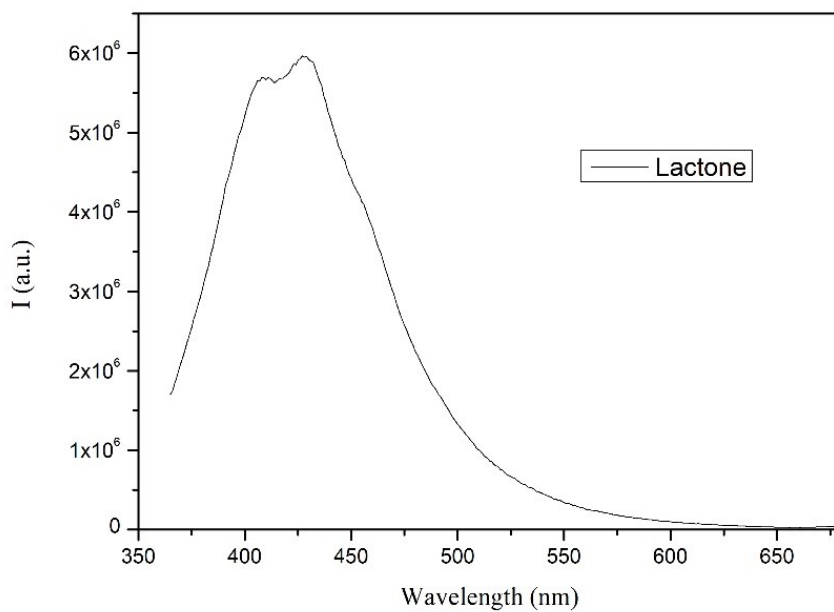

**Figure S5.** Emission spectra of compounds lactone  $10^{-5}$  M in acetonitrile at 70 °C  $\lambda_{exc} = 350$  nm.

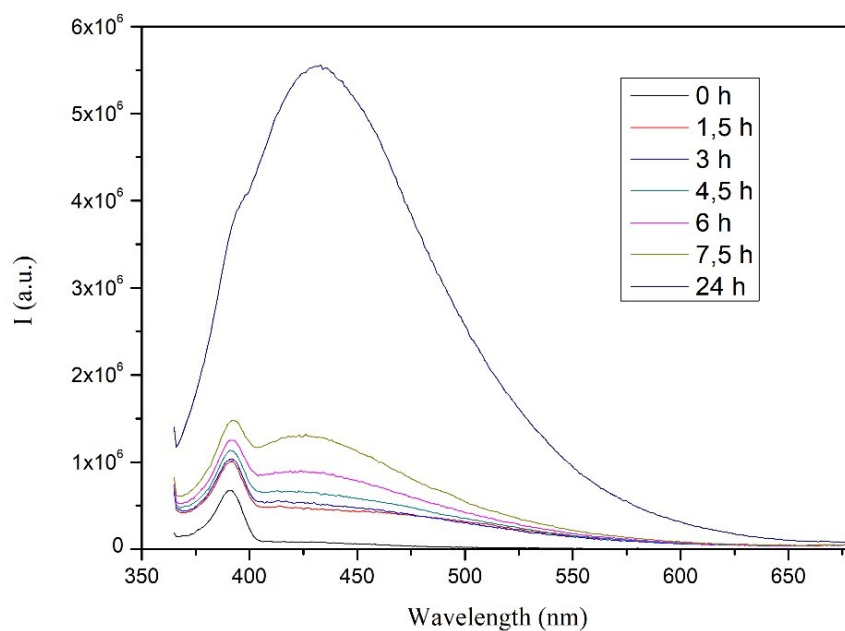

**Figure S6.** Emission spectra of the reaction of the catalytic reaction using **1** as catalyst at different times. Experimental conditions: 70 °C, acetonitrile, SelectF (1.5 eq) and **1** (3%)

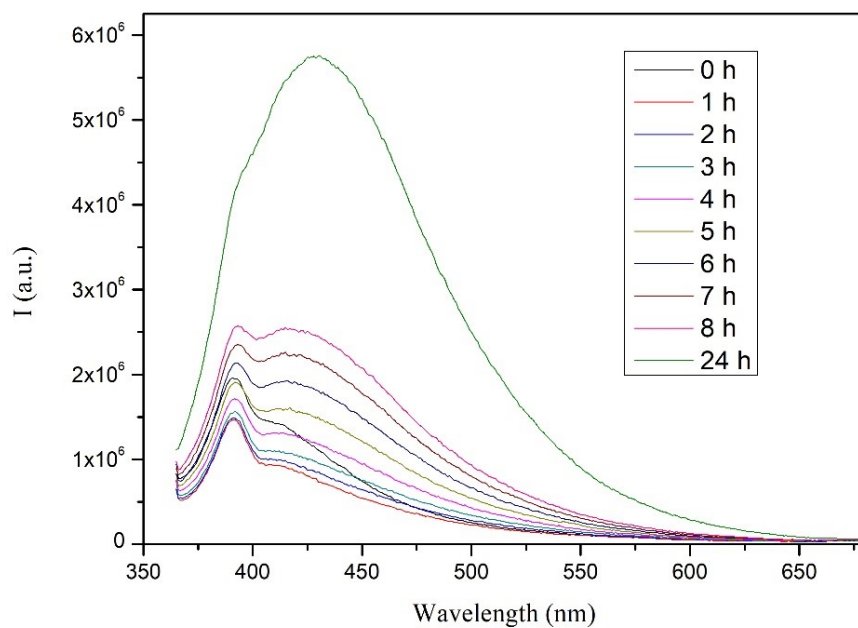

**Figure S7.** Emission spectra of the reaction of the catalytic reaction using **2** as catalyst at different times. Experimental conditions: 70 °C, acetonitrile, SelectF (1.5 eq) and **2** (3%)

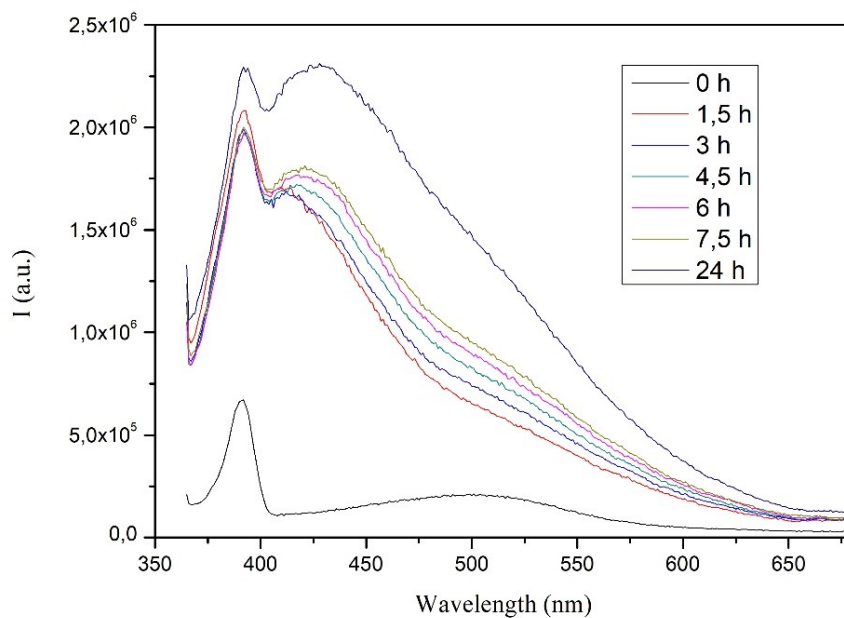

**Figure S8.** Emission spectra of the reaction of the catalytic reaction using **4** as catalyst at different times. Experimental conditions: 70 °C, acetonitrile, SelectF (1.5 eq) and **4** (3%)

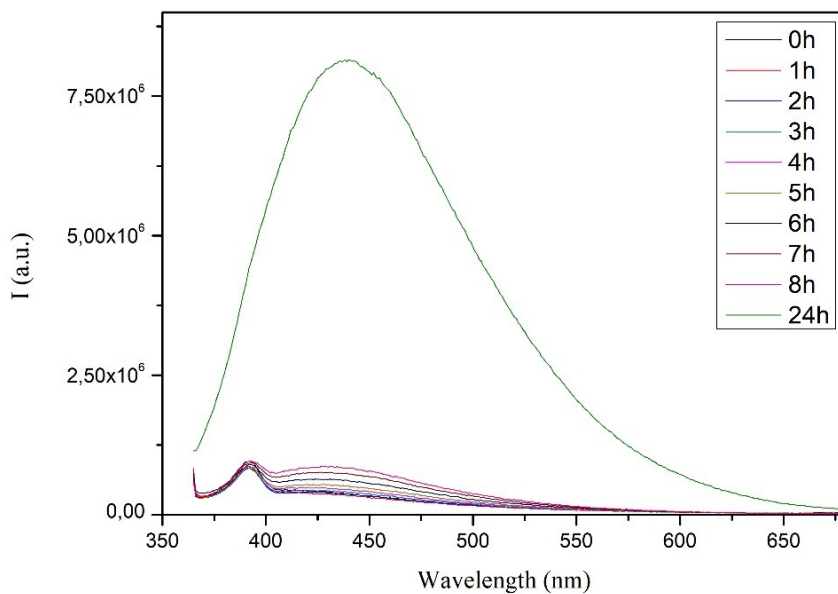

**Figure S9.** Emission spectra of the reaction of the catalytic reaction using **5** as catalyst at different times. Experimental conditions: 70 °C, acetonitrile, SelectF (1.5 eq) and **5** (3%)

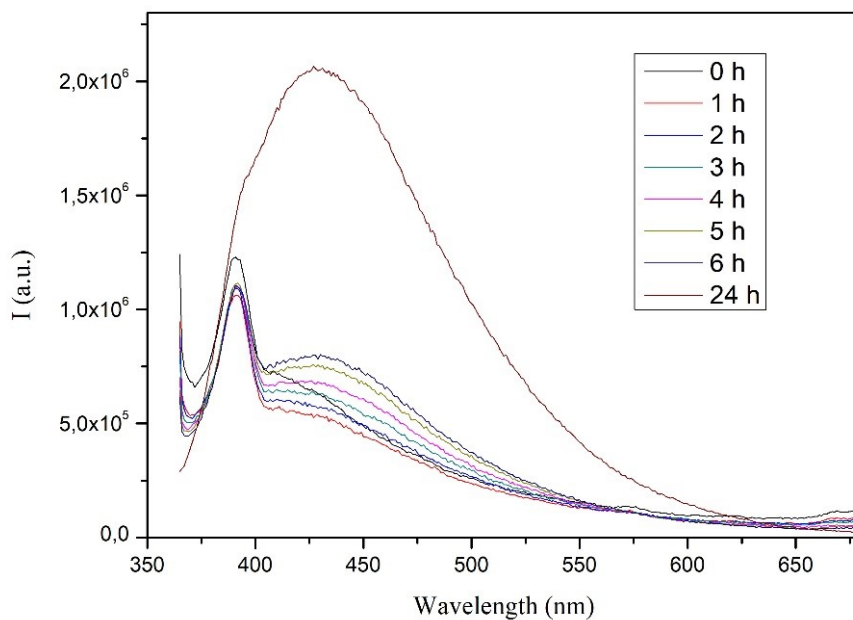

**Figure S10.** Emission spectra of the reaction of the catalytic reaction using **6** as catalyst at different times. Experimental conditions: 70 °C, acetonitrile, SelectF (1.5 eq) and **6** (3%)

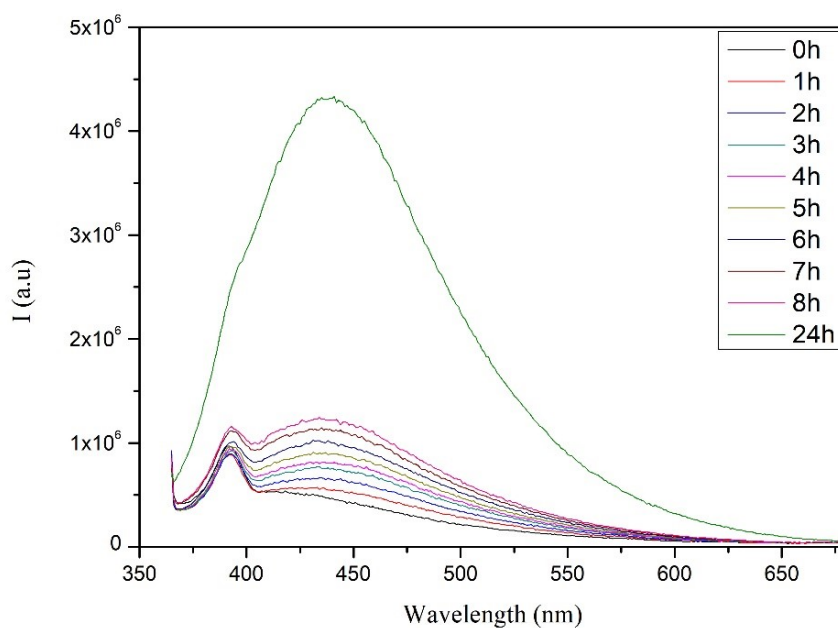

**Figure S11.** Emission spectra of the reaction of the catalytic reaction using **7** as catalyst at different times. Experimental conditions: 70 °C, acetonitrile, SelectF (1.5 eq) and **6** (3%)

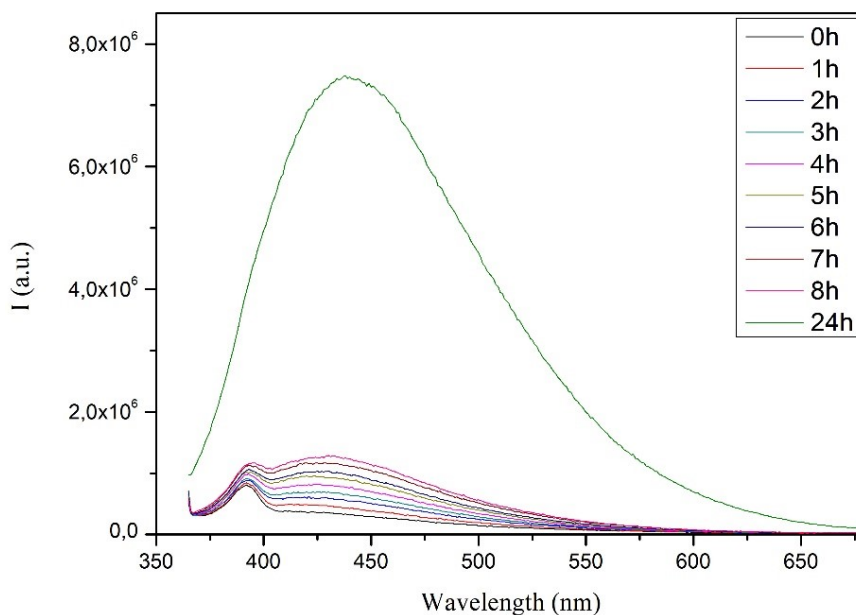

**Figure S12.** Emission spectra of the reaction of the catalytic reaction using  $\text{dppm}(\text{AuCl})_2$  as catalyst at different times. Experimental conditions: 70 °C, acetonitrile, SelectF (1.5 eq) and  $\text{dppm}(\text{AuCl})_2$  (3%)

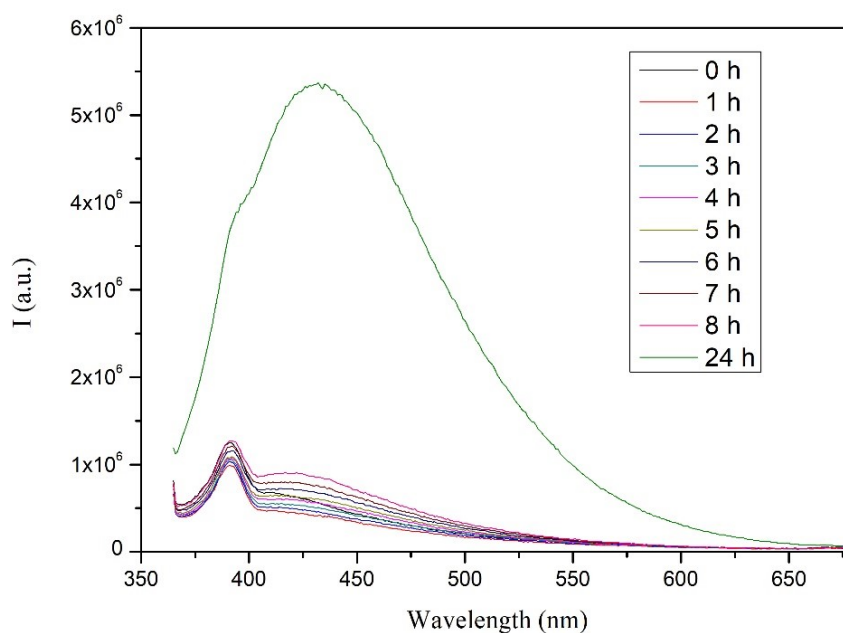

**Figure S13.** Emission spectra of the reaction of the catalytic reaction using  $\text{dppm}(\text{AuBr})_2$  as catalyst at different times. Experimental conditions: 70 °C, acetonitrile, SelectF (1.5 eq) and  $\text{dppm}(\text{AuBr})_2$  (3%)

## V. Mercury test for Gold Nanoparticles

Catalytic reaction

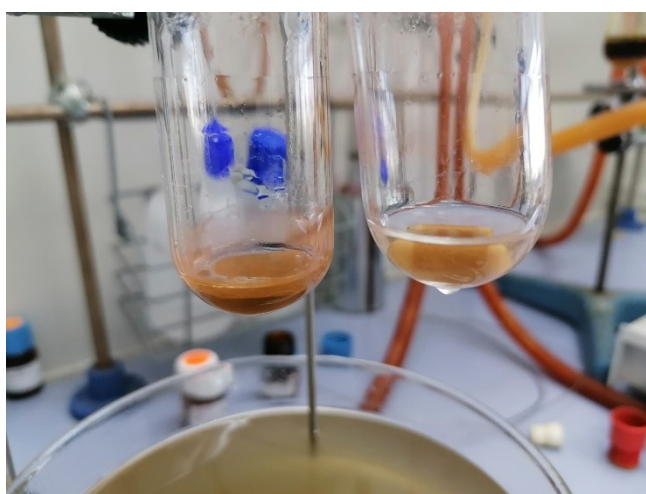

To the left – Reaction mixture of complex **7** in the absence of mercury.; To the right– Reaction mixture of complex **7** in the presence of mercury.

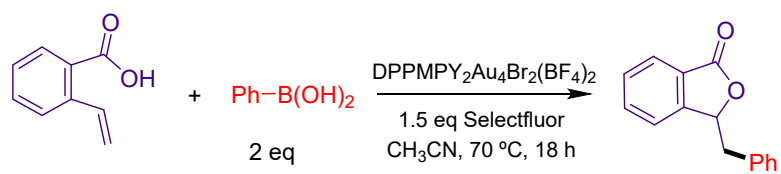

**Table S2.** Mercury test.

|                                                                       | Yield %      |                 |
|-----------------------------------------------------------------------|--------------|-----------------|
|                                                                       | With Mercury | Without Mercury |
| DPPMPyAu <sub>4</sub> Br <sub>2</sub> (BF <sub>4</sub> ) <sub>2</sub> | 53           | 60              |

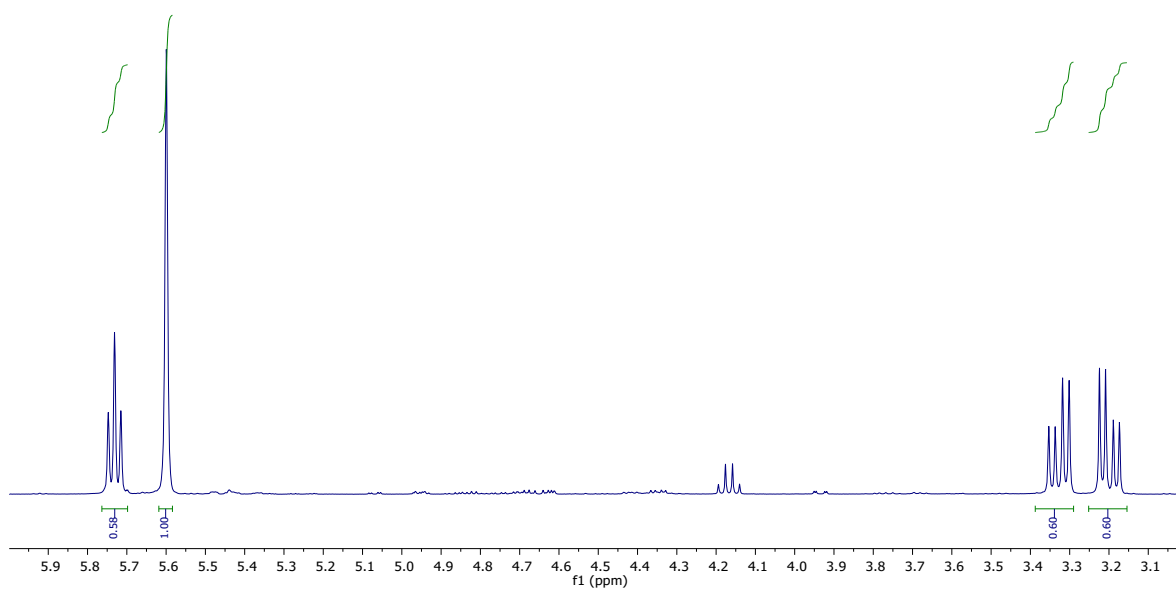

Without mercury.

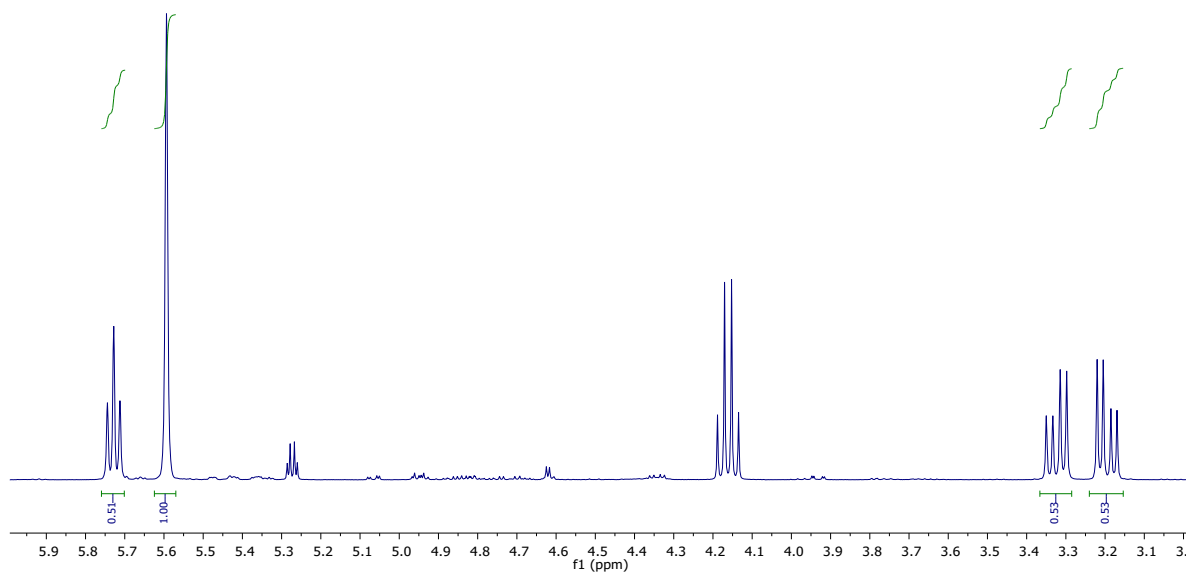

With Mercury.

**Figure S14.**  $^1\text{H}$  NMR spectra of the reaction mixtures

### VI. $^{31}\text{P}$ NMR studies

In two different NMR tubes, Gold catalyst **1** and **7** (1 eq) were dissolved in 0.6 ml of  $\text{CD}_3\text{CN}$  with Selectfluor (10 eq). After one hour at room temperature the mixtures were analyzed by  $^{31}\text{P}\{^1\text{H}\}$  NMR.

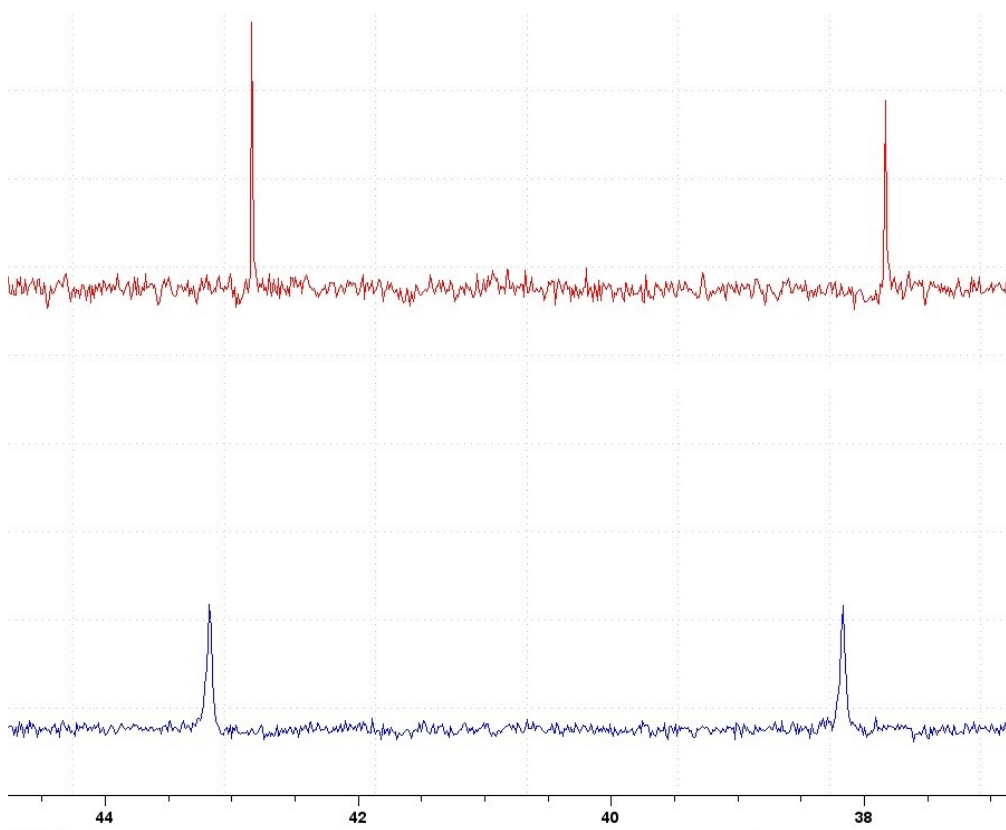

**Figure S15.**  $^{31}\text{P}\{^1\text{H}\}$  NMR spectra of the reaction mixtures

In both cases two peaks with ratio 1:1 were detected. The chemical shift moved to higher frequencies compared to those observed for complexes **1** and **7**. (Section VII)





## VII. NMR spectra

$^1\text{H}$  NMR

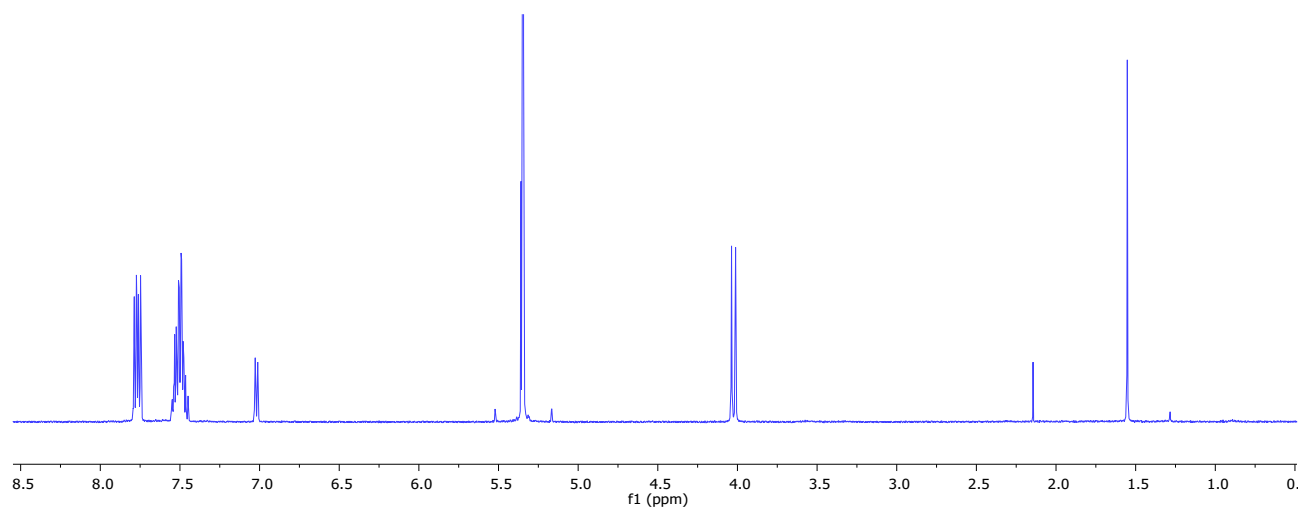

$^{31}\text{P}\{^1\text{H}\}$  NMR

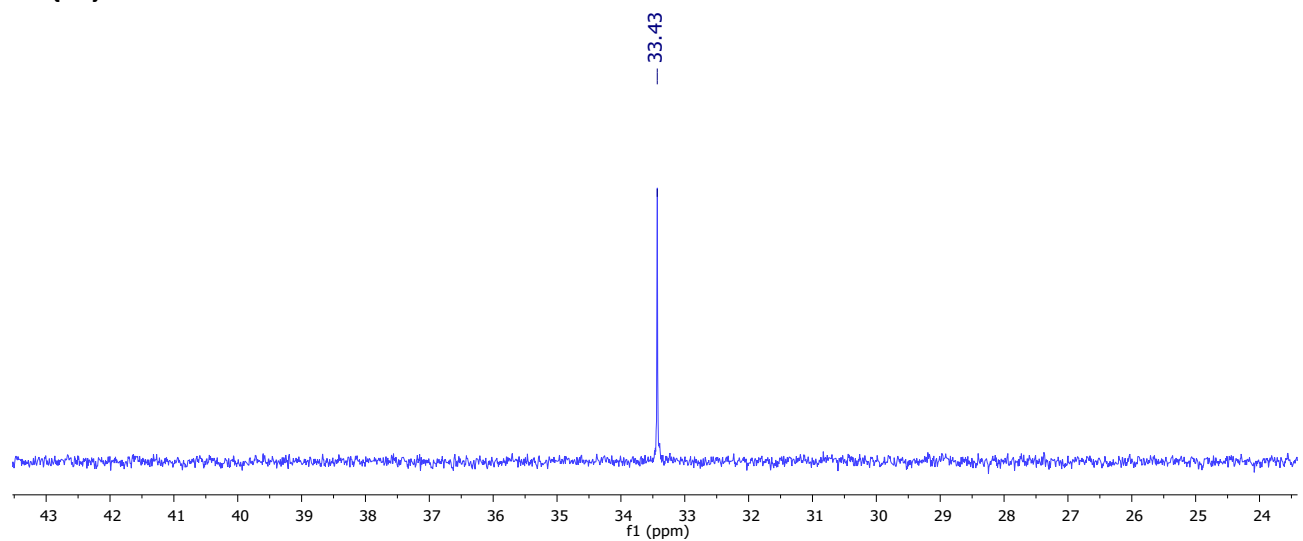

$^{13}\text{C}\{^1\text{H}\}$  NMR

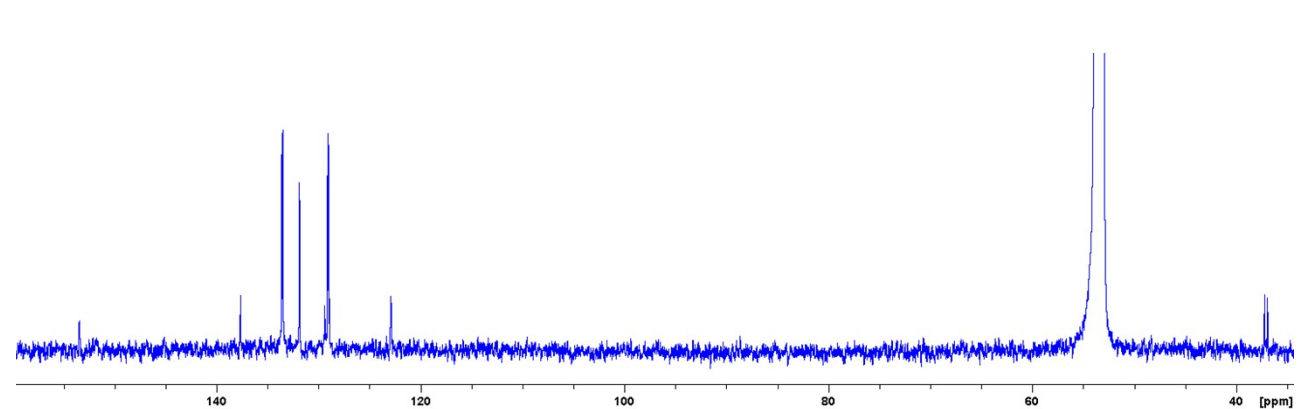

Figure S16. NMR spectra of  $\text{DPPMPY}(\text{AuCl})_2$ , **1**

$^1\text{H}$  NMR

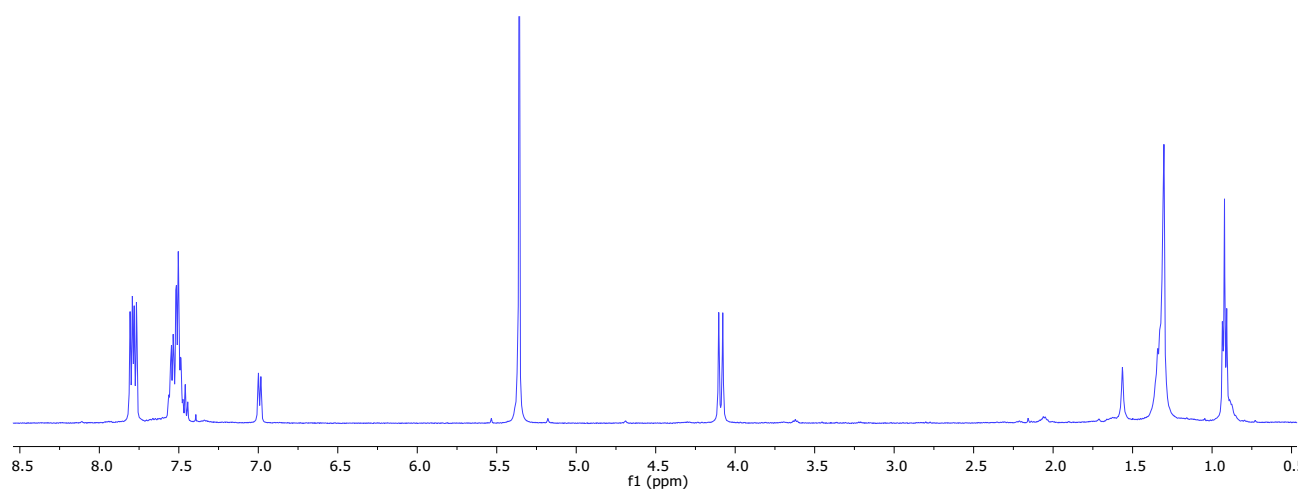

$^{31}\text{P}\{^1\text{H}\}$  NMR

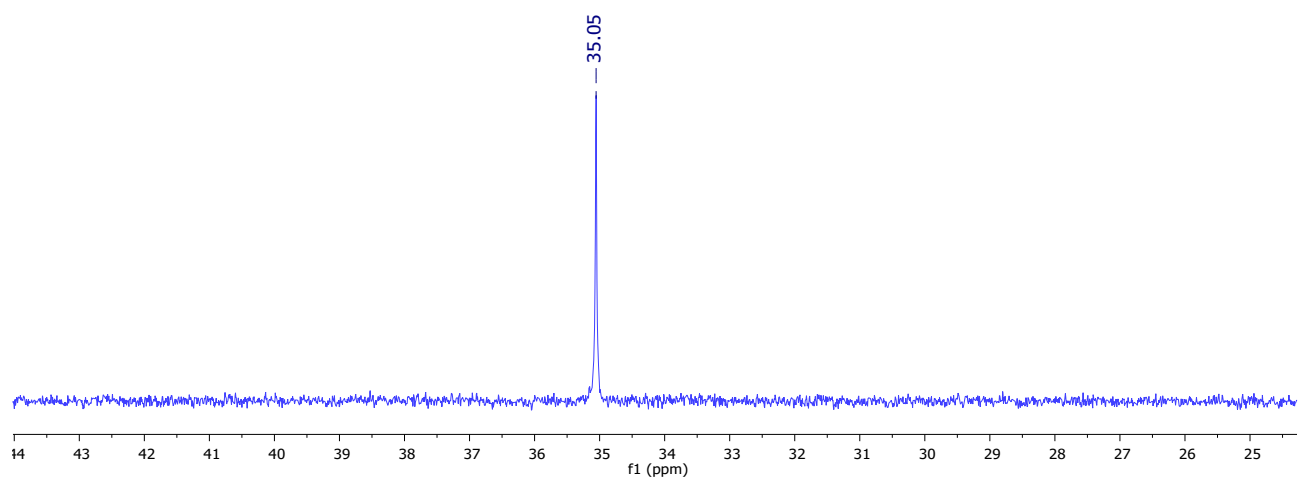

$^{13}\text{C}\{^1\text{H}\}$  NMR

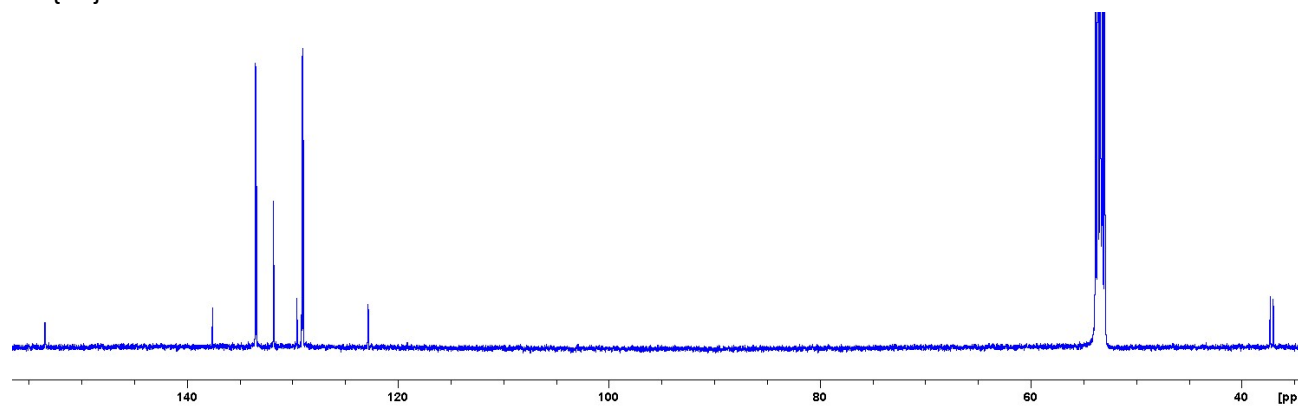

Figure S17. NMR spectra of  $\text{DPPMPY}(\text{AuBr})_2$ , **2**

$^1\text{H}$  NMR

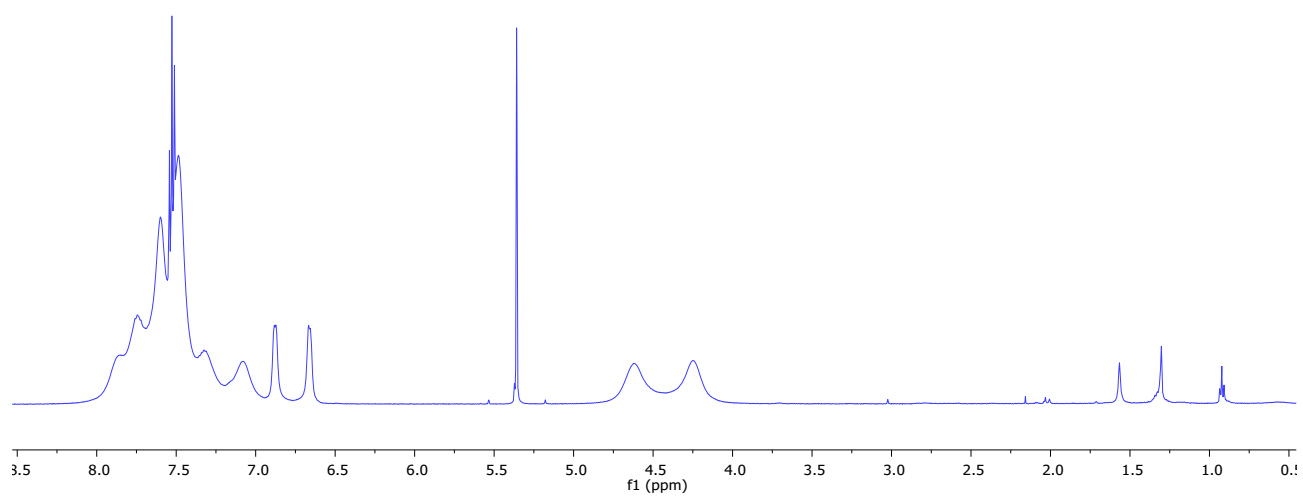

$^{31}\text{P}\{^1\text{H}\}$  NMR

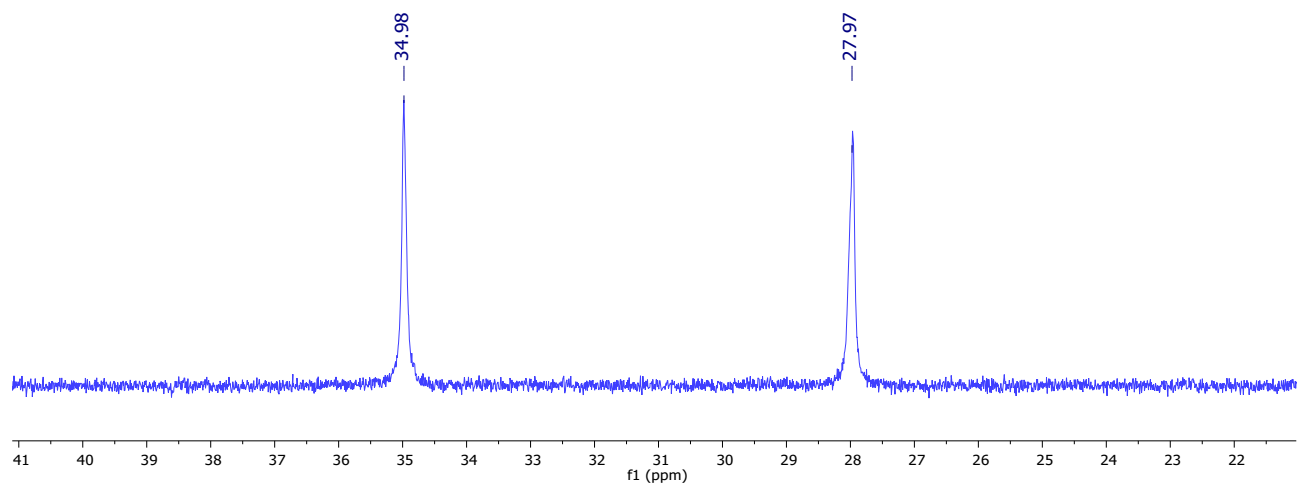

$^{13}\text{C}\{^1\text{H}\}$  NMR

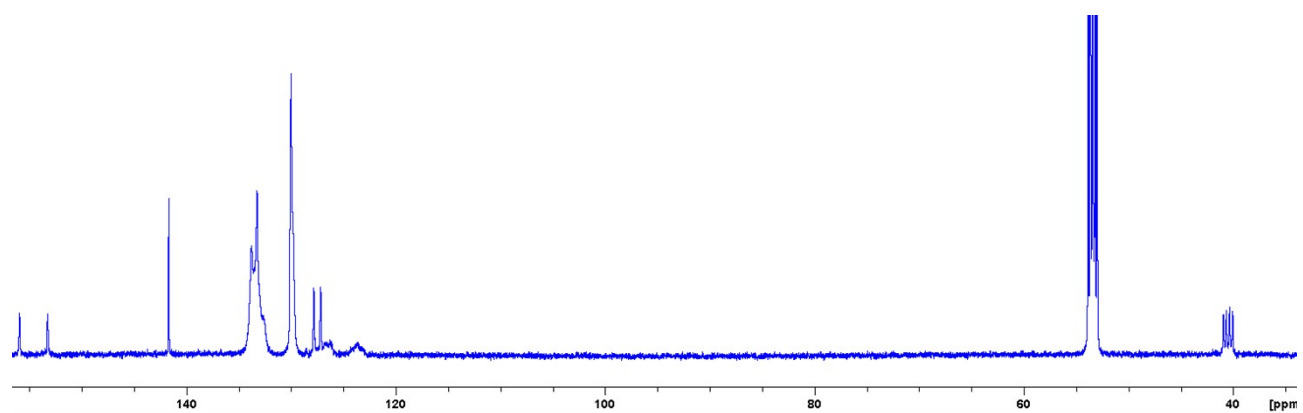

Figure S18. NMR spectra of  $(\text{DPPMPY}_2\text{Au}_4\text{Cl}_2)(\text{SbF}_6)_2$ , **3**

$^1\text{H}$  NMR

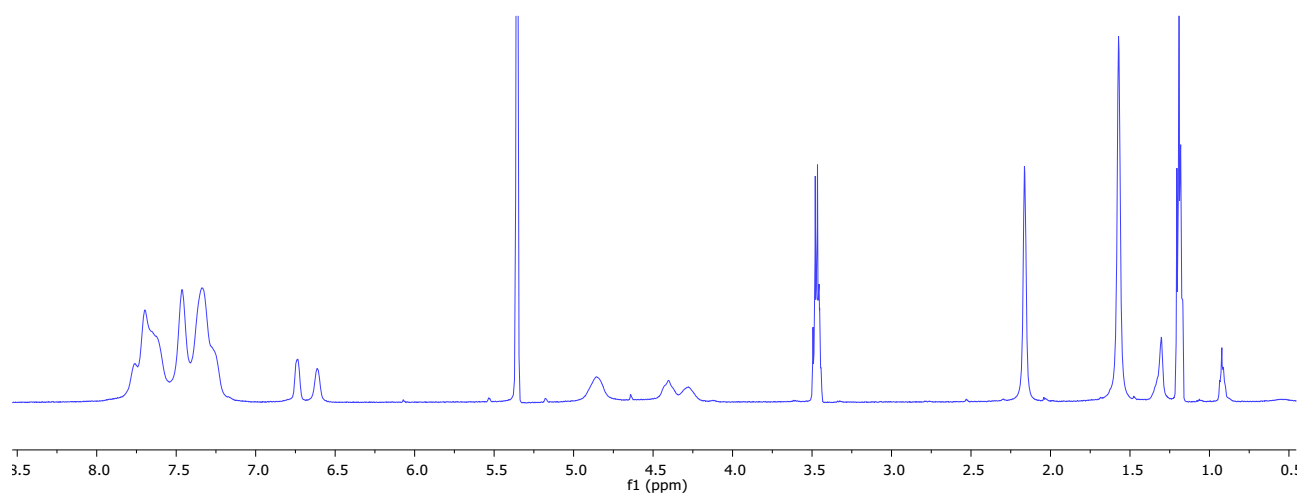

$^{31}\text{P}\{^1\text{H}\}$  NMR

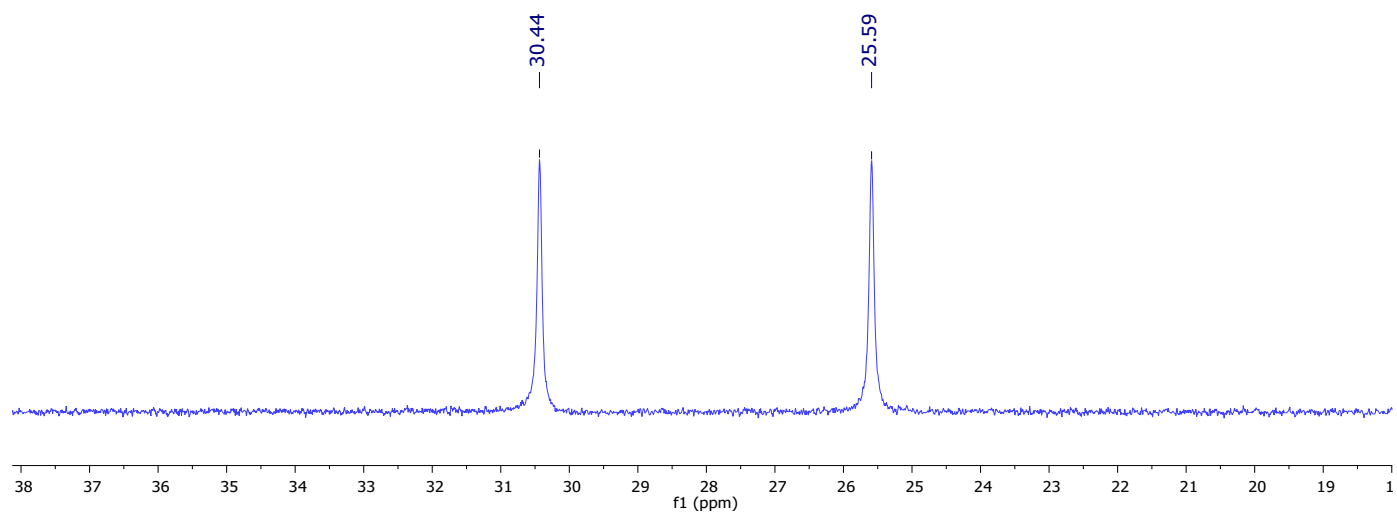

$^{13}\text{C}\{^1\text{H}\}$  NMR

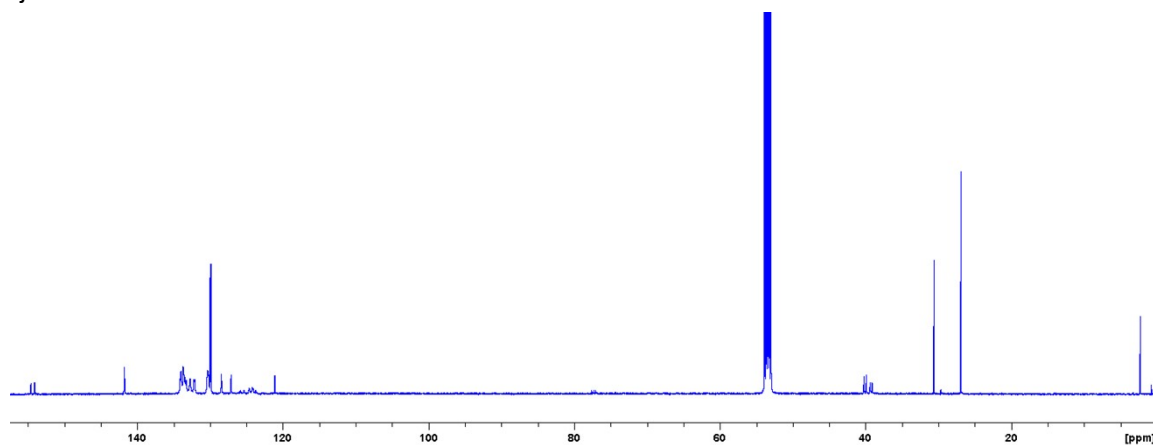

**Figure S19.** NMR spectra of  $(\text{DPPMPY}_2\text{Au}_4(\text{MeCN})_2)(\text{SbF}_6)_4$ , **4**

$^1\text{H}$  NMR

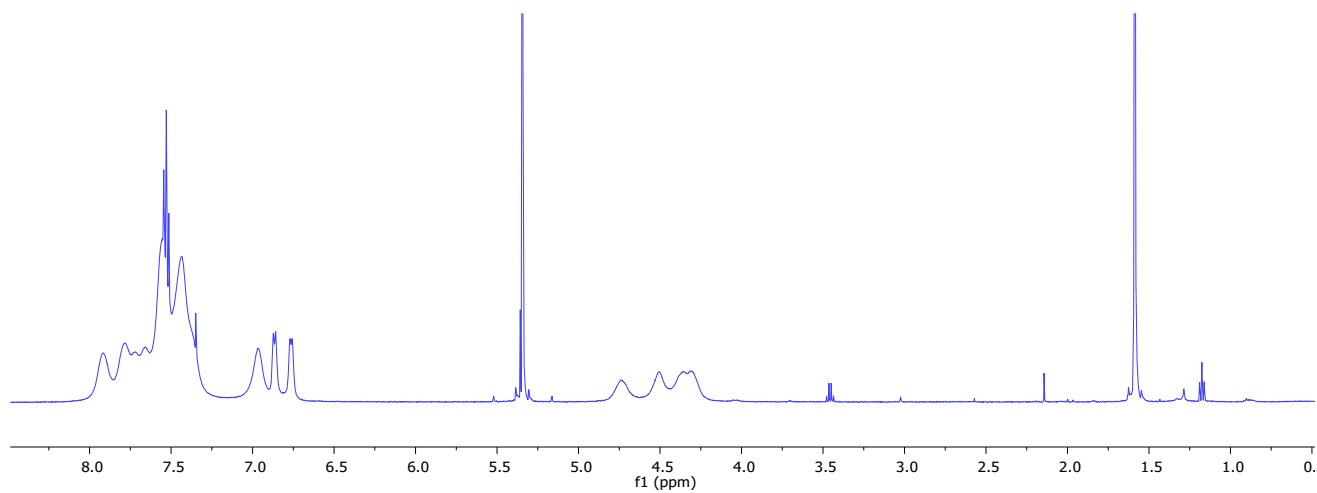

$^{31}\text{P}\{^1\text{H}\}$  NMR

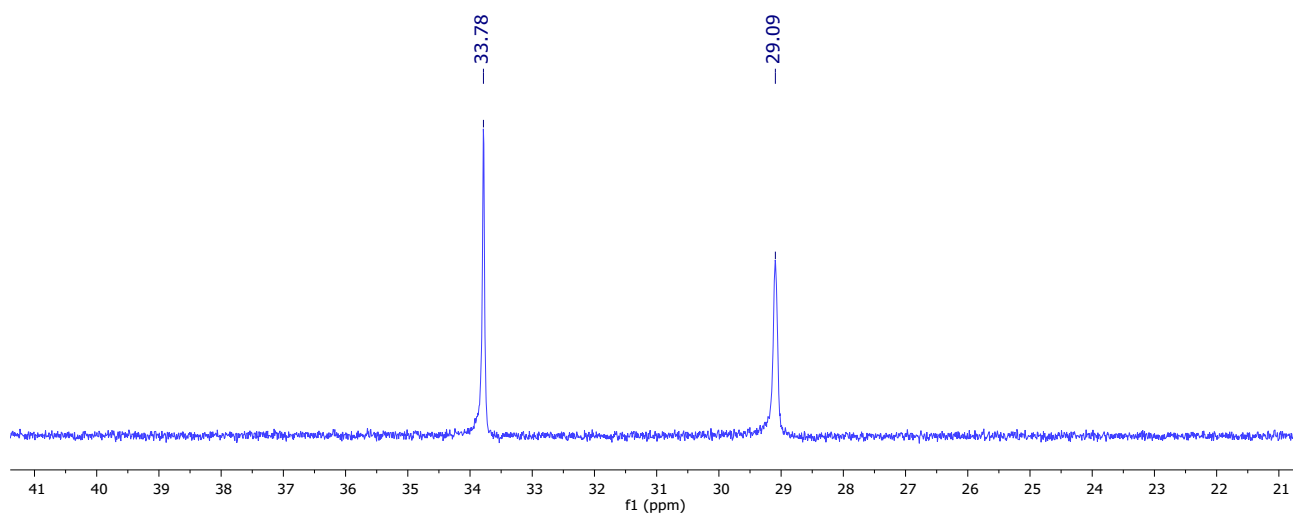

$^{13}\text{C}\{^1\text{H}\}$  NMR

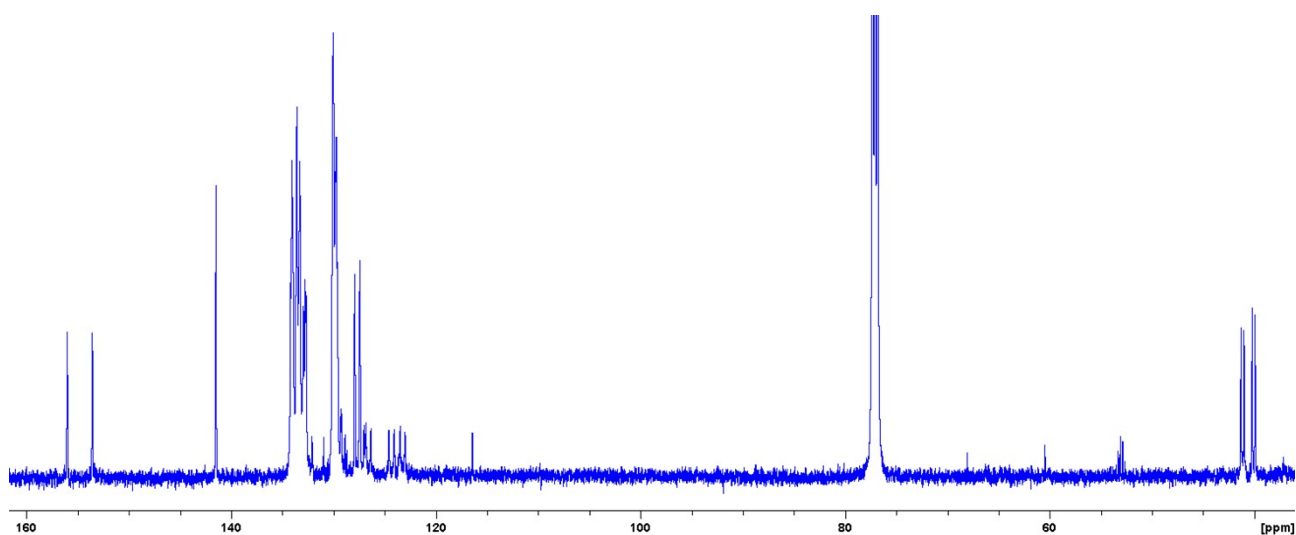

Figure S20. NMR spectra of  $(\text{DPPMPY}_2\text{Au}_4\text{Cl}_2)(\text{BF}_4)_2$ , **5**

$^1\text{H}$  NMR

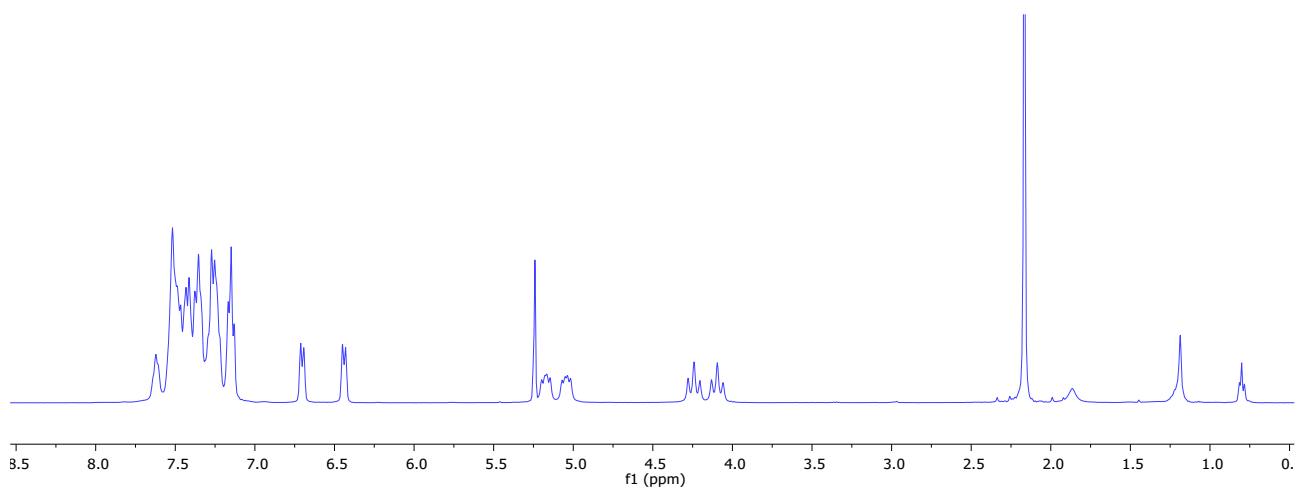

$^{31}\text{P}\{^1\text{H}\}$  NMR

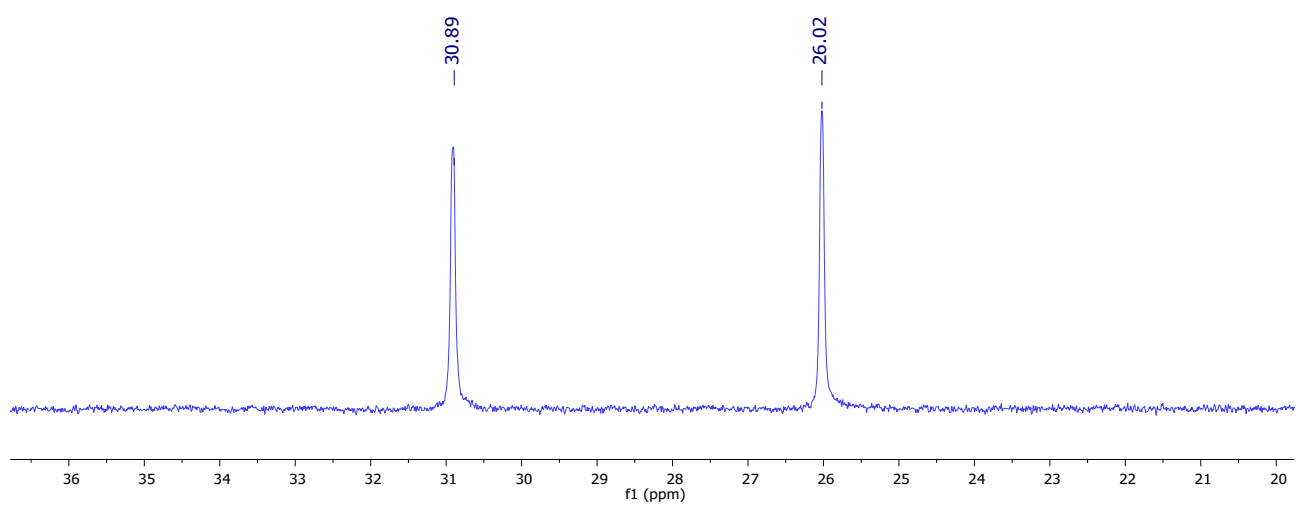

$^{13}\text{C}\{^1\text{H}\}$  NMR

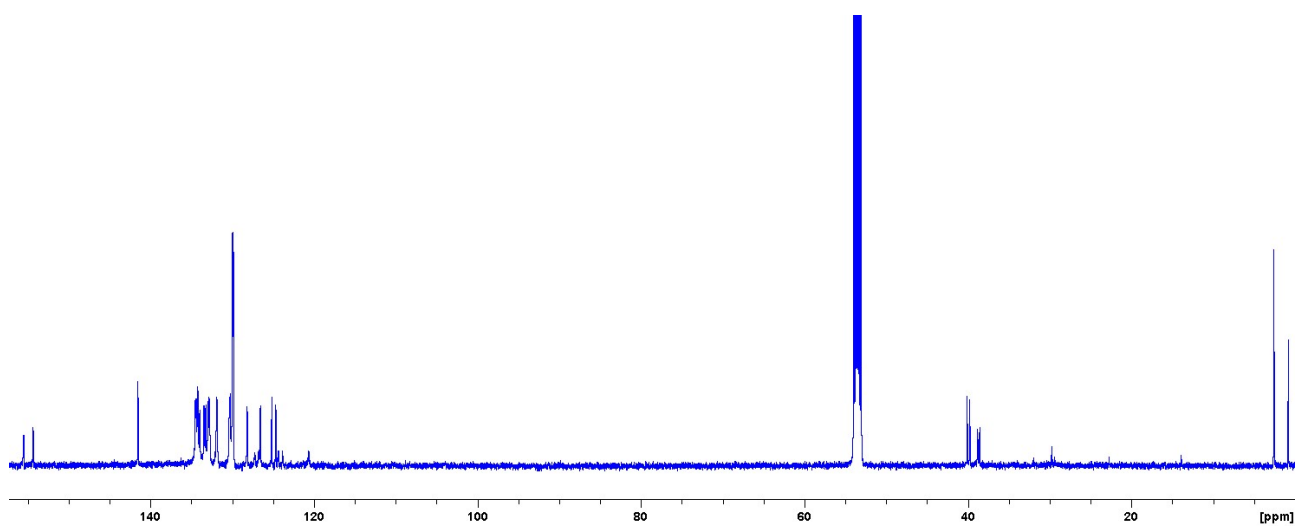

**Figure S21.** NMR spectra of  $(\text{DPPMPY}_2\text{Au}_4(\text{MeCN})_2)(\text{BF}_4)_4$ , **6**

$^1\text{H}$  NMR

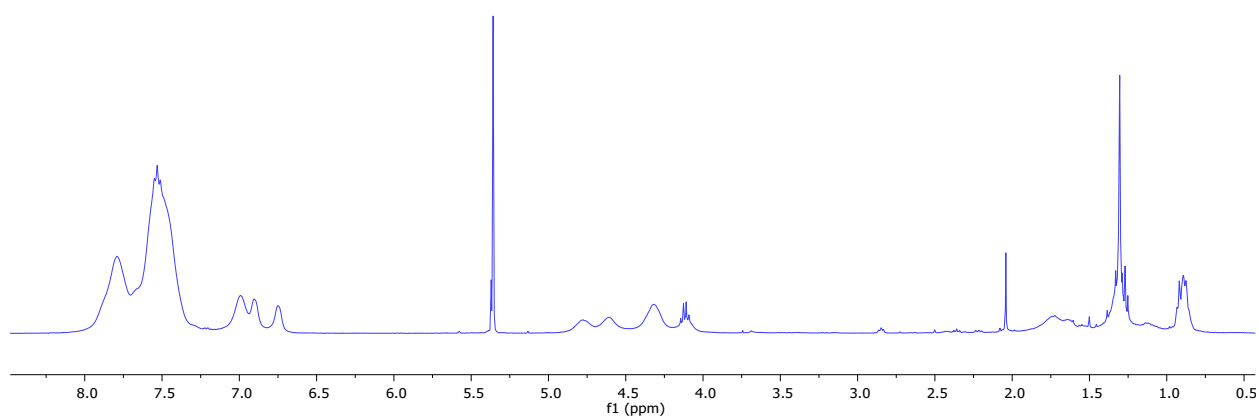

$^{31}\text{P}\{^1\text{H}\}$  NMR

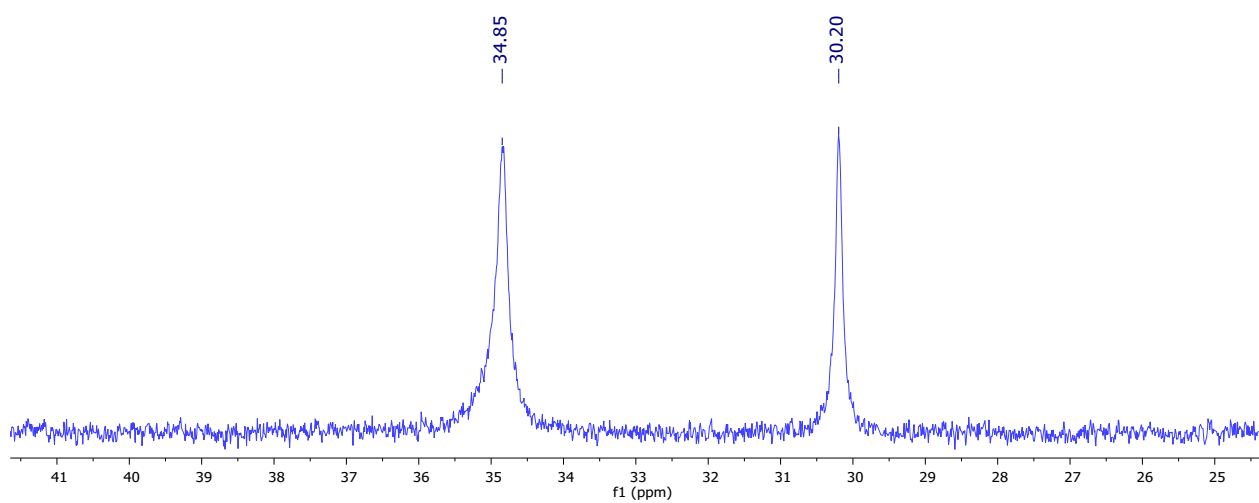

$^{13}\text{C}\{^1\text{H}\}$  NMR



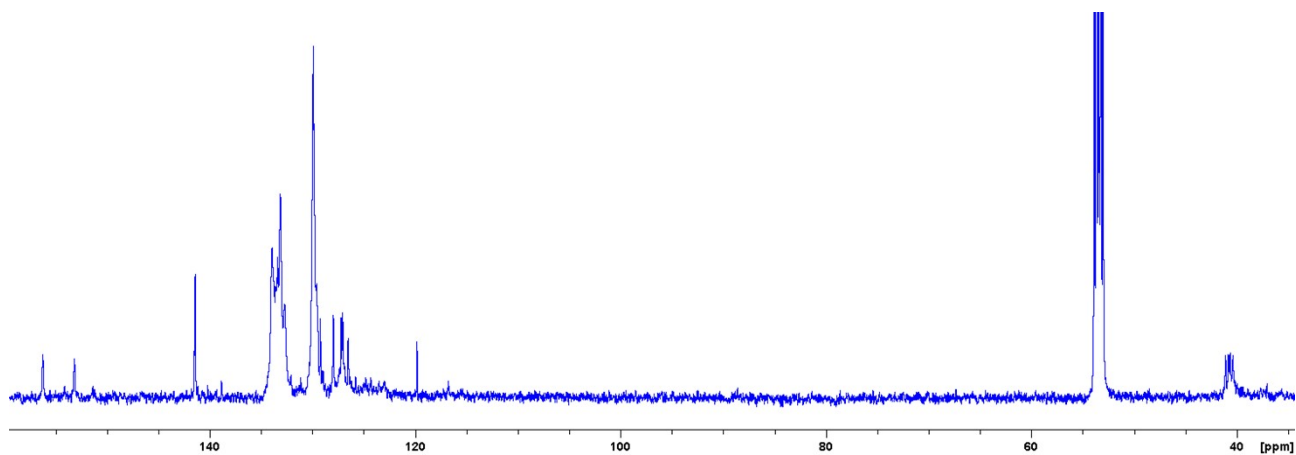

Figure S22. NMR spectra of  $(\text{DPPMPY}_2\text{Au}_4\text{Br}_2)(\text{BF}_4)_2$ , **7**

### VIII. X-RAY data

#### Complex 1

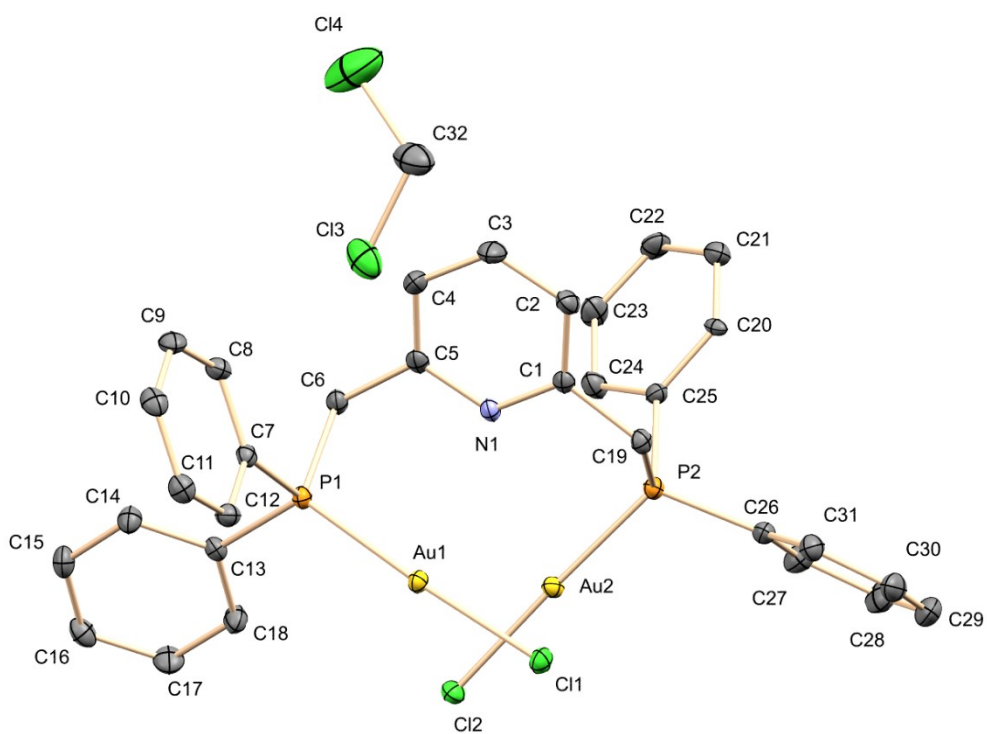

**Table 1.** Crystal data and structure refinement for **Complex 1**.

|                                   |                                                                                     |                  |
|-----------------------------------|-------------------------------------------------------------------------------------|------------------|
| Identification code               | <b>Complex 1</b>                                                                    |                  |
| Empirical formula                 | C <sub>31.50</sub> H <sub>28</sub> Au <sub>2</sub> Cl <sub>3</sub> N P <sub>2</sub> |                  |
| Formula weight                    | 982.77                                                                              |                  |
| Temperature                       | 100.0 K                                                                             |                  |
| Wavelength                        | 0.71073 Å                                                                           |                  |
| Crystal system                    | Triclinic                                                                           |                  |
| Space group                       | P-1                                                                                 |                  |
| Unit cell dimensions              | a = 8.9762(4) Å                                                                     | α = 90.049(2)°.  |
|                                   | b = 12.4423(5) Å                                                                    | β = 95.592(2)°.  |
|                                   | c = 14.4881(7) Å                                                                    | γ = 107.456(2)°. |
| Volume                            | 1535.46(12) Å <sup>3</sup>                                                          |                  |
| Z                                 | 2                                                                                   |                  |
| Density (calculated)              | 2.126 Mg/m <sup>3</sup>                                                             |                  |
| Absorption coefficient            | 9.932 mm <sup>-1</sup>                                                              |                  |
| F(000)                            | 926                                                                                 |                  |
| Crystal size                      | 0.13 x 0.105 x 0.085 mm <sup>3</sup>                                                |                  |
| Theta range for data collection   | 2.258 to 30.034°.                                                                   |                  |
| Index ranges                      | -12 ≤ h ≤ 12, -17 ≤ k ≤ 17, -20 ≤ l ≤ 20                                            |                  |
| Reflections collected             | 148921                                                                              |                  |
| Independent reflections           | 8988 [R(int) = 0.0721]                                                              |                  |
| Completeness to theta = 25.242°   | 99.9 %                                                                              |                  |
| Absorption correction             | Semi-empirical from equivalents                                                     |                  |
| Max. and min. transmission        | 0.7465 and 0.5249                                                                   |                  |
| Refinement method                 | Full-matrix least-squares on F <sup>2</sup>                                         |                  |
| Data / restraints / parameters    | 8988 / 24 / 370                                                                     |                  |
| Goodness-of-fit on F <sup>2</sup> | 1.094                                                                               |                  |
| Final R indices [I > 2σ(I)]       | R1 = 0.0177, wR2 = 0.0355                                                           |                  |
| R indices (all data)              | R1 = 0.0239, wR2 = 0.0369                                                           |                  |
| Extinction coefficient            | n/a                                                                                 |                  |
| Largest diff. peak and hole       | 0.717 and -0.953 e.Å <sup>-3</sup>                                                  |                  |

**Table 2.** Atomic coordinates ( $\times 10^4$ ) and equivalent isotropic displacement parameters ( $\text{\AA}^2 \times 10^3$ ) for **Complex 1**.  $U(\text{eq})$  is defined as one third of the trace of the orthogonalized  $U^{ij}$  tensor.

|       | x       | y        | z       | $U(\text{eq})$ |
|-------|---------|----------|---------|----------------|
| Au(1) | 6395(1) | 7911(1)  | 1696(1) | 11(1)          |
| Au(2) | 7439(1) | 5900(1)  | 2897(1) | 11(1)          |
| Cl(1) | 7848(1) | 7165(1)  | 794(1)  | 15(1)          |
| Cl(2) | 9245(1) | 7474(1)  | 3621(1) | 15(1)          |
| P(1)  | 4831(1) | 8582(1)  | 2488(1) | 11(1)          |
| P(2)  | 5765(1) | 4326(1)  | 2226(1) | 11(1)          |
| N(1)  | 3789(2) | 5906(2)  | 2132(1) | 12(1)          |
| C(1)  | 3281(3) | 5056(2)  | 1497(2) | 12(1)          |
| C(2)  | 1731(3) | 4691(2)  | 1097(2) | 17(1)          |
| C(3)  | 693(3)  | 5242(2)  | 1352(2) | 22(1)          |
| C(4)  | 1223(3) | 6133(2)  | 1999(2) | 18(1)          |
| C(5)  | 2777(3) | 6434(2)  | 2377(2) | 13(1)          |
| C(6)  | 3490(3) | 7420(2)  | 3054(2) | 14(1)          |
| C(7)  | 3613(3) | 9256(2)  | 1777(2) | 12(1)          |
| C(8)  | 2023(3) | 9076(2)  | 1869(2) | 15(1)          |
| C(9)  | 1183(3) | 9664(2)  | 1328(2) | 17(1)          |
| C(10) | 1914(3) | 10435(2) | 701(2)  | 18(1)          |
| C(11) | 3505(3) | 10622(2) | 613(2)  | 17(1)          |
| C(12) | 4347(3) | 10035(2) | 1144(2) | 15(1)          |
| C(13) | 5808(3) | 9626(2)  | 3398(2) | 12(1)          |
| C(14) | 5111(3) | 10416(2) | 3676(2) | 16(1)          |
| C(15) | 5898(3) | 11237(2) | 4347(2) | 18(1)          |
| C(16) | 7373(3) | 11272(2) | 4748(2) | 18(1)          |
| C(17) | 8049(3) | 10470(2) | 4493(2) | 21(1)          |
| C(18) | 7286(3) | 9650(2)  | 3809(2) | 18(1)          |
| C(19) | 4492(3) | 4545(2)  | 1224(2) | 12(1)          |
| C(20) | 3323(2) | 2489(2)  | 2706(2) | 10(1)          |
| C(21) | 2260(3) | 1869(2)  | 3265(2) | 18(1)          |
| C(22) | 2264(3) | 2280(2)  | 4152(2) | 21(1)          |
| C(23) | 3338(3) | 3294(2)  | 4467(2) | 22(1)          |
| C(24) | 4411(3) | 3906(2)  | 3889(2) | 18(1)          |
| C(25) | 4414(3) | 3498(2)  | 2992(2) | 12(1)          |
| C(26) | 6752(3) | 3390(2)  | 1778(2) | 14(1)          |
| C(27) | 7574(3) | 2878(2)  | 2418(2) | 22(1)          |

|       |          |         |         |       |
|-------|----------|---------|---------|-------|
| C(28) | 8419(3)  | 2202(3) | 2116(2) | 28(1) |
| C(29) | 8467(3)  | 2039(2) | 1175(2) | 27(1) |
| C(30) | 7660(3)  | 2536(2) | 534(2)  | 24(1) |
| C(31) | 6799(3)  | 3205(2) | 832(2)  | 17(1) |
| Cl(3) | 1806(5)  | 5650(3) | 4921(3) | 33(1) |
| Cl(4) | -1435(5) | 4578(4) | 5266(4) | 70(1) |
| C(32) | 68(6)    | 4593(5) | 4562(5) | 36(1) |

---

**Table 3.** Bond lengths [Å] and angles [°] for **Complex 1**.

|             |           |
|-------------|-----------|
| Au(1)-Cl(1) | 2.3078(6) |
| Au(1)-P(1)  | 2.2365(6) |
| Au(2)-Cl(2) | 2.3078(6) |
| Au(2)-P(2)  | 2.2320(6) |
| P(1)-C(6)   | 1.833(2)  |
| P(1)-C(7)   | 1.815(2)  |
| P(1)-C(13)  | 1.811(2)  |
| P(2)-C(19)  | 1.830(2)  |
| P(2)-C(25)  | 1.810(2)  |
| P(2)-C(26)  | 1.815(2)  |
| N(1)-C(1)   | 1.341(3)  |
| N(1)-C(5)   | 1.343(3)  |
| C(1)-C(2)   | 1.393(3)  |
| C(1)-C(19)  | 1.498(3)  |
| C(2)-H(2)   | 0.9500    |
| C(2)-C(3)   | 1.388(4)  |
| C(3)-H(3)   | 0.9500    |
| C(3)-C(4)   | 1.389(4)  |
| C(4)-H(4)   | 0.9500    |
| C(4)-C(5)   | 1.387(3)  |
| C(5)-C(6)   | 1.511(3)  |
| C(6)-H(6A)  | 0.9900    |
| C(6)-H(6B)  | 0.9900    |
| C(7)-C(8)   | 1.397(3)  |
| C(7)-C(12)  | 1.397(3)  |
| C(8)-H(8)   | 0.9500    |
| C(8)-C(9)   | 1.392(3)  |

|              |          |
|--------------|----------|
| C(9)-H(9)    | 0.9500   |
| C(9)-C(10)   | 1.384(4) |
| C(10)-H(10)  | 0.9500   |
| C(10)-C(11)  | 1.394(4) |
| C(11)-H(11)  | 0.9500   |
| C(11)-C(12)  | 1.385(3) |
| C(12)-H(12)  | 0.9500   |
| C(13)-C(14)  | 1.392(3) |
| C(13)-C(18)  | 1.392(3) |
| C(14)-H(14)  | 0.9500   |
| C(14)-C(15)  | 1.385(3) |
| C(15)-H(15)  | 0.9500   |
| C(15)-C(16)  | 1.381(4) |
| C(16)-H(16)  | 0.9500   |
| C(16)-C(17)  | 1.381(4) |
| C(17)-H(17)  | 0.9500   |
| C(17)-C(18)  | 1.392(4) |
| C(18)-H(18)  | 0.9500   |
| C(19)-H(19A) | 0.9900   |
| C(19)-H(19B) | 0.9900   |
| C(20)-H(20)  | 0.9500   |
| C(20)-C(21)  | 1.369(3) |
| C(20)-C(25)  | 1.375(3) |
| C(21)-H(21)  | 0.9500   |
| C(21)-C(22)  | 1.382(4) |
| C(22)-H(22)  | 0.9500   |
| C(22)-C(23)  | 1.383(4) |
| C(23)-H(23)  | 0.9500   |
| C(23)-C(24)  | 1.389(3) |
| C(24)-H(24)  | 0.9500   |
| C(24)-C(25)  | 1.395(3) |
| C(26)-C(27)  | 1.399(4) |
| C(26)-C(31)  | 1.396(3) |
| C(27)-H(27)  | 0.9500   |
| C(27)-C(28)  | 1.386(4) |
| C(28)-H(28)  | 0.9500   |
| C(28)-C(29)  | 1.386(4) |
| C(29)-H(29)  | 0.9500   |
| C(29)-C(30)  | 1.381(4) |

|              |          |
|--------------|----------|
| C(30)-H(30)  | 0.9500   |
| C(30)-C(31)  | 1.389(4) |
| C(31)-H(31)  | 0.9500   |
| Cl(3)-C(32)  | 1.745(6) |
| Cl(4)-C(32)  | 1.765(7) |
| C(32)-H(32A) | 0.9900   |
| C(32)-H(32B) | 0.9900   |

|                  |            |
|------------------|------------|
| P(1)-Au(1)-Cl(1) | 175.59(2)  |
| P(2)-Au(2)-Cl(2) | 177.17(2)  |
| C(6)-P(1)-Au(1)  | 109.46(8)  |
| C(7)-P(1)-Au(1)  | 114.16(8)  |
| C(7)-P(1)-C(6)   | 106.56(11) |
| C(13)-P(1)-Au(1) | 115.94(8)  |
| C(13)-P(1)-C(6)  | 106.05(11) |
| C(13)-P(1)-C(7)  | 103.95(11) |
| C(19)-P(2)-Au(2) | 114.95(8)  |
| C(25)-P(2)-Au(2) | 113.83(8)  |
| C(25)-P(2)-C(19) | 104.12(11) |
| C(25)-P(2)-C(26) | 106.21(11) |
| C(26)-P(2)-Au(2) | 112.70(8)  |
| C(26)-P(2)-C(19) | 104.04(11) |
| C(1)-N(1)-C(5)   | 118.8(2)   |
| N(1)-C(1)-C(2)   | 122.2(2)   |
| N(1)-C(1)-C(19)  | 115.9(2)   |
| C(2)-C(1)-C(19)  | 121.9(2)   |
| C(1)-C(2)-H(2)   | 120.7      |
| C(3)-C(2)-C(1)   | 118.6(2)   |
| C(3)-C(2)-H(2)   | 120.7      |
| C(2)-C(3)-H(3)   | 120.3      |
| C(2)-C(3)-C(4)   | 119.3(2)   |
| C(4)-C(3)-H(3)   | 120.3      |
| C(3)-C(4)-H(4)   | 120.7      |
| C(5)-C(4)-C(3)   | 118.6(2)   |
| C(5)-C(4)-H(4)   | 120.7      |
| N(1)-C(5)-C(4)   | 122.5(2)   |
| N(1)-C(5)-C(6)   | 114.6(2)   |
| C(4)-C(5)-C(6)   | 122.8(2)   |
| P(1)-C(6)-H(6A)  | 109.6      |

|                   |            |
|-------------------|------------|
| P(1)-C(6)-H(6B)   | 109.6      |
| C(5)-C(6)-P(1)    | 110.15(16) |
| C(5)-C(6)-H(6A)   | 109.6      |
| C(5)-C(6)-H(6B)   | 109.6      |
| H(6A)-C(6)-H(6B)  | 108.1      |
| C(8)-C(7)-P(1)    | 123.25(18) |
| C(12)-C(7)-P(1)   | 117.25(18) |
| C(12)-C(7)-C(8)   | 119.4(2)   |
| C(7)-C(8)-H(8)    | 120.0      |
| C(9)-C(8)-C(7)    | 119.9(2)   |
| C(9)-C(8)-H(8)    | 120.0      |
| C(8)-C(9)-H(9)    | 119.8      |
| C(10)-C(9)-C(8)   | 120.5(2)   |
| C(10)-C(9)-H(9)   | 119.8      |
| C(9)-C(10)-H(10)  | 120.2      |
| C(9)-C(10)-C(11)  | 119.6(2)   |
| C(11)-C(10)-H(10) | 120.2      |
| C(10)-C(11)-H(11) | 119.9      |
| C(12)-C(11)-C(10) | 120.3(2)   |
| C(12)-C(11)-H(11) | 119.9      |
| C(7)-C(12)-H(12)  | 119.9      |
| C(11)-C(12)-C(7)  | 120.2(2)   |
| C(11)-C(12)-H(12) | 119.9      |
| C(14)-C(13)-P(1)  | 120.74(18) |
| C(18)-C(13)-P(1)  | 119.49(18) |
| C(18)-C(13)-C(14) | 119.8(2)   |
| C(13)-C(14)-H(14) | 119.9      |
| C(15)-C(14)-C(13) | 120.1(2)   |
| C(15)-C(14)-H(14) | 119.9      |
| C(14)-C(15)-H(15) | 119.9      |
| C(16)-C(15)-C(14) | 120.2(2)   |
| C(16)-C(15)-H(15) | 119.9      |
| C(15)-C(16)-H(16) | 120.1      |
| C(17)-C(16)-C(15) | 119.8(2)   |
| C(17)-C(16)-H(16) | 120.1      |
| C(16)-C(17)-H(17) | 119.7      |
| C(16)-C(17)-C(18) | 120.7(2)   |
| C(18)-C(17)-H(17) | 119.7      |
| C(13)-C(18)-C(17) | 119.3(2)   |

|                     |            |
|---------------------|------------|
| C(13)-C(18)-H(18)   | 120.3      |
| C(17)-C(18)-H(18)   | 120.3      |
| P(2)-C(19)-H(19A)   | 109.1      |
| P(2)-C(19)-H(19B)   | 109.1      |
| C(1)-C(19)-P(2)     | 112.28(16) |
| C(1)-C(19)-H(19A)   | 109.1      |
| C(1)-C(19)-H(19B)   | 109.1      |
| H(19A)-C(19)-H(19B) | 107.9      |
| C(21)-C(20)-H(20)   | 118.6      |
| C(21)-C(20)-C(25)   | 122.9(2)   |
| C(25)-C(20)-H(20)   | 118.6      |
| C(20)-C(21)-H(21)   | 120.6      |
| C(20)-C(21)-C(22)   | 118.7(2)   |
| C(22)-C(21)-H(21)   | 120.6      |
| C(21)-C(22)-H(22)   | 119.8      |
| C(21)-C(22)-C(23)   | 120.3(2)   |
| C(23)-C(22)-H(22)   | 119.8      |
| C(22)-C(23)-H(23)   | 120.0      |
| C(22)-C(23)-C(24)   | 119.9(2)   |
| C(24)-C(23)-H(23)   | 120.0      |
| C(23)-C(24)-H(24)   | 119.9      |
| C(23)-C(24)-C(25)   | 120.1(2)   |
| C(25)-C(24)-H(24)   | 119.9      |
| C(20)-C(25)-P(2)    | 122.04(18) |
| C(20)-C(25)-C(24)   | 118.0(2)   |
| C(24)-C(25)-P(2)    | 119.91(18) |
| C(27)-C(26)-P(2)    | 117.86(19) |
| C(31)-C(26)-P(2)    | 123.26(19) |
| C(31)-C(26)-C(27)   | 118.8(2)   |
| C(26)-C(27)-H(27)   | 119.7      |
| C(28)-C(27)-C(26)   | 120.5(3)   |
| C(28)-C(27)-H(27)   | 119.7      |
| C(27)-C(28)-H(28)   | 120.1      |
| C(29)-C(28)-C(27)   | 119.9(3)   |
| C(29)-C(28)-H(28)   | 120.1      |
| C(28)-C(29)-H(29)   | 119.8      |
| C(30)-C(29)-C(28)   | 120.3(3)   |
| C(30)-C(29)-H(29)   | 119.8      |
| C(29)-C(30)-H(30)   | 120.0      |



|                     |          |
|---------------------|----------|
| C(29)-C(30)-C(31)   | 120.0(3) |
| C(31)-C(30)-H(30)   | 120.0    |
| C(26)-C(31)-H(31)   | 119.8    |
| C(30)-C(31)-C(26)   | 120.4(2) |
| C(30)-C(31)-H(31)   | 119.8    |
| Cl(3)-C(32)-Cl(4)   | 111.8(4) |
| Cl(3)-C(32)-H(32A)  | 109.3    |
| Cl(3)-C(32)-H(32B)  | 109.3    |
| Cl(4)-C(32)-H(32A)  | 109.3    |
| Cl(4)-C(32)-H(32B)  | 109.3    |
| H(32A)-C(32)-H(32B) | 107.9    |

---

Symmetry transformations used to generate equivalent atoms:

**Table 4.** Anisotropic displacement parameters ( $\text{\AA}^2 \times 10^3$ ) for **Complex 1**. The anisotropic displacement factor exponent takes the form:  $-2\pi^2 [ h^2 a^{*2} U^{11} + \dots + 2 h k a^* b^* U^{12} ]$

---

|       | U <sup>11</sup> | U <sup>22</sup> | U <sup>33</sup> | U <sup>23</sup> | U <sup>13</sup> | U <sup>12</sup> |
|-------|-----------------|-----------------|-----------------|-----------------|-----------------|-----------------|
| Au(1) | 13(1)           | 11(1)           | 11(1)           | -1(1)           | 2(1)            | 4(1)            |
| Au(2) | 11(1)           | 12(1)           | 10(1)           | -1(1)           | 1(1)            | 2(1)            |
| Cl(1) | 18(1)           | 16(1)           | 13(1)           | -1(1)           | 5(1)            | 6(1)            |
| Cl(2) | 12(1)           | 15(1)           | 17(1)           | -4(1)           | 1(1)            | 2(1)            |
| P(1)  | 12(1)           | 10(1)           | 10(1)           | -1(1)           | 1(1)            | 4(1)            |
| P(2)  | 12(1)           | 12(1)           | 9(1)            | -1(1)           | 1(1)            | 3(1)            |
| N(1)  | 14(1)           | 9(1)            | 11(1)           | -1(1)           | 2(1)            | 3(1)            |
| C(1)  | 14(1)           | 10(1)           | 11(1)           | 2(1)            | 4(1)            | 3(1)            |
| C(2)  | 15(1)           | 16(1)           | 18(1)           | -6(1)           | 2(1)            | 0(1)            |
| C(3)  | 11(1)           | 24(1)           | 29(2)           | -8(1)           | 1(1)            | 1(1)            |
| C(4)  | 14(1)           | 16(1)           | 25(1)           | -4(1)           | 6(1)            | 3(1)            |
| C(5)  | 16(1)           | 10(1)           | 11(1)           | 2(1)            | 6(1)            | 2(1)            |
| C(6)  | 16(1)           | 11(1)           | 14(1)           | 0(1)            | 3(1)            | 4(1)            |
| C(7)  | 13(1)           | 12(1)           | 11(1)           | -3(1)           | -1(1)           | 3(1)            |
| C(8)  | 13(1)           | 15(1)           | 16(1)           | 0(1)            | 2(1)            | 1(1)            |
| C(9)  | 11(1)           | 18(1)           | 21(1)           | -1(1)           | -1(1)           | 2(1)            |
| C(10) | 19(1)           | 17(1)           | 16(1)           | -1(1)           | -5(1)           | 5(1)            |
| C(11) | 21(1)           | 16(1)           | 13(1)           | 1(1)            | 1(1)            | 4(1)            |
| C(12) | 13(1)           | 17(1)           | 14(1)           | -2(1)           | 2(1)            | 2(1)            |
| C(13) | 14(1)           | 10(1)           | 11(1)           | 0(1)            | 1(1)            | 2(1)            |

---

|       |       |       |        |       |       |       |
|-------|-------|-------|--------|-------|-------|-------|
| C(14) | 16(1) | 17(1) | 16(1)  | -3(1) | -2(1) | 8(1)  |
| C(15) | 24(1) | 15(1) | 17(1)  | -3(1) | 2(1)  | 9(1)  |
| C(16) | 22(1) | 16(1) | 14(1)  | -2(1) | -2(1) | 2(1)  |
| C(17) | 16(1) | 24(1) | 23(1)  | -3(1) | -6(1) | 6(1)  |
| C(18) | 17(1) | 17(1) | 22(1)  | -4(1) | -2(1) | 9(1)  |
| C(19) | 15(1) | 13(1) | 9(1)   | -2(1) | 1(1)  | 4(1)  |
| C(20) | 6(1)  | 9(1)  | 12(1)  | 3(1)  | -1(1) | 1(1)  |
| C(21) | 15(1) | 15(1) | 25(1)  | 1(1)  | 4(1)  | 2(1)  |
| C(22) | 21(1) | 20(1) | 24(1)  | 6(1)  | 13(1) | 7(1)  |
| C(23) | 28(1) | 22(1) | 17(1)  | -1(1) | 11(1) | 5(1)  |
| C(24) | 21(1) | 15(1) | 16(1)  | -2(1) | 4(1)  | 2(1)  |
| C(25) | 11(1) | 12(1) | 14(1)  | 1(1)  | 4(1)  | 4(1)  |
| C(26) | 13(1) | 11(1) | 17(1)  | 0(1)  | 4(1)  | 2(1)  |
| C(27) | 22(1) | 29(1) | 22(1)  | 5(1)  | 5(1)  | 13(1) |
| C(28) | 25(1) | 29(2) | 36(2)  | 9(1)  | 6(1)  | 17(1) |
| C(29) | 20(1) | 21(1) | 43(2)  | -3(1) | 9(1)  | 9(1)  |
| C(30) | 22(1) | 23(1) | 25(1)  | -9(1) | 8(1)  | 3(1)  |
| C(31) | 17(1) | 17(1) | 17(1)  | -3(1) | 1(1)  | 4(1)  |
| Cl(3) | 40(2) | 22(1) | 34(1)  | 5(1)  | -4(1) | 8(1)  |
| Cl(4) | 55(3) | 78(3) | 100(4) | 54(2) | 43(2) | 43(2) |
| C(32) | 24(3) | 32(3) | 46(4)  | 4(3)  | -3(3) | 4(2)  |

---

**Table 5.** Hydrogen coordinates ( $\times 10^4$ ) and isotropic displacement parameters ( $\text{\AA}^2 \times 10^{-3}$ ) for **Complex 1**.

|        | x    | y     | z    | U(eq) |
|--------|------|-------|------|-------|
| H(2)   | 1392 | 4077  | 658  | 21    |
| H(3)   | -369 | 5012  | 1088 | 27    |
| H(4)   | 535  | 6528  | 2179 | 22    |
| H(6A)  | 4070 | 7183  | 3593 | 16    |
| H(6B)  | 2646 | 7677  | 3284 | 16    |
| H(8)   | 1515 | 8551  | 2301 | 18    |
| H(9)   | 100  | 9536  | 1389 | 20    |
| H(10)  | 1336 | 10834 | 332  | 21    |
| H(11)  | 4012 | 11155 | 187  | 20    |
| H(12)  | 5429 | 10163 | 1078 | 18    |
| H(14)  | 4093 | 10392 | 3406 | 19    |
| H(15)  | 5422 | 11778 | 4532 | 22    |
| H(16)  | 7921 | 11846 | 5198 | 22    |
| H(17)  | 9046 | 10478 | 4787 | 25    |
| H(18)  | 7768 | 9112  | 3625 | 22    |
| H(19A) | 5144 | 5045  | 790  | 15    |
| H(19B) | 3960 | 3812  | 895  | 15    |
| H(20)  | 3306 | 2210  | 2093 | 12    |
| H(21)  | 1533 | 1168  | 3048 | 22    |
| H(22)  | 1527 | 1865  | 4547 | 25    |
| H(23)  | 3341 | 3572  | 5078 | 27    |
| H(24)  | 5146 | 4605  | 4104 | 21    |
| H(27)  | 7553 | 2995  | 3064 | 27    |
| H(28)  | 8964 | 1850  | 2555 | 33    |
| H(29)  | 9057 | 1583  | 969  | 32    |
| H(30)  | 7695 | 2420  | -111 | 29    |
| H(31)  | 6237 | 3540  | 389  | 21    |
| H(32A) | 267  | 3852  | 4584 | 43    |
| H(32B) | -280 | 4713  | 3911 | 43    |

**Table 6.** Torsion angles [°] for **Complex 1**.

---

|                        |             |
|------------------------|-------------|
| Au(1)-P(1)-C(6)-C(5)   | -46.53(18)  |
| Au(1)-P(1)-C(7)-C(8)   | 135.85(18)  |
| Au(1)-P(1)-C(7)-C(12)  | -47.6(2)    |
| Au(1)-P(1)-C(13)-C(14) | 153.89(17)  |
| Au(1)-P(1)-C(13)-C(18) | -24.9(2)    |
| Au(2)-P(2)-C(19)-C(1)  | -70.69(17)  |
| Au(2)-P(2)-C(25)-C(20) | -178.45(17) |
| Au(2)-P(2)-C(25)-C(24) | 4.6(2)      |
| Au(2)-P(2)-C(26)-C(27) | 67.5(2)     |
| Au(2)-P(2)-C(26)-C(31) | -109.0(2)   |
| P(1)-C(7)-C(8)-C(9)    | 176.99(19)  |
| P(1)-C(7)-C(12)-C(11)  | -176.78(19) |
| P(1)-C(13)-C(14)-C(15) | -177.45(19) |
| P(1)-C(13)-C(18)-C(17) | 178.5(2)    |
| P(2)-C(26)-C(27)-C(28) | -176.6(2)   |
| P(2)-C(26)-C(31)-C(30) | 175.8(2)    |
| N(1)-C(1)-C(2)-C(3)    | 1.3(4)      |
| N(1)-C(1)-C(19)-P(2)   | 43.5(3)     |
| N(1)-C(5)-C(6)-P(1)    | 69.2(2)     |
| C(1)-N(1)-C(5)-C(4)    | 0.2(3)      |
| C(1)-N(1)-C(5)-C(6)    | -176.6(2)   |
| C(1)-C(2)-C(3)-C(4)    | -0.3(4)     |
| C(2)-C(1)-C(19)-P(2)   | -138.2(2)   |
| C(2)-C(3)-C(4)-C(5)    | -0.7(4)     |
| C(3)-C(4)-C(5)-N(1)    | 0.8(4)      |
| C(3)-C(4)-C(5)-C(6)    | 177.3(2)    |
| C(4)-C(5)-C(6)-P(1)    | -107.5(2)   |
| C(5)-N(1)-C(1)-C(2)    | -1.3(3)     |
| C(5)-N(1)-C(1)-C(19)   | 177.1(2)    |
| C(6)-P(1)-C(7)-C(8)    | 14.9(2)     |
| C(6)-P(1)-C(7)-C(12)   | -168.51(18) |
| C(6)-P(1)-C(13)-C(14)  | -84.4(2)    |
| C(6)-P(1)-C(13)-C(18)  | 96.8(2)     |
| C(7)-P(1)-C(6)-C(5)    | 77.38(18)   |
| C(7)-P(1)-C(13)-C(14)  | 27.7(2)     |
| C(7)-P(1)-C(13)-C(18)  | -151.0(2)   |
| C(7)-C(8)-C(9)-C(10)   | -0.4(4)     |

|                         |             |
|-------------------------|-------------|
| C(8)-C(7)-C(12)-C(11)   | 0.0(4)      |
| C(8)-C(9)-C(10)-C(11)   | -0.1(4)     |
| C(9)-C(10)-C(11)-C(12)  | 0.5(4)      |
| C(10)-C(11)-C(12)-C(7)  | -0.4(4)     |
| C(12)-C(7)-C(8)-C(9)    | 0.5(4)      |
| C(13)-P(1)-C(6)-C(5)    | -172.30(16) |
| C(13)-P(1)-C(7)-C(8)    | -96.9(2)    |
| C(13)-P(1)-C(7)-C(12)   | 79.7(2)     |
| C(13)-C(14)-C(15)-C(16) | -0.5(4)     |
| C(14)-C(13)-C(18)-C(17) | -0.3(4)     |
| C(14)-C(15)-C(16)-C(17) | -1.4(4)     |
| C(15)-C(16)-C(17)-C(18) | 2.5(4)      |
| C(16)-C(17)-C(18)-C(13) | -1.6(4)     |
| C(18)-C(13)-C(14)-C(15) | 1.3(4)      |
| C(19)-P(2)-C(25)-C(20)  | 55.6(2)     |
| C(19)-P(2)-C(25)-C(24)  | -121.3(2)   |
| C(19)-P(2)-C(26)-C(27)  | -167.3(2)   |
| C(19)-P(2)-C(26)-C(31)  | 16.2(2)     |
| C(19)-C(1)-C(2)-C(3)    | -176.9(2)   |
| C(20)-C(21)-C(22)-C(23) | -0.7(4)     |
| C(21)-C(20)-C(25)-P(2)  | -177.92(19) |
| C(21)-C(20)-C(25)-C(24) | -0.9(4)     |
| C(21)-C(22)-C(23)-C(24) | 0.4(4)      |
| C(22)-C(23)-C(24)-C(25) | -0.3(4)     |
| C(23)-C(24)-C(25)-P(2)  | 177.6(2)    |
| C(23)-C(24)-C(25)-C(20) | 0.5(4)      |
| C(25)-P(2)-C(19)-C(1)   | 54.52(19)   |
| C(25)-P(2)-C(26)-C(27)  | -57.7(2)    |
| C(25)-P(2)-C(26)-C(31)  | 125.7(2)    |
| C(25)-C(20)-C(21)-C(22) | 1.0(4)      |
| C(26)-P(2)-C(19)-C(1)   | 165.60(16)  |
| C(26)-P(2)-C(25)-C(20)  | -53.9(2)    |
| C(26)-P(2)-C(25)-C(24)  | 129.2(2)    |
| C(26)-C(27)-C(28)-C(29) | 0.7(4)      |
| C(27)-C(26)-C(31)-C(30) | -0.7(4)     |
| C(27)-C(28)-C(29)-C(30) | -0.8(4)     |
| C(28)-C(29)-C(30)-C(31) | 0.1(4)      |
| C(29)-C(30)-C(31)-C(26) | 0.6(4)      |
| C(31)-C(26)-C(27)-C(28) | 0.1(4)      |

---

Symmetry transformations used to generate equivalent atoms:

### Complex 2

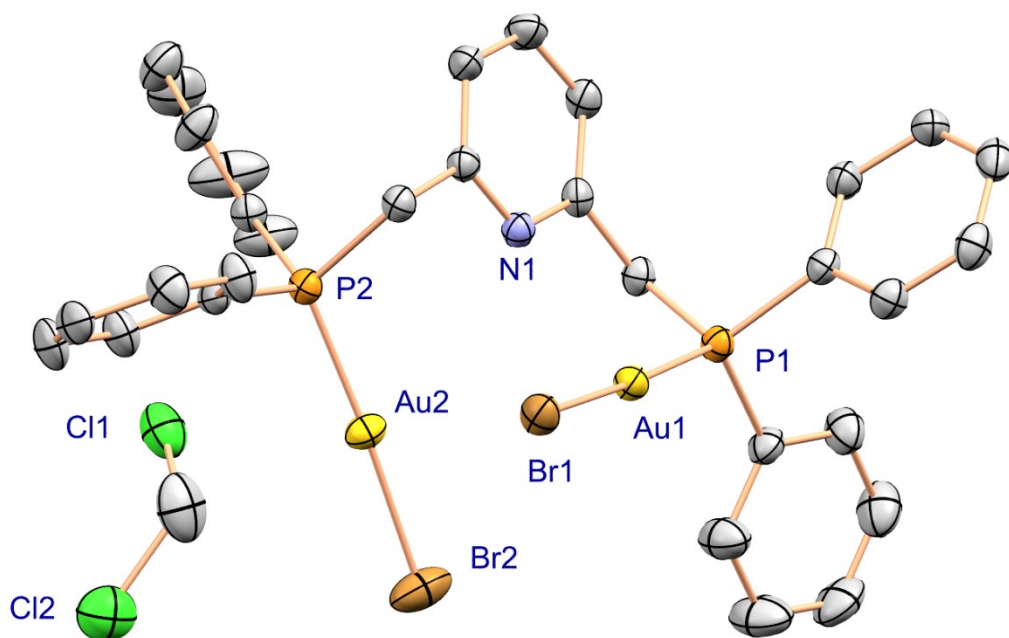

**Table 1.** Crystal data and structure refinement for **Complex 2**

|                                   |                                                                                                  |                   |
|-----------------------------------|--------------------------------------------------------------------------------------------------|-------------------|
| Identification code               | <b>Complex 2</b>                                                                                 |                   |
| Empirical formula                 | C <sub>32</sub> H <sub>29</sub> Au <sub>2</sub> Br <sub>2</sub> Cl <sub>2</sub> N P <sub>2</sub> |                   |
| Formula weight                    | 1114.15                                                                                          |                   |
| Temperature                       | 150.0 K                                                                                          |                   |
| Wavelength                        | 0.71073 Å                                                                                        |                   |
| Crystal system                    | Monoclinic                                                                                       |                   |
| Space group                       | P2 <sub>1</sub> /c                                                                               |                   |
| Unit cell dimensions              | a = 15.7361(4) Å                                                                                 | α = 90°.          |
|                                   | b = 12.8876(3) Å                                                                                 | β = 90.4110(10)°. |
|                                   | c = 16.5348(4) Å                                                                                 | γ = 90°.          |
| Volume                            | 3353.18(14) Å <sup>3</sup>                                                                       |                   |
| Z                                 | 4                                                                                                |                   |
| Density (calculated)              | 2.207 Mg/m <sup>3</sup>                                                                          |                   |
| Absorption coefficient            | 11.402 mm <sup>-1</sup>                                                                          |                   |
| F(000)                            | 2080                                                                                             |                   |
| Crystal size                      | 0.45 x 0.09 x 0.035 mm <sup>3</sup>                                                              |                   |
| Theta range for data collection   | 2.381 to 30.080°.                                                                                |                   |
| Index ranges                      | -22 ≤ h ≤ 22, -18 ≤ k ≤ 18, -23 ≤ l ≤ 23                                                         |                   |
| Reflections collected             | 91509                                                                                            |                   |
| Independent reflections           | 9836 [R(int) = 0.0579]                                                                           |                   |
| Completeness to theta = 25.242°   | 99.9 %                                                                                           |                   |
| Absorption correction             | Semi-empirical from equivalents                                                                  |                   |
| Max. and min. transmission        | 0.0990 and 0.0403                                                                                |                   |
| Refinement method                 | Full-matrix least-squares on F <sup>2</sup>                                                      |                   |
| Data / restraints / parameters    | 9836 / 0 / 370                                                                                   |                   |
| Goodness-of-fit on F <sup>2</sup> | 1.051                                                                                            |                   |
| Final R indices [I > 2σ(I)]       | R1 = 0.0289, wR2 = 0.0691                                                                        |                   |
| R indices (all data)              | R1 = 0.0382, wR2 = 0.0732                                                                        |                   |
| Extinction coefficient            | n/a                                                                                              |                   |
| Largest diff. peak and hole       | 1.755 and -1.748 e.Å <sup>-3</sup>                                                               |                   |

**Table 2.** Atomic coordinates ( $\times 10^4$ ) and equivalent isotropic displacement parameters ( $\text{\AA}^2 \times 10^3$ ) for **Complex 2**.  $U(\text{eq})$  is defined as one third of the trace of the orthogonalized  $U^{ij}$  tensor.

|       | x       | y        | z       | $U(\text{eq})$ |
|-------|---------|----------|---------|----------------|
| Au(1) | 1562(1) | 7697(1)  | 5555(1) | 24(1)          |
| Au(2) | 2781(1) | 5219(1)  | 5951(1) | 28(1)          |
| Br(1) | 713(1)  | 6614(1)  | 6423(1) | 32(1)          |
| Br(2) | 3674(1) | 6232(1)  | 6835(1) | 50(1)          |
| P(1)  | 2285(1) | 8689(1)  | 4688(1) | 23(1)          |
| P(2)  | 2004(1) | 4196(1)  | 5145(1) | 22(1)          |
| N(1)  | 1991(2) | 6349(3)  | 4208(2) | 23(1)          |
| C(1)  | 1488(3) | 5564(3)  | 3968(2) | 23(1)          |
| C(2)  | 1295(3) | 5390(4)  | 3155(3) | 30(1)          |
| C(3)  | 1639(3) | 6043(4)  | 2587(3) | 34(1)          |
| C(4)  | 2151(3) | 6863(4)  | 2829(3) | 28(1)          |
| C(5)  | 2311(3) | 6987(3)  | 3647(3) | 23(1)          |
| C(6)  | 2851(3) | 7864(3)  | 3974(3) | 24(1)          |
| C(7)  | 3098(3) | 9532(4)  | 5115(3) | 28(1)          |
| C(8)  | 3386(3) | 10391(4) | 4687(4) | 39(1)          |
| C(9)  | 4024(4) | 11012(5) | 5013(4) | 48(1)          |
| C(10) | 4370(4) | 10804(5) | 5759(4) | 52(2)          |
| C(11) | 4081(5) | 9949(6)  | 6184(4) | 59(2)          |
| C(12) | 3449(4) | 9312(5)  | 5864(3) | 46(1)          |
| C(13) | 1610(3) | 9547(3)  | 4096(3) | 24(1)          |
| C(14) | 1655(3) | 9641(4)  | 3261(3) | 29(1)          |
| C(15) | 1143(3) | 10357(4) | 2857(3) | 32(1)          |
| C(16) | 585(3)  | 10976(4) | 3278(3) | 34(1)          |
| C(17) | 532(3)  | 10878(4) | 4122(3) | 33(1)          |
| C(18) | 1036(3) | 10174(4) | 4524(3) | 29(1)          |
| C(19) | 1141(3) | 4876(3)  | 4621(3) | 24(1)          |
| C(20) | 2588(3) | 3602(3)  | 4322(3) | 26(1)          |
| C(21) | 2204(4) | 2836(4)  | 3848(3) | 36(1)          |
| C(22) | 2615(4) | 2454(4)  | 3177(3) | 42(1)          |
| C(23) | 3415(4) | 2811(5)  | 2987(4) | 51(2)          |
| C(24) | 3791(4) | 3569(7)  | 3449(4) | 64(2)          |
| C(25) | 3382(3) | 3975(5)  | 4120(3) | 46(1)          |
| C(26) | 1481(3) | 3148(3)  | 5679(2) | 24(1)          |
| C(27) | 623(3)  | 3189(4)  | 5858(3) | 35(1)          |



|       |         |         |         |       |
|-------|---------|---------|---------|-------|
| C(28) | 238(3)  | 2397(4) | 6290(3) | 37(1) |
| C(29) | 710(4)  | 1567(4) | 6550(3) | 36(1) |
| C(30) | 1573(4) | 1518(4) | 6384(3) | 41(1) |
| C(31) | 1960(3) | 2318(4) | 5957(3) | 36(1) |
| Cl(1) | 5346(1) | 3605(1) | 5143(1) | 51(1) |
| Cl(2) | 5342(1) | 3295(2) | 6900(1) | 59(1) |
| C(32) | 4806(4) | 3809(6) | 6051(5) | 60(2) |

---

**Table 3.** Bond lengths [Å] and angles [°] for **Complex 2**

---

|             |            |
|-------------|------------|
| Au(1)-Br(1) | 2.4127(5)  |
| Au(1)-P(1)  | 2.2387(11) |
| Au(2)-Br(2) | 2.4058(6)  |
| Au(2)-P(2)  | 2.2323(11) |
| P(1)-C(6)   | 1.824(4)   |
| P(1)-C(7)   | 1.818(5)   |
| P(1)-C(13)  | 1.815(4)   |
| P(2)-C(19)  | 1.828(4)   |
| P(2)-C(20)  | 1.817(4)   |
| P(2)-C(26)  | 1.814(4)   |
| N(1)-C(1)   | 1.342(6)   |
| N(1)-C(5)   | 1.340(5)   |
| C(1)-C(2)   | 1.395(6)   |
| C(1)-C(19)  | 1.503(6)   |
| C(2)-H(2)   | 0.9500     |
| C(2)-C(3)   | 1.375(7)   |
| C(3)-H(3)   | 0.9500     |
| C(3)-C(4)   | 1.386(7)   |
| C(4)-H(4)   | 0.9500     |
| C(4)-C(5)   | 1.383(6)   |
| C(5)-C(6)   | 1.513(6)   |
| C(6)-H(6A)  | 0.9900     |
| C(6)-H(6B)  | 0.9900     |
| C(7)-C(8)   | 1.391(7)   |
| C(7)-C(12)  | 1.382(7)   |
| C(8)-H(8)   | 0.9500     |
| C(8)-C(9)   | 1.389(8)   |
| C(9)-H(9)   | 0.9500     |
| C(9)-C(10)  | 1.372(9)   |
| C(10)-H(10) | 0.9500     |
| C(10)-C(11) | 1.384(10)  |
| C(11)-H(11) | 0.9500     |
| C(11)-C(12) | 1.391(8)   |
| C(12)-H(12) | 0.9500     |
| C(13)-C(14) | 1.388(6)   |
| C(13)-C(18) | 1.407(6)   |
| C(14)-H(14) | 0.9500     |

|                  |           |
|------------------|-----------|
| C(14)-C(15)      | 1.393(7)  |
| C(15)-H(15)      | 0.9500    |
| C(15)-C(16)      | 1.378(7)  |
| C(16)-H(16)      | 0.9500    |
| C(16)-C(17)      | 1.404(7)  |
| C(17)-H(17)      | 0.9500    |
| C(17)-C(18)      | 1.373(7)  |
| C(18)-H(18)      | 0.9500    |
| C(19)-H(19A)     | 0.9900    |
| C(19)-H(19B)     | 0.9900    |
| C(20)-C(21)      | 1.395(7)  |
| C(20)-C(25)      | 1.383(7)  |
| C(21)-H(21)      | 0.9500    |
| C(21)-C(22)      | 1.380(7)  |
| C(22)-H(22)      | 0.9500    |
| C(22)-C(23)      | 1.379(8)  |
| C(23)-H(23)      | 0.9500    |
| C(23)-C(24)      | 1.372(9)  |
| C(24)-H(24)      | 0.9500    |
| C(24)-C(25)      | 1.389(8)  |
| C(25)-H(25)      | 0.9500    |
| C(26)-C(27)      | 1.385(6)  |
| C(26)-C(31)      | 1.385(7)  |
| C(27)-H(27)      | 0.9500    |
| C(27)-C(28)      | 1.388(7)  |
| C(28)-H(28)      | 0.9500    |
| C(28)-C(29)      | 1.370(7)  |
| C(29)-H(29)      | 0.9500    |
| C(29)-C(30)      | 1.389(8)  |
| C(30)-H(30)      | 0.9500    |
| C(30)-C(31)      | 1.392(7)  |
| C(31)-H(31)      | 0.9500    |
| Cl(1)-C(32)      | 1.749(7)  |
| Cl(2)-C(32)      | 1.763(7)  |
| C(32)-H(32A)     | 0.9900    |
| C(32)-H(32B)     | 0.9900    |
| P(1)-Au(1)-Br(1) | 176.30(3) |
| P(2)-Au(2)-Br(2) | 176.50(3) |

|                  |            |
|------------------|------------|
| C(6)-P(1)-Au(1)  | 109.49(14) |
| C(7)-P(1)-Au(1)  | 116.87(16) |
| C(7)-P(1)-C(6)   | 104.8(2)   |
| C(13)-P(1)-Au(1) | 113.26(15) |
| C(13)-P(1)-C(6)  | 107.0(2)   |
| C(13)-P(1)-C(7)  | 104.7(2)   |
| C(19)-P(2)-Au(2) | 113.69(15) |
| C(20)-P(2)-Au(2) | 114.72(15) |
| C(20)-P(2)-C(19) | 103.0(2)   |
| C(26)-P(2)-Au(2) | 113.39(14) |
| C(26)-P(2)-C(19) | 104.4(2)   |
| C(26)-P(2)-C(20) | 106.5(2)   |
| C(5)-N(1)-C(1)   | 118.8(4)   |
| N(1)-C(1)-C(2)   | 122.0(4)   |
| N(1)-C(1)-C(19)  | 116.7(4)   |
| C(2)-C(1)-C(19)  | 121.3(4)   |
| C(1)-C(2)-H(2)   | 120.8      |
| C(3)-C(2)-C(1)   | 118.4(4)   |
| C(3)-C(2)-H(2)   | 120.8      |
| C(2)-C(3)-H(3)   | 120.0      |
| C(2)-C(3)-C(4)   | 120.1(4)   |
| C(4)-C(3)-H(3)   | 120.0      |
| C(3)-C(4)-H(4)   | 120.9      |
| C(5)-C(4)-C(3)   | 118.1(4)   |
| C(5)-C(4)-H(4)   | 120.9      |
| N(1)-C(5)-C(4)   | 122.7(4)   |
| N(1)-C(5)-C(6)   | 115.1(4)   |
| C(4)-C(5)-C(6)   | 122.3(4)   |
| P(1)-C(6)-H(6A)  | 109.0      |
| P(1)-C(6)-H(6B)  | 109.0      |
| C(5)-C(6)-P(1)   | 113.1(3)   |
| C(5)-C(6)-H(6A)  | 109.0      |
| C(5)-C(6)-H(6B)  | 109.0      |
| H(6A)-C(6)-H(6B) | 107.8      |
| C(8)-C(7)-P(1)   | 120.6(4)   |
| C(12)-C(7)-P(1)  | 120.1(4)   |
| C(12)-C(7)-C(8)  | 119.3(5)   |
| C(7)-C(8)-H(8)   | 120.1      |
| C(9)-C(8)-C(7)   | 119.9(5)   |

|                     |          |
|---------------------|----------|
| C(9)-C(8)-H(8)      | 120.1    |
| C(8)-C(9)-H(9)      | 119.4    |
| C(10)-C(9)-C(8)     | 121.1(6) |
| C(10)-C(9)-H(9)     | 119.4    |
| C(9)-C(10)-H(10)    | 120.6    |
| C(9)-C(10)-C(11)    | 118.8(5) |
| C(11)-C(10)-H(10)   | 120.6    |
| C(10)-C(11)-H(11)   | 119.5    |
| C(10)-C(11)-C(12)   | 120.9(6) |
| C(12)-C(11)-H(11)   | 119.5    |
| C(7)-C(12)-C(11)    | 119.9(6) |
| C(7)-C(12)-H(12)    | 120.0    |
| C(11)-C(12)-H(12)   | 120.0    |
| C(14)-C(13)-P(1)    | 123.7(3) |
| C(14)-C(13)-C(18)   | 119.2(4) |
| C(18)-C(13)-P(1)    | 117.0(3) |
| C(13)-C(14)-H(14)   | 120.0    |
| C(13)-C(14)-C(15)   | 120.1(4) |
| C(15)-C(14)-H(14)   | 120.0    |
| C(14)-C(15)-H(15)   | 119.7    |
| C(16)-C(15)-C(14)   | 120.6(4) |
| C(16)-C(15)-H(15)   | 119.7    |
| C(15)-C(16)-H(16)   | 120.2    |
| C(15)-C(16)-C(17)   | 119.5(4) |
| C(17)-C(16)-H(16)   | 120.2    |
| C(16)-C(17)-H(17)   | 119.9    |
| C(18)-C(17)-C(16)   | 120.1(4) |
| C(18)-C(17)-H(17)   | 119.9    |
| C(13)-C(18)-H(18)   | 119.8    |
| C(17)-C(18)-C(13)   | 120.4(4) |
| C(17)-C(18)-H(18)   | 119.8    |
| P(2)-C(19)-H(19A)   | 109.5    |
| P(2)-C(19)-H(19B)   | 109.5    |
| C(1)-C(19)-P(2)     | 110.6(3) |
| C(1)-C(19)-H(19A)   | 109.5    |
| C(1)-C(19)-H(19B)   | 109.5    |
| H(19A)-C(19)-H(19B) | 108.1    |
| C(21)-C(20)-P(2)    | 120.0(3) |
| C(25)-C(20)-P(2)    | 119.8(4) |

|                    |          |
|--------------------|----------|
| C(25)-C(20)-C(21)  | 119.9(4) |
| C(20)-C(21)-H(21)  | 119.9    |
| C(22)-C(21)-C(20)  | 120.1(5) |
| C(22)-C(21)-H(21)  | 119.9    |
| C(21)-C(22)-H(22)  | 120.1    |
| C(23)-C(22)-C(21)  | 119.8(5) |
| C(23)-C(22)-H(22)  | 120.1    |
| C(22)-C(23)-H(23)  | 119.9    |
| C(24)-C(23)-C(22)  | 120.2(5) |
| C(24)-C(23)-H(23)  | 119.9    |
| C(23)-C(24)-H(24)  | 119.6    |
| C(23)-C(24)-C(25)  | 120.8(6) |
| C(25)-C(24)-H(24)  | 119.6    |
| C(20)-C(25)-C(24)  | 119.1(5) |
| C(20)-C(25)-H(25)  | 120.4    |
| C(24)-C(25)-H(25)  | 120.4    |
| C(27)-C(26)-P(2)   | 121.5(3) |
| C(31)-C(26)-P(2)   | 119.3(4) |
| C(31)-C(26)-C(27)  | 119.1(4) |
| C(26)-C(27)-H(27)  | 119.6    |
| C(26)-C(27)-C(28)  | 120.8(5) |
| C(28)-C(27)-H(27)  | 119.6    |
| C(27)-C(28)-H(28)  | 120.1    |
| C(29)-C(28)-C(27)  | 119.9(5) |
| C(29)-C(28)-H(28)  | 120.1    |
| C(28)-C(29)-H(29)  | 119.9    |
| C(28)-C(29)-C(30)  | 120.2(5) |
| C(30)-C(29)-H(29)  | 119.9    |
| C(29)-C(30)-H(30)  | 120.1    |
| C(29)-C(30)-C(31)  | 119.9(5) |
| C(31)-C(30)-H(30)  | 120.1    |
| C(26)-C(31)-C(30)  | 120.1(5) |
| C(26)-C(31)-H(31)  | 119.9    |
| C(30)-C(31)-H(31)  | 119.9    |
| Cl(1)-C(32)-Cl(2)  | 113.2(3) |
| Cl(1)-C(32)-H(32A) | 108.9    |
| Cl(1)-C(32)-H(32B) | 108.9    |
| Cl(2)-C(32)-H(32A) | 108.9    |
| Cl(2)-C(32)-H(32B) | 108.9    |

Symmetry transformations used to generate equivalent atoms:

**Table 4.** Anisotropic displacement parameters ( $\text{\AA}^2 \times 10^3$ ) for **Complex 2** The anisotropic displacement factor exponent takes the form:  $-2\pi^2 [ h^2 a^{*2} U^{11} + \dots + 2 h k a^* b^* U^{12} ]$

|       | U <sup>11</sup> | U <sup>22</sup> | U <sup>33</sup> | U <sup>23</sup> | U <sup>13</sup> | U <sup>12</sup> |
|-------|-----------------|-----------------|-----------------|-----------------|-----------------|-----------------|
| Au(1) | 28(1)           | 24(1)           | 21(1)           | 1(1)            | 3(1)            | -2(1)           |
| Au(2) | 25(1)           | 31(1)           | 29(1)           | -6(1)           | 1(1)            | -3(1)           |
| Br(1) | 39(1)           | 30(1)           | 28(1)           | 2(1)            | 6(1)            | -3(1)           |
| Br(2) | 33(1)           | 65(1)           | 53(1)           | -31(1)          | 3(1)            | -5(1)           |
| P(1)  | 25(1)           | 21(1)           | 23(1)           | 1(1)            | 2(1)            | -1(1)           |
| P(2)  | 22(1)           | 22(1)           | 23(1)           | 1(1)            | 2(1)            | -1(1)           |
| N(1)  | 26(2)           | 21(2)           | 22(2)           | 0(1)            | 2(1)            | 2(1)            |
| C(1)  | 25(2)           | 21(2)           | 24(2)           | 0(2)            | 1(2)            | 2(2)            |
| C(2)  | 41(3)           | 23(2)           | 25(2)           | -1(2)           | -2(2)           | -2(2)           |
| C(3)  | 46(3)           | 32(2)           | 22(2)           | 0(2)            | 1(2)            | -5(2)           |
| C(4)  | 32(2)           | 25(2)           | 26(2)           | 1(2)            | 7(2)            | -1(2)           |
| C(5)  | 24(2)           | 19(2)           | 26(2)           | 2(2)            | 4(2)            | 2(2)            |
| C(6)  | 24(2)           | 22(2)           | 27(2)           | 0(2)            | 4(2)            | 0(2)            |
| C(7)  | 28(2)           | 23(2)           | 34(2)           | -4(2)           | -3(2)           | -4(2)           |
| C(8)  | 38(3)           | 31(3)           | 48(3)           | 6(2)            | -5(2)           | -6(2)           |
| C(9)  | 35(3)           | 36(3)           | 72(4)           | 3(3)            | -3(3)           | -7(2)           |
| C(10) | 45(3)           | 43(3)           | 68(4)           | -19(3)          | -8(3)           | -12(3)          |
| C(11) | 57(4)           | 72(5)           | 48(3)           | -3(3)           | -16(3)          | -22(3)          |
| C(12) | 51(3)           | 49(3)           | 39(3)           | 3(2)            | -9(2)           | -14(3)          |
| C(13) | 25(2)           | 21(2)           | 26(2)           | -2(2)           | 0(2)            | -2(2)           |
| C(14) | 34(2)           | 24(2)           | 28(2)           | -2(2)           | 1(2)            | 4(2)            |
| C(15) | 43(3)           | 27(2)           | 26(2)           | -1(2)           | -4(2)           | 1(2)            |
| C(16) | 31(2)           | 26(2)           | 46(3)           | 1(2)            | -8(2)           | 0(2)            |
| C(17) | 27(2)           | 28(2)           | 43(3)           | -4(2)           | 6(2)            | 2(2)            |
| C(18) | 28(2)           | 29(2)           | 30(2)           | -2(2)           | 5(2)            | 1(2)            |
| C(19) | 24(2)           | 23(2)           | 24(2)           | 0(2)            | 2(2)            | -1(2)           |
| C(20) | 25(2)           | 25(2)           | 26(2)           | 2(2)            | 3(2)            | 1(2)            |
| C(21) | 44(3)           | 28(2)           | 38(3)           | -6(2)           | 13(2)           | -10(2)          |
| C(22) | 52(3)           | 33(3)           | 41(3)           | -9(2)           | 12(2)           | -4(2)           |

|       |       |        |       |        |       |        |
|-------|-------|--------|-------|--------|-------|--------|
| C(23) | 45(3) | 66(4)  | 42(3) | -14(3) | 14(2) | 8(3)   |
| C(24) | 34(3) | 113(6) | 46(3) | -29(4) | 13(3) | -17(3) |
| C(25) | 30(3) | 71(4)  | 37(3) | -16(3) | 5(2)  | -10(3) |
| C(26) | 31(2) | 21(2)  | 20(2) | 2(2)   | -1(2) | -6(2)  |
| C(27) | 33(2) | 32(3)  | 41(3) | 11(2)  | 6(2)  | 1(2)   |
| C(28) | 34(3) | 37(3)  | 41(3) | 10(2)  | 4(2)  | -8(2)  |
| C(29) | 50(3) | 27(2)  | 30(2) | 10(2)  | 1(2)  | -10(2) |
| C(30) | 49(3) | 31(3)  | 43(3) | 16(2)  | 1(2)  | 4(2)   |
| C(31) | 38(3) | 32(2)  | 37(2) | 10(2)  | 3(2)  | 3(2)   |
| Cl(1) | 43(1) | 49(1)  | 60(1) | 11(1)  | -3(1) | 7(1)   |
| Cl(2) | 49(1) | 73(1)  | 55(1) | -6(1)  | 9(1)  | 7(1)   |
| C(32) | 41(3) | 59(4)  | 81(5) | 11(4)  | 16(3) | 19(3)  |

---



**Table 5.** Hydrogen coordinates ( $\times 10^4$ ) and isotropic displacement parameters ( $\text{\AA}^2 \times 10^{-3}$ ) for **Complex 2**

|        | x    | y     | z    | U(eq) |
|--------|------|-------|------|-------|
| H(2)   | 936  | 4832  | 2997 | 36    |
| H(3)   | 1526 | 5933  | 2029 | 40    |
| H(4)   | 2386 | 7326  | 2444 | 33    |
| H(6A)  | 3049 | 8295  | 3517 | 29    |
| H(6B)  | 3358 | 7569  | 4247 | 29    |
| H(8)   | 3148 | 10552 | 4173 | 47    |
| H(9)   | 4224 | 11591 | 4714 | 57    |
| H(10)  | 4800 | 11238 | 5981 | 62    |
| H(11)  | 4318 | 9796  | 6700 | 71    |
| H(12)  | 3259 | 8726  | 6161 | 55    |
| H(14)  | 2037 | 9217  | 2965 | 34    |
| H(15)  | 1178 | 10419 | 2286 | 39    |
| H(16)  | 239  | 11464 | 3000 | 41    |
| H(17)  | 148  | 11301 | 4416 | 39    |
| H(18)  | 996  | 10110 | 5095 | 35    |
| H(19A) | 746  | 4363  | 4380 | 29    |
| H(19B) | 820  | 5300  | 5014 | 29    |
| H(21)  | 1659 | 2578  | 3987 | 44    |
| H(22)  | 2347 | 1946  | 2846 | 50    |
| H(23)  | 3707 | 2532  | 2536 | 61    |
| H(24)  | 4339 | 3820  | 3309 | 77    |
| H(25)  | 3645 | 4503  | 4436 | 55    |
| H(27)  | 294  | 3766  | 5682 | 42    |
| H(28)  | -352 | 2430  | 6406 | 45    |
| H(29)  | 446  | 1024  | 6844 | 43    |
| H(30)  | 1899 | 940   | 6563 | 49    |
| H(31)  | 2553 | 2294  | 5855 | 43    |
| H(32A) | 4236 | 3487  | 6010 | 73    |
| H(32B) | 4725 | 4564  | 6130 | 73    |

**Table 6.** Torsion angles [°] for **Complex 2**

---

|                        |           |
|------------------------|-----------|
| Au(1)-P(1)-C(6)-C(5)   | 44.8(3)   |
| Au(1)-P(1)-C(7)-C(8)   | -159.5(4) |
| Au(1)-P(1)-C(7)-C(12)  | 21.9(5)   |
| Au(1)-P(1)-C(13)-C(14) | -130.6(4) |
| Au(1)-P(1)-C(13)-C(18) | 51.9(4)   |
| Au(2)-P(2)-C(19)-C(1)  | 72.3(3)   |
| Au(2)-P(2)-C(20)-C(21) | 171.0(4)  |
| Au(2)-P(2)-C(20)-C(25) | -15.0(5)  |
| Au(2)-P(2)-C(26)-C(27) | 102.8(4)  |
| Au(2)-P(2)-C(26)-C(31) | -73.3(4)  |
| P(1)-C(7)-C(8)-C(9)    | -178.3(4) |
| P(1)-C(7)-C(12)-C(11)  | 178.9(5)  |
| P(1)-C(13)-C(14)-C(15) | -176.8(4) |
| P(1)-C(13)-C(18)-C(17) | 176.9(4)  |
| P(2)-C(20)-C(21)-C(22) | 173.9(4)  |
| P(2)-C(20)-C(25)-C(24) | -174.8(5) |
| P(2)-C(26)-C(27)-C(28) | -177.8(4) |
| P(2)-C(26)-C(31)-C(30) | 178.5(4)  |
| N(1)-C(1)-C(2)-C(3)    | 0.3(7)    |
| N(1)-C(1)-C(19)-P(2)   | -63.6(4)  |
| N(1)-C(5)-C(6)-P(1)    | -57.9(5)  |
| C(1)-N(1)-C(5)-C(4)    | -0.8(6)   |
| C(1)-N(1)-C(5)-C(6)    | 178.4(4)  |
| C(1)-C(2)-C(3)-C(4)    | -1.1(8)   |
| C(2)-C(1)-C(19)-P(2)   | 116.1(4)  |
| C(2)-C(3)-C(4)-C(5)    | 0.9(7)    |
| C(3)-C(4)-C(5)-N(1)    | 0.0(7)    |
| C(3)-C(4)-C(5)-C(6)    | -179.1(4) |
| C(4)-C(5)-C(6)-P(1)    | 121.3(4)  |
| C(5)-N(1)-C(1)-C(2)    | 0.7(6)    |
| C(5)-N(1)-C(1)-C(19)   | -179.6(4) |
| C(6)-P(1)-C(7)-C(8)    | 79.1(5)   |
| C(6)-P(1)-C(7)-C(12)   | -99.5(5)  |
| C(6)-P(1)-C(13)-C(14)  | -9.9(4)   |
| C(6)-P(1)-C(13)-C(18)  | 172.7(3)  |
| C(7)-P(1)-C(6)-C(5)    | 170.9(3)  |
| C(7)-P(1)-C(13)-C(14)  | 101.0(4)  |

|                         |           |
|-------------------------|-----------|
| C(7)-P(1)-C(13)-C(18)   | -76.5(4)  |
| C(7)-C(8)-C(9)-C(10)    | -0.9(9)   |
| C(8)-C(7)-C(12)-C(11)   | 0.3(9)    |
| C(8)-C(9)-C(10)-C(11)   | 0.9(10)   |
| C(9)-C(10)-C(11)-C(12)  | -0.2(11)  |
| C(10)-C(11)-C(12)-C(7)  | -0.4(11)  |
| C(12)-C(7)-C(8)-C(9)    | 0.3(8)    |
| C(13)-P(1)-C(6)-C(5)    | -78.4(3)  |
| C(13)-P(1)-C(7)-C(8)    | -33.4(5)  |
| C(13)-P(1)-C(7)-C(12)   | 148.0(4)  |
| C(13)-C(14)-C(15)-C(16) | -0.2(7)   |
| C(14)-C(13)-C(18)-C(17) | -0.7(7)   |
| C(14)-C(15)-C(16)-C(17) | -0.3(7)   |
| C(15)-C(16)-C(17)-C(18) | 0.2(7)    |
| C(16)-C(17)-C(18)-C(13) | 0.2(7)    |
| C(18)-C(13)-C(14)-C(15) | 0.7(7)    |
| C(19)-P(2)-C(20)-C(21)  | -65.0(4)  |
| C(19)-P(2)-C(20)-C(25)  | 109.1(5)  |
| C(19)-P(2)-C(26)-C(27)  | -21.5(4)  |
| C(19)-P(2)-C(26)-C(31)  | 162.4(4)  |
| C(19)-C(1)-C(2)-C(3)    | -179.4(4) |
| C(20)-P(2)-C(19)-C(1)   | -52.4(3)  |
| C(20)-P(2)-C(26)-C(27)  | -130.1(4) |
| C(20)-P(2)-C(26)-C(31)  | 53.8(4)   |
| C(20)-C(21)-C(22)-C(23) | 1.6(9)    |
| C(21)-C(20)-C(25)-C(24) | -0.8(9)   |
| C(21)-C(22)-C(23)-C(24) | -2.1(10)  |
| C(22)-C(23)-C(24)-C(25) | 1.1(12)   |
| C(23)-C(24)-C(25)-C(20) | 0.3(11)   |
| C(25)-C(20)-C(21)-C(22) | -0.2(8)   |
| C(26)-P(2)-C(19)-C(1)   | -163.6(3) |
| C(26)-P(2)-C(20)-C(21)  | 44.6(4)   |
| C(26)-P(2)-C(20)-C(25)  | -141.3(4) |
| C(26)-C(27)-C(28)-C(29) | 0.5(8)    |
| C(27)-C(26)-C(31)-C(30) | 2.3(8)    |
| C(27)-C(28)-C(29)-C(30) | 0.2(8)    |
| C(28)-C(29)-C(30)-C(31) | 0.3(8)    |
| C(29)-C(30)-C(31)-C(26) | -1.6(8)   |
| C(31)-C(26)-C(27)-C(28) | -1.7(8)   |

---

Symmetry transformations used to generate equivalent atoms:

**Table 7.** Hydrogen bonds for **Complex 2** [Å and °].

---

| D-H...A | d(D-H) | d(H...A) | d(D...A) | <(DHA) |
|---------|--------|----------|----------|--------|
|---------|--------|----------|----------|--------|

---

### Complex 3

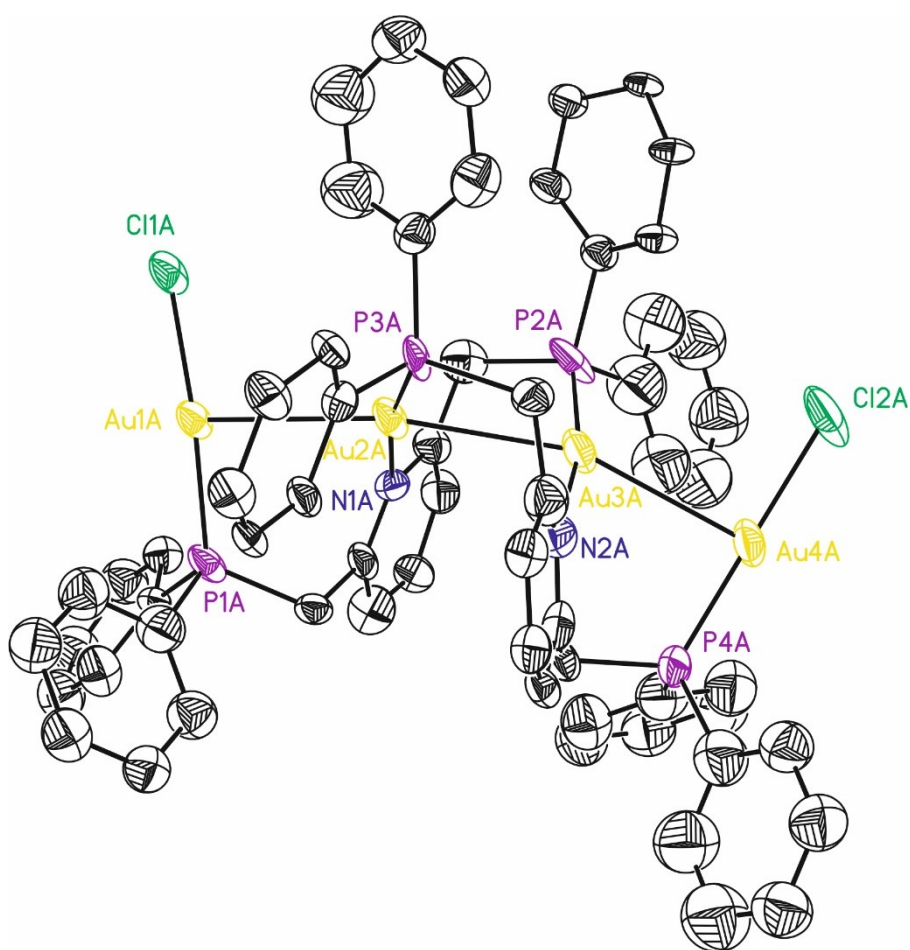

**Table 1.** Crystal data and structure refinement for **Complex 3**.

|                                   |                                                                                                                               |                |
|-----------------------------------|-------------------------------------------------------------------------------------------------------------------------------|----------------|
| Identification code               | <b>Complex 3</b>                                                                                                              |                |
| Empirical formula                 | C <sub>62</sub> H <sub>54</sub> Au <sub>4</sub> Cl <sub>2</sub> F <sub>12</sub> N <sub>2</sub> P <sub>4</sub> Sb <sub>2</sub> |                |
| Formula weight                    | 2281.21                                                                                                                       |                |
| Temperature                       | 100 K                                                                                                                         |                |
| Wavelength                        | 0.71073 Å                                                                                                                     |                |
| Crystal system                    | monoclinic                                                                                                                    |                |
| Space group                       | P 2 <sub>1</sub> /c                                                                                                           |                |
| Unit cell dimensions              | a = 24.072(5)Å                                                                                                                | α = 90°.       |
|                                   | b = 31.964(6)Å                                                                                                                | β = 97.06(3)°. |
|                                   | c = 20.304(4)Å                                                                                                                | γ = 90°.       |
| Volume                            | 15504(5) Å <sup>3</sup>                                                                                                       |                |
| Z                                 | 8                                                                                                                             |                |
| Density (calculated)              | 1.955 Mg/m <sup>3</sup>                                                                                                       |                |
| Absorption coefficient            | 8.444 mm <sup>-1</sup>                                                                                                        |                |
| F(000)                            | 8480                                                                                                                          |                |
| Crystal size                      | 0.100 x 0.050 x 0.005 mm <sup>3</sup>                                                                                         |                |
| Theta range for data collection   | 1.195 to 24.713°.                                                                                                             |                |
| Index ranges                      | -27 ≤ h ≤ 28, -37 ≤ k ≤ 37, -23 ≤ l ≤ 23                                                                                      |                |
| Reflections collected             | 238149                                                                                                                        |                |
| Independent reflections           | 26029 [R(int) = 0.2414]                                                                                                       |                |
| Completeness to theta = 24.713°   | 98.4%                                                                                                                         |                |
| Absorption correction             | Multi-scan                                                                                                                    |                |
| Max. and min. transmission        | 0.74 and 0.43                                                                                                                 |                |
| Refinement method                 | Full-matrix least-squares on F <sup>2</sup>                                                                                   |                |
| Data / restraints / parameters    | 26029 / 2558 / 1675                                                                                                           |                |
| Goodness-of-fit on F <sup>2</sup> | 1.588                                                                                                                         |                |
| Final R indices [I > 2σ(I)]       | R1 = 0.1273, wR2 = 0.3091                                                                                                     |                |
| R indices (all data)              | R1 = 0.1927, wR2 = 0.3367                                                                                                     |                |
| Largest diff. peak and hole       | 5.675 and -3.959 e.Å <sup>-3</sup>                                                                                            |                |

**Table 2.** Bond lengths [ $\text{\AA}$ ] and angles [ $^\circ$ ] for **Complex 3**.

Bond lengths----

|      |      |            |
|------|------|------------|
| Au1A | P1A  | 2.211(7)   |
| Au1A | Cl1A | 2.278(7)   |
| Au1A | Au2A | 3.0185(18) |
| Au2A | N1A  | 2.16(2)    |
| Au2A | P3A  | 2.243(8)   |
| Au2A | Au3A | 2.9518(18) |
| Au3A | N2A  | 2.17(2)    |
| Au3A | P2A  | 2.254(8)   |
| Au3A | Au4A | 2.9688(19) |
| Au4A | P4A  | 2.222(8)   |
| Au4A | Cl2A | 2.268(8)   |
| C1A  | N1A  | 1.29(3)    |
| C1A  | C2A  | 1.38(4)    |
| C1A  | C6A  | 1.61(3)    |
| C2A  | C3A  | 1.43(4)    |
| C2A  | H2A  | 0.9500     |
| C3A  | C4A  | 1.42(4)    |
| C3A  | H3A  | 0.9500     |
| C4A  | C5A  | 1.40(4)    |
| C4A  | H4A  | 0.9500     |
| C14A | C19A | 1.388(5)   |
| C14A | C15A | 1.389(4)   |
| C14A | P1A  | 1.803(19)  |
| C15A | C16A | 1.389(4)   |
| C15A | H15A | 0.9500     |
| C16A | C17A | 1.389(4)   |
| C16A | H16A | 0.9500     |
| C17A | C18A | 1.389(4)   |
| C17A | H17A | 0.9500     |
| C18A | C19A | 1.388(4)   |
| C18A | H18A | 0.9500     |
| C19A | H19A | 0.9500     |
| C20A | C25A | 1.389(5)   |
| C20A | C21A | 1.389(4)   |
| C20A | P2A  | 1.81(3)    |
| C21A | C22A | 1.390(4)   |

C21A H21A 0.9500  
C22A C23A 1.390(4)  
C22A H22A 0.9500  
C23A C24A 1.388(4)  
C23A H23A 0.9500  
C24A C25A 1.390(4)  
C24A H24A 0.9500  
C25A H25A 0.9500  
C20' C25' 1.389(5)  
C20' C21' 1.389(4)  
C20' P2A 1.95(3)  
C21' C22' 1.390(4)  
C21' H21' 0.9500  
C22' C23' 1.390(4)  
C22' H22' 0.9500  
C23' C24' 1.390(4)  
C23' H23' 0.9500  
C24' C25' 1.390(4)  
C24' H24' 0.9500  
C25' H25' 0.9500  
C26A C27A 1.3900  
C26A C31A 1.3900  
C26A P2A 1.81(2)  
C27A C28A 1.3900  
C27A H27A 0.9500  
C28A C29A 1.3900  
C28A H28A 0.9500  
C29A C30A 1.3900  
C29A H29A 0.9500  
C30A C31A 1.3900  
C30A H30A 0.9500  
C31A H31A 0.9500  
N2A C32A 1.26(3)  
N2A C36A 1.34(3)  
C32A C33A 1.42(4)  
C32A C37A 1.495(10)  
C33A C34A 1.36(4)  
C33A H33A 0.9500  
C34A C35A 1.32(3)

C34A H34A 0.9500  
C35A C36A 1.46(4)  
C35A H35A 0.9500  
C36A C38A 1.42(4)  
C37A P3A 1.84(3)  
C37A H37A 0.9900  
C37A H37B 0.9900  
C38A P4A 1.86(3)  
C38A H38A 0.9900  
C38A H38B 0.9900  
C39A C44A 1.388(5)  
C39A C40A 1.389(4)  
C39A P3A 1.801(19)  
C40A C41A 1.389(4)  
C40A H40A 0.9500  
C41A C42A 1.389(4)  
C41A H41A 0.9500  
C42A C43A 1.389(4)  
C42A H42A 0.9500  
C43A C44A 1.389(4)  
C43A H43A 0.9500  
C44A H44A 0.9500  
C46A C45A 1.39(3)  
C46A C47A 1.46(3)  
C46A H46A 0.9500  
C47A C48A 1.41(4)  
C47A H47A 0.9500  
C48A C49A 1.32(3)  
C48A H48A 0.9500  
C49A C50A 1.38(3)  
C49A H49A 0.9500  
C50A C45A 1.44(3)  
C50A H50A 0.9500  
C51A C52A 1.3900  
C51A C56A 1.3900  
C51A P4A 1.804(19)  
C52A C53A 1.3900  
C52A H52A 0.9500  
C53A C54A 1.3900



C53A H53A 0.9500  
C54A C55A 1.3900  
C54A H54A 0.9500  
C55A C56A 1.3900  
C55A H55A 0.9500  
C56A H56A 0.9500  
C57A C58A 1.3900  
C57A C63A 1.3900  
C57A P4A 1.802(19)  
C58A C59A 1.3900  
C58A H58A 0.9500  
C59A C60A 1.3900  
C59A H59A 0.9500  
C60A C62A 1.3900  
C60A H60A 0.9500  
C62A C63A 1.3900  
C62A H62A 0.9500  
C63A H63A 0.9500  
N1A C5A 1.41(3)  
Au1B P1B 2.250(7)  
Au1B Cl1B 2.279(7)  
Au1B Au2B 3.0132(18)  
Au2B N1B 2.12(2)  
Au2B P3B 2.237(9)  
Au2B Au3B 2.9813(18)  
Au3B N2B 2.175(18)  
Au3B P2B 2.261(8)  
Au3B Au4B 2.9605(18)  
Au4B P4B 2.230(8)  
Au4B Cl2B 2.289(7)  
C4B C5B 1.385(10)  
C4B C3B 1.39(4)  
C4B H4B 0.9500  
C3B C2B 1.27(4)  
C3B H3B 0.9500  
C2B C1B 1.30(4)  
C2B H2B 0.9500  
C1B N1B 1.46(3)  
C1B C6B 1.47(4)

C8B C13B 1.388(5)  
C8B C9B 1.390(4)  
C8B P1B 1.81(2)  
C9B C10B 1.389(4)  
C9B H9B 0.9500  
C10B C11B 1.389(4)  
C10B H10B 0.9500  
C11B C12B 1.389(4)  
C11B H11B 0.9500  
C12B C13B 1.389(4)  
C12B H12B 0.9500  
C13B H13B 0.9500  
C14B C19B 1.3900  
C14B C15B 1.3900  
C14B P1B 1.823(16)  
C19B C18B 1.3900  
C19B H19B 0.9500  
C18B C17B 1.3900  
C18B H18B 0.9500  
C17B C16B 1.3900  
C17B H17B 0.9500  
C16B C15B 1.3900  
C16B H16B 0.9500  
C15B H15B 0.9500  
C33B C32B 1.37(4)  
C33B C34B 1.45(4)  
C33B H33B 0.9500  
C34B C35B 1.37(4)  
C34B H34B 0.9500  
C35B C36B 1.35(4)  
C35B H35B 0.9500  
C39B C44B 1.388(5)  
C39B C40B 1.389(4)  
C39B P3B 1.83(2)  
C40B C41B 1.389(4)  
C40B H40B 0.9500  
C41B C42B 1.389(4)  
C41B H41B 0.9500  
C42B C43B 1.389(4)

C42B H42B 0.9500  
C43B C44B 1.389(4)  
C43B H43B 0.9500  
C44B H44B 0.9500  
C45B C50B 1.388(5)  
C45B C46B 1.388(4)  
C45B P3B 1.832(18)  
C46B C47B 1.388(4)  
C46B H46B 0.9500  
C47B C48B 1.389(4)  
C47B H47B 0.9500  
C48B C49B 1.389(4)  
C48B H48B 0.9500  
C49B C50B 1.390(4)  
C49B H49B 0.9500  
C50B H50B 0.9500  
C51B C56B 1.388(5)  
C51B C52B 1.388(4)  
C51B P4B 1.81(2)  
C52B C53B 1.389(4)  
C52B H52B 0.9500  
C53B C54B 1.388(4)  
C53B H53B 0.9500  
C54B C55B 1.389(4)  
C54B H54B 0.9500  
C55B C56B 1.388(4)  
C55B H55B 0.9500  
C56B H56B 0.9500  
C57B C62B 1.388(5)  
C57B C58B 1.389(4)  
C57B P4B 1.82(2)  
C58B C59B 1.389(4)  
C58B H58B 0.9500  
C59B C60B 1.389(4)  
C59B H59B 0.9500  
C60B C61B 1.389(4)  
C60B H60B 0.9500  
C61B C62B 1.389(4)  
C61B H61B 0.9500

C62B H62B 0.9500  
N1B C5B 1.28(3)  
N2B C36B 1.30(3)  
N2B C32B 1.33(3)  
P1A C6A 1.78(3)  
P1A C8A 1.825(15)  
P2A C7A 1.85(3)  
P3A C45A 1.82(3)  
C5A C7A 1.46(4)  
C6A H6AA 0.9900  
C6A H6AB 0.9900  
C7A H7AA 0.9900  
C7A H7AB 0.9900  
C8A C9A 1.3900  
C8A C13A 1.3900  
C9A C10A 1.3900  
C9A H9A 0.9500  
C10A C11A 1.3900  
C10A H10A 0.9500  
C11A C12A 1.3900  
C11A H11A 0.9500  
C12A C13A 1.3900  
C12A H12A 0.9500  
C13A H13A 0.9500  
P1B C6B 1.89(3)  
P2B C20B 1.77(2)  
P2B C26B 1.81(2)  
P2B C7B 1.85(3)  
P3B C37B 1.82(3)  
P4B C38B 1.84(3)  
C5B C7B 1.50(4)  
C6B H6BA 0.9900  
C6B H6BB 0.9900  
C7B H7BA 0.9900  
C7B H7BB 0.9900  
C32B C37B 1.52(3)  
C36B C38B 1.47(4)  
C37B H37C 0.9900  
C37B H37D 0.9900

C38B H38C 0.9900  
C38B H38D 0.9900  
C20B C21B 1.3900  
C20B C25B 1.3900  
C21B C22B 1.3900  
C21B H21B 0.9500  
C22B C23B 1.3900  
C22B H22B 0.9500  
C23B C24B 1.3900  
C23B H23B 0.9500  
C24B C25B 1.3900  
C24B H24B 0.9500  
C25B H25B 0.9500  
C26B C27B 1.3900  
C26B C31B 1.3900  
C27B C28B 1.3900  
C27B H27B 0.9500  
C28B C29B 1.3900  
C28B H28B 0.9500  
C29B C30B 1.3900  
C29B H29B 0.9500  
C30B C31B 1.3900  
C30B H30B 0.9500  
C31B H31B 0.9500  
Sb1C F1C 1.836(16)  
Sb1C F4C 1.869(18)  
Sb1C F3C 1.869(18)  
Sb1C F6C 1.875(14)  
Sb1C F5C 1.880(16)  
Sb1C F2C 1.895(17)  
Sb1D F6D 1.828(19)  
Sb1D F2D 1.85(2)  
Sb1D F3D 1.865(19)  
Sb1D F1D 1.873(18)  
Sb1D F4D 1.893(18)  
Sb1D F5D 1.921(19)  
Sb1E F4E 1.82(4)  
Sb1E F2E 1.82(4)  
Sb1E F1E 1.84(3)

Sb1E F3E 1.85(4)  
 Sb1E F5E 1.86(4)  
 Sb1E F6E 2.01(5)  
 Sb2E F5E' 1.80(3)  
 Sb2E F6E' 1.82(5)  
 Sb2E F1E' 1.83(3)  
 Sb2E F2E' 1.85(4)  
 Sb2E F3E' 1.86(4)  
 Sb2E F4E' 1.93(3)  
 Sb1F F2F 1.840(17)  
 Sb1F F4F 1.857(16)  
 Sb1F F1F 1.858(14)  
 Sb1F F6F 1.860(16)  
 Sb1F F5F 1.869(16)  
 Sb1F F3F 1.889(16)  
 Sb2F F2F' 1.836(18)  
 Sb2F F4F' 1.856(18)  
 Sb2F F1F' 1.858(16)  
 Sb2F F6F' 1.862(17)  
 Sb2F F5F' 1.872(17)  
 Sb2F F3F' 1.893(18)

Angles-----

P1A Au1A C11A 173.4(3)  
 P1A Au1A Au2A 86.0(2)  
 C11A Au1A Au2A 99.60(19)  
 N1A Au2A P3A 167.8(6)  
 N1A Au2A Au3A 79.0(6)  
 P3A Au2A Au3A 89.8(2)  
 N1A Au2A Au1A 84.0(6)  
 P3A Au2A Au1A 106.9(2)  
 Au3A Au2A Au1A 162.86(6)  
 N2A Au3A P2A 167.5(7)  
 N2A Au3A Au2A 78.9(6)  
 P2A Au3A Au2A 88.6(3)  
 N2A Au3A Au4A 86.2(6)  
 P2A Au3A Au4A 106.2(3)  
 Au2A Au3A Au4A 160.88(5)  
 P4A Au4A C12A 176.5(4)

P4A Au4A Au3A 88.0(2)  
C12A Au4A Au3A 92.8(3)  
N1A C1A C2A 123(3)  
N1A C1A C6A 124(2)  
C2A C1A C6A 113(2)  
C1A C2A C3A 116(3)  
C1A C2A H2A 121.9  
C3A C2A H2A 121.9  
C4A C3A C2A 122(3)  
C4A C3A H3A 119.2  
C2A C3A H3A 119.2  
C5A C4A C3A 118(3)  
C5A C4A H4A 121.1  
C3A C4A H4A 121.1  
C19A C14A C15A 118.9(14)  
C19A C14A P1A 118.8(13)  
C15A C14A P1A 122.0(13)  
C16A C15A C14A 120.9(15)  
C16A C15A H15A 119.6  
C14A C15A H15A 119.6  
C15A C16A C17A 120.2(16)  
C15A C16A H16A 119.9  
C17A C16A H16A 119.9  
C18A C17A C16A 118.6(15)  
C18A C17A H17A 120.7  
C16A C17A H17A 120.7  
C19A C18A C17A 121.2(15)  
C19A C18A H18A 119.4  
C17A C18A H18A 119.4  
C14A C19A C18A 119.9(15)  
C14A C19A H19A 120.1  
C18A C19A H19A 120.1  
C25A C20A C21A 119.0(17)  
C25A C20A P2A 118.4(18)  
C21A C20A P2A 120.4(19)  
C20A C21A C22A 120.7(17)  
C20A C21A H21A 119.6  
C22A C21A H21A 119.6  
C23A C22A C21A 117.1(17)

C23A C22A H22A 121.5  
C21A C22A H22A 121.5  
C24A C23A C22A 116.6(18)  
C24A C23A H23A 121.7  
C22A C23A H23A 121.7  
C23A C24A C25A 119.5(17)  
C23A C24A H24A 120.2  
C25A C24A H24A 120.2  
C20A C25A C24A 117.8(16)  
C20A C25A H25A 121.1  
C24A C25A H25A 121.1  
C25' C20' C21' 119.8(18)  
C25' C20' P2A 122(3)  
C21' C20' P2A 118(3)  
C20' C21' C22' 119.2(18)  
C20' C21' H21' 120.4  
C22' C21' H21' 120.4  
C21' C22' C23' 117(2)  
C21' C22' H22' 121.4  
C23' C22' H22' 121.4  
C24' C23' C22' 117(2)  
C24' C23' H23' 121.3  
C22' C23' H23' 121.3  
C23' C24' C25' 117(2)  
C23' C24' H24' 121.5  
C25' C24' H24' 121.5  
C20' C25' C24' 119.7(18)  
C20' C25' H25' 120.1  
C24' C25' H25' 120.1  
C27A C26A C31A 120.0  
C27A C26A P2A 118.2(18)  
C31A C26A P2A 121.6(17)  
C26A C27A C28A 120.0  
C26A C27A H27A 120.0  
C28A C27A H27A 120.0  
C29A C28A C27A 120.0  
C29A C28A H28A 120.0  
C27A C28A H28A 120.0  
C28A C29A C30A 120.0



|      |      |      |           |
|------|------|------|-----------|
| C28A | C29A | H29A | 120.0     |
| C30A | C29A | H29A | 120.0     |
| C29A | C30A | C31A | 120.0     |
| C29A | C30A | H30A | 120.0     |
| C31A | C30A | H30A | 120.0     |
| C30A | C31A | C26A | 120.0     |
| C30A | C31A | H31A | 120.0     |
| C26A | C31A | H31A | 120.0     |
| C32A | N2A  | C36A | 123(2)    |
| C32A | N2A  | Au3A | 119.1(17) |
| C36A | N2A  | Au3A | 118.0(19) |
| N2A  | C32A | C33A | 124(2)    |
| N2A  | C32A | C37A | 120(2)    |
| C33A | C32A | C37A | 115(2)    |
| C34A | C33A | C32A | 114(3)    |
| C34A | C33A | H33A | 123.1     |
| C32A | C33A | H33A | 123.1     |
| C35A | C34A | C33A | 125(3)    |
| C35A | C34A | H34A | 117.5     |
| C33A | C34A | H34A | 117.5     |
| C34A | C35A | C36A | 118(3)    |
| C34A | C35A | H35A | 121.2     |
| C36A | C35A | H35A | 121.2     |
| N2A  | C36A | C38A | 122(3)    |
| N2A  | C36A | C35A | 117(3)    |
| C38A | C36A | C35A | 121(3)    |
| C32A | C37A | P3A  | 114(2)    |
| C32A | C37A | H37A | 108.7     |
| P3A  | C37A | H37A | 108.7     |
| C32A | C37A | H37B | 108.7     |
| P3A  | C37A | H37B | 108.7     |
| H37A | C37A | H37B | 107.6     |
| C36A | C38A | P4A  | 112(2)    |
| C36A | C38A | H38A | 109.2     |
| P4A  | C38A | H38A | 109.2     |
| C36A | C38A | H38B | 109.2     |
| P4A  | C38A | H38B | 109.2     |
| H38A | C38A | H38B | 107.9     |
| C44A | C39A | C40A | 120.2(15) |

C44A C39A P3A 122.5(14)  
C40A C39A P3A 117.3(15)  
C41A C40A C39A 119.8(16)  
C41A C40A H40A 120.1  
C39A C40A H40A 120.1  
C40A C41A C42A 120.2(16)  
C40A C41A H41A 119.9  
C42A C41A H41A 119.9  
C43A C42A C41A 119.6(15)  
C43A C42A H42A 120.2  
C41A C42A H42A 120.2  
C42A C43A C44A 120.5(15)  
C42A C43A H43A 119.8  
C44A C43A H43A 119.8  
C39A C44A C43A 119.5(15)  
C39A C44A H44A 120.2  
C43A C44A H44A 120.2  
C45A C46A C47A 115(2)  
C45A C46A H46A 122.3  
C47A C46A H46A 122.3  
C48A C47A C46A 120(2)  
C48A C47A H47A 120.0  
C46A C47A H47A 120.0  
C49A C48A C47A 122(3)  
C49A C48A H48A 119.0  
C47A C48A H48A 119.0  
C48A C49A C50A 122(2)  
C48A C49A H49A 119.2  
C50A C49A H49A 119.2  
C49A C50A C45A 119(2)  
C49A C50A H50A 120.6  
C45A C50A H50A 120.6  
C52A C51A C56A 120.0  
C52A C51A P4A 122.0(15)  
C56A C51A P4A 118.0(15)  
C51A C52A C53A 120.0  
C51A C52A H52A 120.0  
C53A C52A H52A 120.0  
C54A C53A C52A 120.0

|      |      |      |           |
|------|------|------|-----------|
| C54A | C53A | H53A | 120.0     |
| C52A | C53A | H53A | 120.0     |
| C53A | C54A | C55A | 120.0     |
| C53A | C54A | H54A | 120.0     |
| C55A | C54A | H54A | 120.0     |
| C56A | C55A | C54A | 120.0     |
| C56A | C55A | H55A | 120.0     |
| C54A | C55A | H55A | 120.0     |
| C55A | C56A | C51A | 120.0     |
| C55A | C56A | H56A | 120.0     |
| C51A | C56A | H56A | 120.0     |
| C58A | C57A | C63A | 120.0     |
| C58A | C57A | P4A  | 121.8(15) |
| C63A | C57A | P4A  | 118.0(15) |
| C59A | C58A | C57A | 120.0     |
| C59A | C58A | H58A | 120.0     |
| C57A | C58A | H58A | 120.0     |
| C60A | C59A | C58A | 120.0     |
| C60A | C59A | H59A | 120.0     |
| C58A | C59A | H59A | 120.0     |
| C59A | C60A | C62A | 120.0     |
| C59A | C60A | H60A | 120.0     |
| C62A | C60A | H60A | 120.0     |
| C63A | C62A | C60A | 120.0     |
| C63A | C62A | H62A | 120.0     |
| C60A | C62A | H62A | 120.0     |
| C62A | C63A | C57A | 120.0     |
| C62A | C63A | H63A | 120.0     |
| C57A | C63A | H63A | 120.0     |
| C1A  | N1A  | C5A  | 124(2)    |
| C1A  | N1A  | Au2A | 117.0(18) |
| C5A  | N1A  | Au2A | 118.4(15) |
| P1B  | Au1B | Cl1B | 174.3(3)  |
| P1B  | Au1B | Au2B | 88.2(2)   |
| Cl1B | Au1B | Au2B | 97.07(19) |
| N1B  | Au2B | P3B  | 166.5(7)  |
| N1B  | Au2B | Au3B | 77.8(6)   |
| P3B  | Au2B | Au3B | 89.4(2)   |
| N1B  | Au2B | Au1B | 83.1(6)   |

P3B Au2B Au1B 109.6(2)  
Au3B Au2B Au1B 160.97(6)  
N2B Au3B P2B 167.2(6)  
N2B Au3B Au4B 84.2(5)  
P2B Au3B Au4B 108.4(3)  
N2B Au3B Au2B 78.3(5)  
P2B Au3B Au2B 88.9(3)  
Au4B Au3B Au2B 158.63(5)  
P4B Au4B Cl2B 176.9(3)  
P4B Au4B Au3B 88.6(2)  
Cl2B Au4B Au3B 90.8(2)  
C5B C4B C3B 121(3)  
C5B C4B H4B 119.3  
C3B C4B H4B 119.3  
C2B C3B C4B 115(3)  
C2B C3B H3B 122.3  
C4B C3B H3B 122.3  
C3B C2B C1B 127(3)  
C3B C2B H2B 116.7  
C1B C2B H2B 116.7  
C2B C1B N1B 118(3)  
C2B C1B C6B 131(3)  
N1B C1B C6B 111(2)  
C13B C8B C9B 120.5(15)  
C13B C8B P1B 120.3(13)  
C9B C8B P1B 119.2(13)  
C10B C9B C8B 119.0(15)  
C10B C9B H9B 120.5  
C8B C9B H9B 120.5  
C11B C10B C9B 119.1(15)  
C11B C10B H10B 120.4  
C9B C10B H10B 120.4  
C12B C11B C10B 123.0(15)  
C12B C11B H11B 118.5  
C10B C11B H11B 118.5  
C11B C12B C13B 116.6(14)  
C11B C12B H12B 121.7  
C13B C12B H12B 121.7  
C8B C13B C12B 121.5(14)

C8B C13B H13B 119.2  
 C12B C13B H13B 119.2  
 C19B C14B C15B 120.0  
 C19B C14B P1B 120.1(11)  
 C15B C14B P1B 119.8(11)  
 C14B C19B C18B 120.0  
 C14B C19B H19B 120.0  
 C18B C19B H19B 120.0  
 C17B C18B C19B 120.0  
 C17B C18B H18B 120.0  
 C19B C18B H18B 120.0  
 C16B C17B C18B 120.0  
 C16B C17B H17B 120.0  
 C18B C17B H17B 120.0  
 C17B C16B C15B 120.0  
 C17B C16B H16B 120.0  
 C15B C16B H16B 120.0  
 C16B C15B C14B 120.0  
 C16B C15B H15B 120.0  
 C14B C15B H15B 120.0  
 C32B C33B C34B 116(3)  
 C32B C33B H33B 122.2  
 C34B C33B H33B 122.2  
 C35B C34B C33B 118(3)  
 C35B C34B H34B 121.0  
 C33B C34B H34B 121.0  
 C36B C35B C34B 122(3)  
 C36B C35B H35B 119.1  
 C34B C35B H35B 119.1  
 C44B C39B C40B 119.2(15)  
 C44B C39B P3B 122.0(15)  
 C40B C39B P3B 118.0(15)  
 C39B C40B C41B 119.5(16)  
 C39B C40B H40B 120.2  
 C41B C40B H40B 120.2  
 C42B C41B C40B 119.5(17)  
 C42B C41B H41B 120.2  
 C40B C41B H41B 120.2  
 C43B C42B C41B 119.0(16)

C43B C42B H42B 120.5  
C41B C42B H42B 120.5  
C44B C43B C42B 119.8(15)  
C44B C43B H43B 120.1  
C42B C43B H43B 120.1  
C39B C44B C43B 120.0(15)  
C39B C44B H44B 120.0  
C43B C44B H44B 120.0  
C50B C45B C46B 120.3(14)  
C50B C45B P3B 118.6(13)  
C46B C45B P3B 121.1(13)  
C45B C46B C47B 120.4(15)  
C45B C46B H46B 119.8  
C47B C46B H46B 119.8  
C46B C47B C48B 118.5(16)  
C46B C47B H47B 120.7  
C48B C47B H47B 120.7  
C47B C48B C49B 122.0(16)  
C47B C48B H48B 119.0  
C49B C48B H48B 119.0  
C48B C49B C50B 118.6(15)  
C48B C49B H49B 120.7  
C50B C49B H49B 120.7  
C45B C50B C49B 120.2(14)  
C45B C50B H50B 119.9  
C49B C50B H50B 119.9  
C56B C51B C52B 121.3(16)  
C56B C51B P4B 115.7(16)  
C52B C51B P4B 123.0(16)  
C51B C52B C53B 118.7(16)  
C51B C52B H52B 120.6  
C53B C52B H52B 120.6  
C54B C53B C52B 119.8(16)  
C54B C53B H53B 120.1  
C52B C53B H53B 120.1  
C53B C54B C55B 120.8(16)  
C53B C54B H54B 119.6  
C55B C54B H54B 119.6  
C56B C55B C54B 118.9(16)

C56B C55B H55B 120.6  
C54B C55B H55B 120.6  
C55B C56B C51B 118.7(16)  
C55B C56B H56B 120.7  
C51B C56B H56B 120.7  
C62B C57B C58B 118.3(15)  
C62B C57B P4B 118.2(14)  
C58B C57B P4B 123.6(14)  
C59B C58B C57B 120.4(15)  
C59B C58B H58B 119.8  
C57B C58B H58B 119.8  
C60B C59B C58B 120.3(16)  
C60B C59B H59B 119.9  
C58B C59B H59B 119.9  
C59B C60B C61B 119.7(16)  
C59B C60B H60B 120.1  
C61B C60B H60B 120.1  
C62B C61B C60B 118.6(15)  
C62B C61B H61B 120.7  
C60B C61B H61B 120.7  
C57B C62B C61B 121.9(15)  
C57B C62B H62B 119.0  
C61B C62B H62B 119.0  
C5B N1B C1B 118(2)  
C5B N1B Au2B 121.0(17)  
C1B N1B Au2B 120.0(17)  
C36B N2B C32B 122(2)  
C36B N2B Au3B 120.2(17)  
C32B N2B Au3B 118.2(16)  
C6A P1A C14A 104.3(12)  
C6A P1A C8A 100.2(10)  
C14A P1A C8A 105.9(9)  
C6A P1A Au1A 118.4(8)  
C14A P1A Au1A 111.0(7)  
C8A P1A Au1A 115.5(7)  
C20A P2A C26A 106.4(18)  
C20A P2A C7A 108.7(14)  
C26A P2A C7A 106.0(14)  
C26A P2A C20' 106.4(17)

C7A P2A C20' 99(2)  
C20A P2A Au3A 110.1(12)  
C26A P2A Au3A 117.1(11)  
C7A P2A Au3A 108.2(10)  
C20' P2A Au3A 118(2)  
C39A P3A C45A 106.3(12)  
C39A P3A C37A 107.7(10)  
C45A P3A C37A 102.4(12)  
C39A P3A Au2A 116.9(8)  
C45A P3A Au2A 114.3(9)  
C37A P3A Au2A 108.1(9)  
C57A P4A C51A 110.1(12)  
C57A P4A C38A 101.3(13)  
C51A P4A C38A 106.1(13)  
C57A P4A Au4A 113.7(9)  
C51A P4A Au4A 111.7(9)  
C38A P4A Au4A 113.1(9)  
C4A C5A N1A 117(2)  
C4A C5A C7A 125(3)  
N1A C5A C7A 118(2)  
C1A C6A P1A 109.2(17)  
C1A C6A H6AA 109.9  
P1A C6A H6AA 109.9  
C1A C6A H6AB 109.9  
P1A C6A H6AB 109.9  
H6AA C6A H6AB 108.3  
C5A C7A P2A 112(2)  
C5A C7A H7AA 109.2  
P2A C7A H7AA 109.2  
C5A C7A H7AB 109.2  
P2A C7A H7AB 109.2  
H7AA C7A H7AB 107.9  
C9A C8A C13A 120.0  
C9A C8A P1A 123.4(11)  
C13A C8A P1A 116.4(11)  
C8A C9A C10A 120.0  
C8A C9A H9A 120.0  
C10A C9A H9A 120.0  
C11A C10A C9A 120.0



C11A C10A H10A 120.0  
C9A C10A H10A 120.0  
C10A C11A C12A 120.0  
C10A C11A H11A 120.0  
C12A C11A H11A 120.0  
C11A C12A C13A 120.0  
C11A C12A H12A 120.0  
C13A C12A H12A 120.0  
C12A C13A C8A 120.0  
C12A C13A H13A 120.0  
C8A C13A H13A 120.0  
C46A C45A C50A 122(2)  
C46A C45A P3A 119.1(19)  
C50A C45A P3A 117.7(19)  
C8B P1B C14B 107.8(10)  
C8B P1B C6B 107.5(14)  
C14B P1B C6B 107.4(12)  
C8B P1B Au1B 108.5(8)  
C14B P1B Au1B 115.9(8)  
C6B P1B Au1B 109.4(10)  
C20B P2B C26B 106.9(16)  
C20B P2B C7B 97.8(15)  
C26B P2B C7B 104.9(15)  
C20B P2B Au3B 123.4(12)  
C26B P2B Au3B 114.2(12)  
C7B P2B Au3B 107.0(10)  
C37B P3B C39B 105.7(12)  
C37B P3B C45B 101.0(12)  
C39B P3B C45B 109.0(12)  
C37B P3B Au2B 109.1(9)  
C39B P3B Au2B 115.9(8)  
C45B P3B Au2B 114.7(7)  
C51B P4B C57B 108.5(14)  
C51B P4B C38B 104.8(13)  
C57B P4B C38B 102.1(13)  
C51B P4B Au4B 113.0(9)  
C57B P4B Au4B 115.5(7)  
C38B P4B Au4B 111.9(9)  
N1B C5B C4B 120(3)

N1B C5B C7B 122(2)  
 C4B C5B C7B 118(3)  
 C1B C6B P1B 116(2)  
 C1B C6B H6BA 108.4  
 P1B C6B H6BA 108.4  
 C1B C6B H6BB 108.4  
 P1B C6B H6BB 108.4  
 H6BA C6B H6BB 107.4  
 C5B C7B P2B 110(2)  
 C5B C7B H7BA 109.6  
 P2B C7B H7BA 109.6  
 C5B C7B H7BB 109.6  
 P2B C7B H7BB 109.6  
 H7BA C7B H7BB 108.1  
 N2B C32B C33B 123(2)  
 N2B C32B C37B 119(2)  
 C33B C32B C37B 118(2)  
 N2B C36B C35B 120(3)  
 N2B C36B C38B 121(2)  
 C35B C36B C38B 119(3)  
 C32B C37B P3B 112(2)  
 C32B C37B H37C 109.2  
 P3B C37B H37C 109.2  
 C32B C37B H37D 109.2  
 P3B C37B H37D 109.2  
 H37C C37B H37D 107.9  
 C36B C38B P4B 114(2)  
 C36B C38B H38C 108.7  
 P4B C38B H38C 108.7  
 C36B C38B H38D 108.7  
 P4B C38B H38D 108.7  
 H38C C38B H38D 107.6  
 C21B C20B C25B 120.0  
 C21B C20B P2B 119(2)  
 C25B C20B P2B 121(2)  
 C22B C21B C20B 120.0  
 C22B C21B H21B 120.0  
 C20B C21B H21B 120.0  
 C21B C22B C23B 120.0

|      |      |      |          |
|------|------|------|----------|
| C21B | C22B | H22B | 120.0    |
| C23B | C22B | H22B | 120.0    |
| C24B | C23B | C22B | 120.0    |
| C24B | C23B | H23B | 120.0    |
| C22B | C23B | H23B | 120.0    |
| C23B | C24B | C25B | 120.0    |
| C23B | C24B | H24B | 120.0    |
| C25B | C24B | H24B | 120.0    |
| C24B | C25B | C20B | 120.0    |
| C24B | C25B | H25B | 120.0    |
| C20B | C25B | H25B | 120.0    |
| C27B | C26B | C31B | 120.0    |
| C27B | C26B | P2B  | 120(2)   |
| C31B | C26B | P2B  | 119(2)   |
| C26B | C27B | C28B | 120.0    |
| C26B | C27B | H27B | 120.0    |
| C28B | C27B | H27B | 120.0    |
| C29B | C28B | C27B | 120.0    |
| C29B | C28B | H28B | 120.0    |
| C27B | C28B | H28B | 120.0    |
| C28B | C29B | C30B | 120.0    |
| C28B | C29B | H29B | 120.0    |
| C30B | C29B | H29B | 120.0    |
| C31B | C30B | C29B | 120.0    |
| C31B | C30B | H30B | 120.0    |
| C29B | C30B | H30B | 120.0    |
| C30B | C31B | C26B | 120.0    |
| C30B | C31B | H31B | 120.0    |
| C26B | C31B | H31B | 120.0    |
| F1C  | Sb1C | F4C  | 90.6(8)  |
| F1C  | Sb1C | F3C  | 86.7(8)  |
| F4C  | Sb1C | F3C  | 89.1(8)  |
| F1C  | Sb1C | F6C  | 179.7(8) |
| F4C  | Sb1C | F6C  | 89.1(8)  |
| F3C  | Sb1C | F6C  | 93.2(7)  |
| F1C  | Sb1C | F5C  | 88.9(8)  |
| F4C  | Sb1C | F5C  | 90.1(8)  |
| F3C  | Sb1C | F5C  | 175.5(8) |
| F6C  | Sb1C | F5C  | 91.2(7)  |

|      |      |      |           |
|------|------|------|-----------|
| F1C  | Sb1C | F2C  | 89.8(8)   |
| F4C  | Sb1C | F2C  | 178.9(9)  |
| F3C  | Sb1C | F2C  | 89.9(8)   |
| F6C  | Sb1C | F2C  | 90.5(7)   |
| F5C  | Sb1C | F2C  | 90.9(8)   |
| F6D  | Sb1D | F2D  | 93.2(11)  |
| F6D  | Sb1D | F3D  | 88.6(9)   |
| F2D  | Sb1D | F3D  | 92.0(9)   |
| F6D  | Sb1D | F1D  | 177.3(9)  |
| F2D  | Sb1D | F1D  | 88.7(9)   |
| F3D  | Sb1D | F1D  | 93.2(9)   |
| F6D  | Sb1D | F4D  | 89.3(9)   |
| F2D  | Sb1D | F4D  | 177.3(9)  |
| F3D  | Sb1D | F4D  | 89.0(8)   |
| F1D  | Sb1D | F4D  | 88.7(8)   |
| F6D  | Sb1D | F5D  | 90.9(9)   |
| F2D  | Sb1D | F5D  | 91.9(10)  |
| F3D  | Sb1D | F5D  | 176.1(9)  |
| F1D  | Sb1D | F5D  | 87.2(8)   |
| F4D  | Sb1D | F5D  | 87.1(8)   |
| F4E  | Sb1E | F2E  | 172(2)    |
| F4E  | Sb1E | F1E  | 87.2(17)  |
| F2E  | Sb1E | F1E  | 89.2(16)  |
| F4E  | Sb1E | F3E  | 86.5(17)  |
| F2E  | Sb1E | F3E  | 86.7(17)  |
| F1E  | Sb1E | F3E  | 93.3(17)  |
| F4E  | Sb1E | F5E  | 94.0(18)  |
| F2E  | Sb1E | F5E  | 92.9(18)  |
| F1E  | Sb1E | F5E  | 88.1(17)  |
| F3E  | Sb1E | F5E  | 178.5(17) |
| F4E  | Sb1E | F6E  | 93(2)     |
| F2E  | Sb1E | F6E  | 91(2)     |
| F1E  | Sb1E | F6E  | 174(2)    |
| F3E  | Sb1E | F6E  | 93(2)     |
| F5E  | Sb1E | F6E  | 86(2)     |
| F5E' | Sb2E | F6E' | 95(2)     |
| F5E' | Sb2E | F1E' | 90.9(14)  |
| F6E' | Sb2E | F1E' | 172(2)    |
| F5E' | Sb2E | F2E' | 91.1(17)  |

F6E' Sb2E F2E' 87(2)  
F1E' Sb2E F2E' 88.2(14)  
F5E' Sb2E F3E' 175.9(18)  
F6E' Sb2E F3E' 86(2)  
F1E' Sb2E F3E' 88.2(16)  
F2E' Sb2E F3E' 84.9(19)  
F5E' Sb2E F4E' 90.9(16)  
F6E' Sb2E F4E' 94(2)  
F1E' Sb2E F4E' 91.2(13)  
F2E' Sb2E F4E' 177.9(17)  
F3E' Sb2E F4E' 93.1(17)  
F2F Sb1F F4F 177.9(16)  
F2F Sb1F F1F 92.5(14)  
F4F Sb1F F1F 86.7(13)  
F2F Sb1F F6F 91.3(13)  
F4F Sb1F F6F 89.5(13)  
F1F Sb1F F6F 176.1(14)  
F2F Sb1F F5F 89.5(14)  
F4F Sb1F F5F 92.5(15)  
F1F Sb1F F5F 92.1(12)  
F6F Sb1F F5F 88.7(12)  
F2F Sb1F F3F 85.5(14)  
F4F Sb1F F3F 92.6(14)  
F1F Sb1F F3F 87.8(12)  
F6F Sb1F F3F 91.7(12)  
F5F Sb1F F3F 174.9(15)  
F2F' Sb2F F4F' 178.7(14)  
F2F' Sb2F F1F' 94.1(14)  
F4F' Sb2F F1F' 87.2(12)  
F2F' Sb2F F6F' 91.6(14)  
F4F' Sb2F F6F' 87.1(13)  
F1F' Sb2F F6F' 174.1(14)  
F2F' Sb2F F5F' 88.9(14)  
F4F' Sb2F F5F' 91.0(14)  
F1F' Sb2F F5F' 91.8(12)  
F6F' Sb2F F5F' 89.8(13)  
F2F' Sb2F F3F' 85.7(14)  
F4F' Sb2F F3F' 94.4(12)  
F1F' Sb2F F3F' 86.9(12)

F6F' Sb2F F3F' 91.9(13)

F5F' Sb2F F3F' 174.4(15)

-----  
**Table 3.** Torsion angles [°] for **Complex 3.**

---

|      |      |      |      |         |
|------|------|------|------|---------|
| N1A  | C1A  | C2A  | C3A  | 1(5)    |
| C6A  | C1A  | C2A  | C3A  | -178(3) |
| C1A  | C2A  | C3A  | C4A  | -5(5)   |
| C2A  | C3A  | C4A  | C5A  | 6(5)    |
| C19A | C14A | C15A | C16A | 5(5)    |
| P1A  | C14A | C15A | C16A | 179(2)  |
| C14A | C15A | C16A | C17A | -1(5)   |
| C15A | C16A | C17A | C18A | -3(5)   |
| C16A | C17A | C18A | C19A | 3(5)    |
| C15A | C14A | C19A | C18A | -5(4)   |
| P1A  | C14A | C19A | C18A | -179(2) |
| C17A | C18A | C19A | C14A | 1(5)    |
| C25A | C20A | C21A | C22A | 14(7)   |
| P2A  | C20A | C21A | C22A | 177(3)  |
| C20A | C21A | C22A | C23A | 6(6)    |
| C21A | C22A | C23A | C24A | -30(5)  |
| C22A | C23A | C24A | C25A | 34(5)   |
| C21A | C20A | C25A | C24A | -10(6)  |
| P2A  | C20A | C25A | C24A | -174(3) |
| C23A | C24A | C25A | C20A | -13(6)  |
| C25' | C20' | C21' | C22' | -4(11)  |
| P2A  | C20' | C21' | C22' | 172(5)  |
| C20' | C21' | C22' | C23' | -16(10) |
| C21' | C22' | C23' | C24' | 35(8)   |
| C22' | C23' | C24' | C25' | -34(8)  |
| C21' | C20' | C25' | C24' | 5(12)   |
| P2A  | C20' | C25' | C24' | -170(6) |
| C23' | C24' | C25' | C20' | 13(10)  |
| C31A | C26A | C27A | C28A | 0.0     |
| P2A  | C26A | C27A | C28A | -175(2) |
| C26A | C27A | C28A | C29A | 0.0     |
| C27A | C28A | C29A | C30A | 0.0     |

C28A C29A C30A C31A 0.0  
 C29A C30A C31A C26A 0.0  
 C27A C26A C31A C30A 0.0  
 P2A C26A C31A C30A 175(2)  
 C36A N2A C32A C33A -6(5)  
 Au3A N2A C32A C33A 178(2)  
 C36A N2A C32A C37A -172(3)  
 Au3A N2A C32A C37A 12(4)  
 N2A C32A C33A C34A 7(5)  
 C37A C32A C33A C34A 174(3)  
 C32A C33A C34A C35A -7(5)  
 C33A C34A C35A C36A 5(4)  
 C32A N2A C36A C38A 174(3)  
 Au3A N2A C36A C38A -10(4)  
 C32A N2A C36A C35A 3(4)  
 Au3A N2A C36A C35A 179.2(19)  
 C34A C35A C36A N2A -2(4)  
 C34A C35A C36A C38A -174(3)  
 N2A C32A C37A P3A 76(3)  
 C33A C32A C37A P3A -91(3)  
 N2A C36A C38A P4A 86(3)  
 C35A C36A C38A P4A -103(3)  
 C44A C39A C40A C41A -6(5)  
 P3A C39A C40A C41A 176(3)  
 C39A C40A C41A C42A 3(6)  
 C40A C41A C42A C43A 1(5)  
 C41A C42A C43A C44A -1(5)  
 C40A C39A C44A C43A 6(4)  
 P3A C39A C44A C43A -176(2)  
 C42A C43A C44A C39A -2(4)  
 C45A C46A C47A C48A 7(4)  
 C46A C47A C48A C49A -4(4)  
 C47A C48A C49A C50A 1(4)  
 C48A C49A C50A C45A -3(4)  
 C56A C51A C52A C53A 0.0  
 P4A C51A C52A C53A 177.7(17)  
 C51A C52A C53A C54A 0.0  
 C52A C53A C54A C55A 0.0  
 C53A C54A C55A C56A 0.0

C54A C55A C56A C51A 0.0  
 C52A C51A C56A C55A 0.0  
 P4A C51A C56A C55A -177.8(17)  
 C63A C57A C58A C59A 0.0  
 P4A C57A C58A C59A 174.5(18)  
 C57A C58A C59A C60A 0.0  
 C58A C59A C60A C62A 0.0  
 C59A C60A C62A C63A 0.0  
 C60A C62A C63A C57A 0.0  
 C58A C57A C63A C62A 0.0  
 P4A C57A C63A C62A -174.7(17)  
 C2A C1A N1A C5A 2(4)  
 C6A C1A N1A C5A -179(2)  
 C2A C1A N1A Au2A -171(2)  
 C6A C1A N1A Au2A 8(3)  
 C5B C4B C3B C2B 5(5)  
 C4B C3B C2B C1B -4(5)  
 C3B C2B C1B N1B 2(5)  
 C3B C2B C1B C6B 178(4)  
 C13B C8B C9B C10B 0(5)  
 P1B C8B C9B C10B -179(2)  
 C8B C9B C10B C11B -2(5)  
 C9B C10B C11B C12B 0(5)  
 C10B C11B C12B C13B 4(5)  
 C9B C8B C13B C12B 4(4)  
 P1B C8B C13B C12B -177(2)  
 C11B C12B C13B C8B -6(4)  
 C15B C14B C19B C18B 0.0  
 P1B C14B C19B C18B 177.6(15)  
 C14B C19B C18B C17B 0.0  
 C19B C18B C17B C16B 0.0  
 C18B C17B C16B C15B 0.0  
 C17B C16B C15B C14B 0.0  
 C19B C14B C15B C16B 0.0  
 P1B C14B C15B C16B -177.6(15)  
 C32B C33B C34B C35B -1(4)  
 C33B C34B C35B C36B -1(4)  
 C44B C39B C40B C41B 5(5)  
 P3B C39B C40B C41B -165(3)



C39B C40B C41B C42B -17(6)  
C40B C41B C42B C43B 16(5)  
C41B C42B C43B C44B -2(5)  
C40B C39B C44B C43B 9(4)  
P3B C39B C44B C43B 179(2)  
C42B C43B C44B C39B -10(4)  
C50B C45B C46B C47B -2(5)  
P3B C45B C46B C47B 177(3)  
C45B C46B C47B C48B 1(5)  
C46B C47B C48B C49B -1(6)  
C47B C48B C49B C50B 2(5)  
C46B C45B C50B C49B 3(4)  
P3B C45B C50B C49B -176(2)  
C48B C49B C50B C45B -3(5)  
C56B C51B C52B C53B 6(5)  
P4B C51B C52B C53B -176(3)  
C51B C52B C53B C54B -1(5)  
C52B C53B C54B C55B 3(6)  
C53B C54B C55B C56B -10(6)  
C54B C55B C56B C51B 16(5)  
C52B C51B C56B C55B -14(5)  
P4B C51B C56B C55B 168(3)  
C62B C57B C58B C59B -3(5)  
P4B C57B C58B C59B 177(2)  
C57B C58B C59B C60B 4(5)  
C58B C59B C60B C61B -8(5)  
C59B C60B C61B C62B 10(5)  
C58B C57B C62B C61B 5(5)  
P4B C57B C62B C61B -175(2)  
C60B C61B C62B C57B -9(5)  
C2B C1B N1B C5B -2(4)  
C6B C1B N1B C5B -178(3)  
C2B C1B N1B Au2B 166(2)  
C6B C1B N1B Au2B -10(3)  
C19A C14A P1A C6A -88(2)  
C15A C14A P1A C6A 99(2)  
C19A C14A P1A C8A 167(2)  
C15A C14A P1A C8A -6(3)  
C19A C14A P1A Au1A 41(2)

|      |      |     |      |            |
|------|------|-----|------|------------|
| C15A | C14A | P1A | Au1A | -132(2)    |
| C25A | C20A | P2A | C26A | -100(4)    |
| C21A | C20A | P2A | C26A | 97(4)      |
| C25A | C20A | P2A | C7A  | 147(3)     |
| C21A | C20A | P2A | C7A  | -16(4)     |
| C25A | C20A | P2A | Au3A | 28(4)      |
| C21A | C20A | P2A | Au3A | -135(3)    |
| C27A | C26A | P2A | C20A | -34.4(19)  |
| C31A | C26A | P2A | C20A | 150.3(17)  |
| C27A | C26A | P2A | C7A  | 81.2(18)   |
| C31A | C26A | P2A | C7A  | -94.2(19)  |
| C27A | C26A | P2A | C20' | -24(3)     |
| C31A | C26A | P2A | C20' | 161(3)     |
| C27A | C26A | P2A | Au3A | -157.9(12) |
| C31A | C26A | P2A | Au3A | 27(2)      |
| C44A | C39A | P3A | C45A | 88(3)      |
| C40A | C39A | P3A | C45A | -94(3)     |
| C44A | C39A | P3A | C37A | -21(3)     |
| C40A | C39A | P3A | C37A | 157(2)     |
| C44A | C39A | P3A | Au2A | -143(2)    |
| C40A | C39A | P3A | Au2A | 35(3)      |
| C32A | C37A | P3A | C39A | -179(2)    |
| C32A | C37A | P3A | C45A | 69(2)      |
| C32A | C37A | P3A | Au2A | -52(2)     |
| C58A | C57A | P4A | C51A | 141.2(14)  |
| C63A | C57A | P4A | C51A | -44.2(16)  |
| C58A | C57A | P4A | C38A | -106.8(15) |
| C63A | C57A | P4A | C38A | 67.8(15)   |
| C58A | C57A | P4A | Au4A | 14.9(16)   |
| C63A | C57A | P4A | Au4A | -170.5(10) |
| C52A | C51A | P4A | C57A | 98.1(16)   |
| C56A | C51A | P4A | C57A | -84.2(15)  |
| C52A | C51A | P4A | C38A | -10.8(17)  |
| C56A | C51A | P4A | C38A | 166.9(14)  |
| C52A | C51A | P4A | Au4A | -134.5(12) |
| C56A | C51A | P4A | Au4A | 43.2(14)   |
| C36A | C38A | P4A | C57A | 71(2)      |
| C36A | C38A | P4A | C51A | -174(2)    |
| C36A | C38A | P4A | Au4A | -51(2)     |

C3A C4A C5A N1A -3(4)  
 C3A C4A C5A C7A 173(3)  
 C1A N1A C5A C4A -1(4)  
 Au2A N1A C5A C4A 172(2)  
 C1A N1A C5A C7A -178(3)  
 Au2A N1A C5A C7A -5(3)  
 N1A C1A C6A P1A 73(3)  
 C2A C1A C6A P1A -108(2)  
 C14A P1A C6A C1A 71.5(18)  
 C8A P1A C6A C1A -179.0(16)  
 Au1A P1A C6A C1A -52.5(19)  
 C4A C5A C7A P2A -91(3)  
 N1A C5A C7A P2A 85(3)  
 C20A P2A C7A C5A -167(2)  
 C26A P2A C7A C5A 79(2)  
 C20' P2A C7A C5A -171(3)  
 Au3A P2A C7A C5A -47(2)  
 C6A P1A C8A C9A -24.3(16)  
 C14A P1A C8A C9A 83.9(15)  
 Au1A P1A C8A C9A -152.8(10)  
 C6A P1A C8A C13A 160.9(13)  
 C14A P1A C8A C13A -90.9(14)  
 Au1A P1A C8A C13A 32.5(13)  
 C13A C8A C9A C10A 0.0  
 P1A C8A C9A C10A -174.6(17)  
 C8A C9A C10A C11A 0.0  
 C9A C10A C11A C12A 0.0  
 C10A C11A C12A C13A 0.0  
 C11A C12A C13A C8A 0.0  
 C9A C8A C13A C12A 0.0  
 P1A C8A C13A C12A 175.0(15)  
 C47A C46A C45A C50A -8(4)  
 C47A C46A C45A P3A -175(2)  
 C49A C50A C45A C46A 6(4)  
 C49A C50A C45A P3A 174(2)  
 C39A P3A C45A C46A -32(2)  
 C37A P3A C45A C46A 80(2)  
 Au2A P3A C45A C46A -162.9(19)  
 C39A P3A C45A C50A 160(2)

C37A P3A C45A C50A -87(2)  
 Au2A P3A C45A C50A 29(2)  
 C13B C8B P1B C14B -173(2)  
 C9B C8B P1B C14B 7(3)  
 C13B C8B P1B C6B 72(3)  
 C9B C8B P1B C6B -109(3)  
 C13B C8B P1B Au1B -46(3)  
 C9B C8B P1B Au1B 133(2)  
 C19B C14B P1B C8B -79.5(15)  
 C15B C14B P1B C8B 98.1(15)  
 C19B C14B P1B C6B 36.1(16)  
 C15B C14B P1B C6B -146.3(15)  
 C19B C14B P1B Au1B 158.7(9)  
 C15B C14B P1B Au1B -23.7(14)  
 C44B C39B P3B C37B 28(3)  
 C40B C39B P3B C37B -162(3)  
 C44B C39B P3B C45B -79(3)  
 C40B C39B P3B C45B 90(3)  
 C44B C39B P3B Au2B 149(2)  
 C40B C39B P3B Au2B -41(3)  
 C50B C45B P3B C37B 96(2)  
 C46B C45B P3B C37B -84(2)  
 C50B C45B P3B C39B -153(2)  
 C46B C45B P3B C39B 27(3)  
 C50B C45B P3B Au2B -21(2)  
 C46B C45B P3B Au2B 159(2)  
 C56B C51B P4B C57B 98(3)  
 C52B C51B P4B C57B -80(3)  
 C56B C51B P4B C38B -154(3)  
 C52B C51B P4B C38B 29(3)  
 C56B C51B P4B Au4B -31(3)  
 C52B C51B P4B Au4B 151(3)  
 C62B C57B P4B C51B -134(2)  
 C58B C57B P4B C51B 46(3)  
 C62B C57B P4B C38B 116(2)  
 C58B C57B P4B C38B -64(3)  
 C62B C57B P4B Au4B -5(3)  
 C58B C57B P4B Au4B 175(2)  
 C1B N1B C5B C4B 3(4)

Au2B N1B C5B C4B -165(2)  
 C1B N1B C5B C7B -179(3)  
 Au2B N1B C5B C7B 13(4)  
 C3B C4B C5B N1B -5(5)  
 C3B C4B C5B C7B 177(3)  
 C2B C1B C6B P1B 104(4)  
 N1B C1B C6B P1B -81(3)  
 C8B P1B C6B C1B -55(3)  
 C14B P1B C6B C1B -171(2)  
 Au1B P1B C6B C1B 63(2)  
 N1B C5B C7B P2B -89(3)  
 C4B C5B C7B P2B 90(3)  
 C20B P2B C7B C5B -90(2)  
 C26B P2B C7B C5B 160(2)  
 Au3B P2B C7B C5B 38(2)  
 C36B N2B C32B C33B -3(4)  
 Au3B N2B C32B C33B 178(2)  
 C36B N2B C32B C37B 171(3)  
 Au3B N2B C32B C37B -8(3)  
 C34B C33B C32B N2B 2(4)  
 C34B C33B C32B C37B -171(3)  
 C32B N2B C36B C35B 1(4)  
 Au3B N2B C36B C35B -180(2)  
 C32B N2B C36B C38B -174(3)  
 Au3B N2B C36B C38B 5(4)  
 C34B C35B C36B N2B 1(5)  
 C34B C35B C36B C38B 176(3)  
 N2B C32B C37B P3B -80(3)  
 C33B C32B C37B P3B 94(3)  
 C39B P3B C37B C32B 178.7(19)  
 C45B P3B C37B C32B -68(2)  
 Au2B P3B C37B C32B 53(2)  
 N2B C36B C38B P4B -82(3)  
 C35B C36B C38B P4B 103(3)  
 C51B P4B C38B C36B 171(2)  
 C57B P4B C38B C36B -76(2)  
 Au4B P4B C38B C36B 48(2)  
 C26B P2B C20B C21B -128.3(19)  
 C7B P2B C20B C21B 123.4(17)

Au3B P2B C20B C21B 7(2)  
 C26B P2B C20B C25B 49(2)  
 C7B P2B C20B C25B -59.0(19)  
 Au3B P2B C20B C25B -175.4(12)  
 C25B C20B C21B C22B 0.0  
 P2B C20B C21B C22B 178(2)  
 C20B C21B C22B C23B 0.0  
 C21B C22B C23B C24B 0.0  
 C22B C23B C24B C25B 0.0  
 C23B C24B C25B C20B 0.0  
 C21B C20B C25B C24B 0.0  
 P2B C20B C25B C24B -177(2)  
 C20B P2B C26B C27B -165.2(19)  
 C7B P2B C26B C27B -62(2)  
 Au3B P2B C26B C27B 55(2)  
 C20B P2B C26B C31B 12(2)  
 C7B P2B C26B C31B 115(2)  
 Au3B P2B C26B C31B -128.4(16)  
 C31B C26B C27B C28B 0.0  
 P2B C26B C27B C28B 177(3)  
 C26B C27B C28B C29B 0.0  
 C27B C28B C29B C30B 0.0  
 C28B C29B C30B C31B 0.0  
 C29B C30B C31B C26B 0.0  
 C27B C26B C31B C30B 0.0  
 P2B C26B C31B C30B -177(3)

-----

### Symetry operations

- 
- 1 'x, y, z'
  - 2 '-x, y+1/2, -z+1/2'
  - 3 '-x, -y, -z'
  - 4 'x, -y-1/2, z-1/2'

# Complex 5

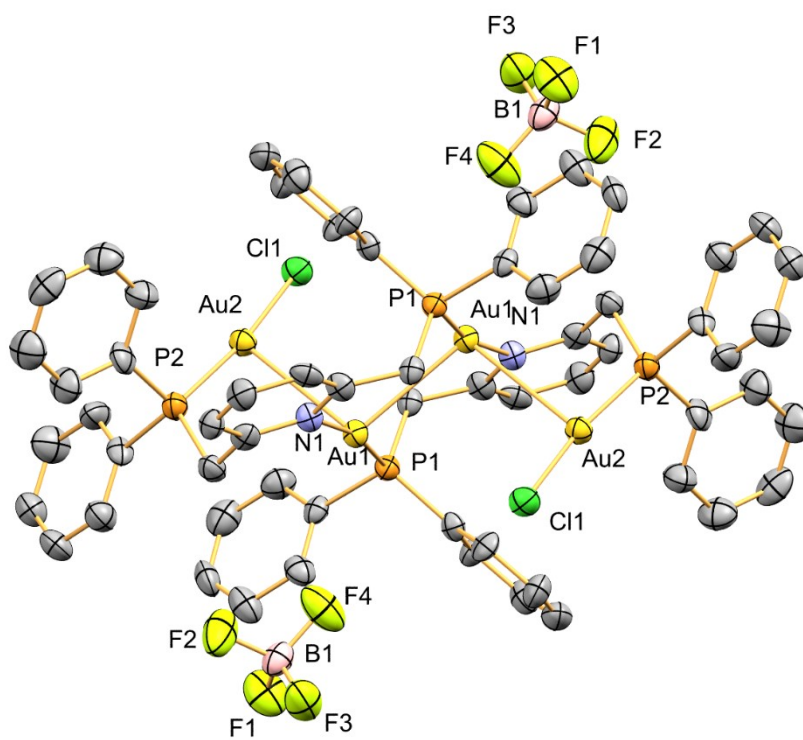

**Table 1.** Crystal data and structure refinement for **Complex 5**.

|                                   |                                                                                                                             |                  |
|-----------------------------------|-----------------------------------------------------------------------------------------------------------------------------|------------------|
| Identification code               | <b>Complex 5</b>                                                                                                            |                  |
| Empirical formula                 | C <sub>66</sub> H <sub>60</sub> Au <sub>4</sub> B <sub>2</sub> Cl <sub>2</sub> F <sub>8</sub> N <sub>4</sub> P <sub>4</sub> |                  |
| Formula weight                    | 2065.44                                                                                                                     |                  |
| Temperature                       | 150.0 K                                                                                                                     |                  |
| Wavelength                        | 0.71073 Å                                                                                                                   |                  |
| Crystal system                    | Monoclinic                                                                                                                  |                  |
| Space group                       | P2 <sub>1</sub> /n                                                                                                          |                  |
| Unit cell dimensions              | a = 15.1241(12) Å                                                                                                           | α = 90°.         |
|                                   | b = 10.3724(8) Å                                                                                                            | β = 101.162(3)°. |
|                                   | c = 20.8748(16) Å                                                                                                           | γ = 90°.         |
| Volume                            | 3212.8(4) Å <sup>3</sup>                                                                                                    |                  |
| Z                                 | 2                                                                                                                           |                  |
| Density (calculated)              | 2.135 Mg/m <sup>3</sup>                                                                                                     |                  |
| Absorption coefficient            | 9.356 mm <sup>-1</sup>                                                                                                      |                  |
| F(000)                            | 1952                                                                                                                        |                  |
| Crystal size                      | 0.17 x 0.06 x 0.04 mm <sup>3</sup>                                                                                          |                  |
| Theta range for data collection   | 0.994 to 25.027°.                                                                                                           |                  |
| Index ranges                      | -18 ≤ h ≤ 17, -12 ≤ k ≤ 12, 0 ≤ l ≤ 24                                                                                      |                  |
| Reflections collected             | 11200                                                                                                                       |                  |
| Independent reflections           | 5730 [R(int) = 0.0542]                                                                                                      |                  |
| Completeness to theta = 25.027°   | 99.8 %                                                                                                                      |                  |
| Absorption correction             | Semi-empirical from equivalents                                                                                             |                  |
| Max. and min. transmission        | 0.046758 and 0.012757                                                                                                       |                  |
| Refinement method                 | Full-matrix least-squares on F <sup>2</sup>                                                                                 |                  |
| Data / restraints / parameters    | 5730 / 16 / 360                                                                                                             |                  |
| Goodness-of-fit on F <sup>2</sup> | 1.126                                                                                                                       |                  |
| Final R indices [I > 2σ(I)]       | R1 = 0.0596, wR2 = 0.1272                                                                                                   |                  |
| R indices (all data)              | R1 = 0.0724, wR2 = 0.1329                                                                                                   |                  |
| Extinction coefficient            | n/a                                                                                                                         |                  |
| Largest diff. peak and hole       | 2.716 and -1.559 e.Å <sup>-3</sup>                                                                                          |                  |



**Table 2.** Atomic coordinates ( $\times 10^4$ ) and equivalent isotropic displacement parameters ( $\text{\AA}^2 \times 10^3$ ) for **Complex 5**.  $U(\text{eq})$  is defined as one third of the trace of the orthogonalized  $U^{ij}$  tensor.

|       | x        | y         | z       | $U(\text{eq})$ |
|-------|----------|-----------|---------|----------------|
| Au(1) | 5415(1)  | 5951(1)   | 4608(1) | 29(1)          |
| Au(2) | 7514(1)  | 5142(1)   | 5208(1) | 32(1)          |
| Cl(1) | 7486(3)  | 3080(4)   | 5609(2) | 40(1)          |
| P(1)  | 4663(3)  | 5751(4)   | 6073(2) | 28(1)          |
| P(2)  | 7789(3)  | 7094(4)   | 4836(2) | 33(1)          |
| N(1)  | 5627(7)  | 7748(12)  | 5096(6) | 29(3)          |
| C(1)  | 3832(6)  | 5438(10)  | 6578(5) | 30(3)          |
| C(6)  | 3025(7)  | 6113(10)  | 6511(5) | 46(4)          |
| C(5)  | 2411(6)  | 5807(11)  | 6904(6) | 53(5)          |
| C(4)  | 2604(7)  | 4827(12)  | 7364(5) | 47(5)          |
| C(3)  | 3411(8)  | 4153(10)  | 7431(5) | 48(5)          |
| C(2)  | 4025(6)  | 4458(10)  | 7038(5) | 41(4)          |
| C(7)  | 5713(5)  | 5982(9)   | 6638(4) | 29(3)          |
| C(8)  | 6448(6)  | 5188(9)   | 6618(5) | 35(4)          |
| C(9)  | 7258(5)  | 5393(10)  | 7050(5) | 44(4)          |
| C(10) | 7334(5)  | 6391(11)  | 7501(5) | 46(4)          |
| C(11) | 6600(7)  | 7185(9)   | 7521(5) | 45(4)          |
| C(12) | 5789(6)  | 6981(9)   | 7089(5) | 34(4)          |
| C(13) | 4375(10) | 7348(14)  | 5686(7) | 29(3)          |
| C(14) | 5151(10) | 8126(14)  | 5557(7) | 32(3)          |
| C(15) | 5350(11) | 9291(15)  | 5878(8) | 35(4)          |
| C(16) | 6020(11) | 10069(16) | 5728(8) | 40(4)          |
| C(17) | 6485(10) | 9685(15)  | 5277(7) | 33(4)          |
| C(18) | 6286(9)  | 8525(14)  | 4947(7) | 31(3)          |
| C(19) | 6808(10) | 8087(16)  | 4456(8) | 35(4)          |
| C(20) | 8389(7)  | 8108(10)  | 5482(4) | 40(4)          |
| C(25) | 8835(8)  | 9205(11)  | 5331(4) | 51(5)          |
| C(24) | 9250(8)  | 10024(9)  | 5826(6) | 60(5)          |
| C(23) | 9219(8)  | 9745(11)  | 6473(5) | 53(5)          |
| C(22) | 8773(9)  | 8648(12)  | 6624(4) | 55(5)          |
| C(21) | 8358(8)  | 7830(10)  | 6129(5) | 49(5)          |
| C(26) | 8501(6)  | 6958(11)  | 4233(4) | 34(4)          |
| C(31) | 9202(7)  | 6074(11)  | 4377(5) | 51(5)          |
| C(30) | 9809(7)  | 5938(11)  | 3959(6) | 59(5)          |

|       |          |           |          |       |
|-------|----------|-----------|----------|-------|
| C(29) | 9714(7)  | 6684(12)  | 3397(5)  | 44(4) |
| C(28) | 9012(8)  | 7567(11)  | 3253(4)  | 45(4) |
| C(27) | 8406(7)  | 7704(10)  | 3670(5)  | 46(4) |
| F(1)  | 4643(9)  | 1628(12)  | 7783(6)  | 74(4) |
| F(2)  | 4187(8)  | 306(17)   | 6930(6)  | 93(5) |
| F(3)  | 5607(7)  | 164(12)   | 7472(6)  | 68(3) |
| F(4)  | 5173(9)  | 1887(12)  | 6837(6)  | 76(4) |
| B(1)  | 4905(13) | 990(20)   | 7260(10) | 45(5) |
| N(2)  | 7840(15) | 10900(20) | 4039(10) | 76(5) |
| C(32) | 9129(15) | 12520(30) | 4339(12) | 80(6) |
| C(33) | 8431(16) | 11600(20) | 4164(12) | 68(5) |

**Table 3.** Bond lengths [Å] and angles [°] for **Complex 5**.

|               |            |
|---------------|------------|
| Au(1)-Au(1)#1 | 2.9905(12) |
| Au(1)-Au(2)   | 3.2881(9)  |
| Au(1)-P(1)#1  | 2.255(4)   |
| Au(1)-N(1)    | 2.119(12)  |
| Au(2)-Cl(1)   | 2.299(4)   |
| Au(2)-P(2)    | 2.237(4)   |
| P(1)-C(1)     | 1.820(8)   |
| P(1)-C(7)     | 1.802(8)   |
| P(1)-C(13)    | 1.857(16)  |
| P(2)-C(19)    | 1.853(16)  |
| P(2)-C(20)    | 1.811(9)   |
| P(2)-C(26)    | 1.813(8)   |
| N(1)-C(14)    | 1.367(13)  |
| N(1)-C(18)    | 1.363(13)  |
| C(1)-C(6)     | 1.3900     |
| C(1)-C(2)     | 1.3900     |
| C(6)-H(6)     | 0.9500     |
| C(6)-C(5)     | 1.3900     |
| C(5)-H(5)     | 0.9500     |
| C(5)-C(4)     | 1.3900     |
| C(4)-H(4)     | 0.9500     |
| C(4)-C(3)     | 1.3900     |
| C(3)-H(3)     | 0.9500     |

|              |         |
|--------------|---------|
| C(3)-C(2)    | 1.3900  |
| C(2)-H(2)    | 0.9500  |
| C(7)-C(8)    | 1.3900  |
| C(7)-C(12)   | 1.3900  |
| C(8)-H(8)    | 0.9500  |
| C(8)-C(9)    | 1.3900  |
| C(9)-H(9)    | 0.9500  |
| C(9)-C(10)   | 1.3900  |
| C(10)-H(10)  | 0.9500  |
| C(10)-C(11)  | 1.3900  |
| C(11)-H(11)  | 0.9500  |
| C(11)-C(12)  | 1.3900  |
| C(12)-H(12)  | 0.9500  |
| C(13)-H(13A) | 0.9900  |
| C(13)-H(13B) | 0.9900  |
| C(13)-C(14)  | 1.49(2) |
| C(14)-C(15)  | 1.39(2) |
| C(15)-H(15)  | 0.9500  |
| C(15)-C(16)  | 1.38(2) |
| C(16)-H(16)  | 0.9500  |
| C(16)-C(17)  | 1.34(2) |
| C(17)-H(17)  | 0.9500  |
| C(17)-C(18)  | 1.39(2) |
| C(18)-C(19)  | 1.48(2) |
| C(19)-H(19A) | 0.9900  |
| C(19)-H(19B) | 0.9900  |
| C(20)-C(25)  | 1.3900  |
| C(20)-C(21)  | 1.3900  |
| C(25)-H(25)  | 0.9500  |
| C(25)-C(24)  | 1.3900  |
| C(24)-H(24)  | 0.9500  |
| C(24)-C(23)  | 1.3900  |
| C(23)-H(23)  | 0.9500  |
| C(23)-C(22)  | 1.3900  |
| C(22)-H(22)  | 0.9500  |
| C(22)-C(21)  | 1.3900  |
| C(21)-H(21)  | 0.9500  |
| C(26)-C(31)  | 1.3900  |
| C(26)-C(27)  | 1.3900  |

|                      |            |
|----------------------|------------|
| C(31)-H(31)          | 0.9500     |
| C(31)-C(30)          | 1.3900     |
| C(30)-H(30)          | 0.9500     |
| C(30)-C(29)          | 1.3900     |
| C(29)-H(29)          | 0.9500     |
| C(29)-C(28)          | 1.3900     |
| C(28)-H(28)          | 0.9500     |
| C(28)-C(27)          | 1.3900     |
| C(27)-H(27)          | 0.9500     |
| F(1)-B(1)            | 1.40(2)    |
| F(2)-B(1)            | 1.37(2)    |
| F(3)-B(1)            | 1.37(2)    |
| F(4)-B(1)            | 1.39(3)    |
| N(2)-C(33)           | 1.14(3)    |
| C(32)-H(32A)         | 0.9800     |
| C(32)-H(32B)         | 0.9800     |
| C(32)-H(32C)         | 0.9800     |
| C(32)-C(33)          | 1.42(3)    |
|                      |            |
| Au(1)#1-Au(1)-Au(2)  | 95.71(3)   |
| P(1)#1-Au(1)-Au(1)#1 | 81.48(10)  |
| P(1)#1-Au(1)-Au(2)   | 88.22(10)  |
| N(1)-Au(1)-Au(1)#1   | 111.0(3)   |
| N(1)-Au(1)-Au(2)     | 89.8(3)    |
| N(1)-Au(1)-P(1)#1    | 167.5(3)   |
| Cl(1)-Au(2)-Au(1)    | 106.95(11) |
| P(2)-Au(2)-Au(1)     | 82.36(10)  |
| P(2)-Au(2)-Cl(1)     | 170.43(15) |
| C(1)-P(1)-Au(1)#1    | 105.6(4)   |
| C(1)-P(1)-C(13)      | 106.3(6)   |
| C(7)-P(1)-Au(1)#1    | 116.7(3)   |
| C(7)-P(1)-C(1)       | 105.3(5)   |
| C(7)-P(1)-C(13)      | 105.5(6)   |
| C(13)-P(1)-Au(1)#1   | 116.5(5)   |
| C(19)-P(2)-Au(2)     | 117.7(5)   |
| C(20)-P(2)-Au(2)     | 111.5(4)   |
| C(20)-P(2)-C(19)     | 103.9(7)   |
| C(20)-P(2)-C(26)     | 106.5(5)   |
| C(26)-P(2)-Au(2)     | 110.2(4)   |

|                   |           |
|-------------------|-----------|
| C(26)-P(2)-C(19)  | 106.3(6)  |
| C(14)-N(1)-Au(1)  | 122.6(9)  |
| C(18)-N(1)-Au(1)  | 117.4(9)  |
| C(18)-N(1)-C(14)  | 120.0(13) |
| C(6)-C(1)-P(1)    | 123.0(6)  |
| C(6)-C(1)-C(2)    | 120.0     |
| C(2)-C(1)-P(1)    | 117.0(6)  |
| C(1)-C(6)-H(6)    | 120.0     |
| C(1)-C(6)-C(5)    | 120.0     |
| C(5)-C(6)-H(6)    | 120.0     |
| C(6)-C(5)-H(5)    | 120.0     |
| C(4)-C(5)-C(6)    | 120.0     |
| C(4)-C(5)-H(5)    | 120.0     |
| C(5)-C(4)-H(4)    | 120.0     |
| C(5)-C(4)-C(3)    | 120.0     |
| C(3)-C(4)-H(4)    | 120.0     |
| C(4)-C(3)-H(3)    | 120.0     |
| C(2)-C(3)-C(4)    | 120.0     |
| C(2)-C(3)-H(3)    | 120.0     |
| C(1)-C(2)-H(2)    | 120.0     |
| C(3)-C(2)-C(1)    | 120.0     |
| C(3)-C(2)-H(2)    | 120.0     |
| C(8)-C(7)-P(1)    | 120.7(5)  |
| C(8)-C(7)-C(12)   | 120.0     |
| C(12)-C(7)-P(1)   | 119.3(5)  |
| C(7)-C(8)-H(8)    | 120.0     |
| C(7)-C(8)-C(9)    | 120.0     |
| C(9)-C(8)-H(8)    | 120.0     |
| C(8)-C(9)-H(9)    | 120.0     |
| C(8)-C(9)-C(10)   | 120.0     |
| C(10)-C(9)-H(9)   | 120.0     |
| C(9)-C(10)-H(10)  | 120.0     |
| C(11)-C(10)-C(9)  | 120.0     |
| C(11)-C(10)-H(10) | 120.0     |
| C(10)-C(11)-H(11) | 120.0     |
| C(10)-C(11)-C(12) | 120.0     |
| C(12)-C(11)-H(11) | 120.0     |
| C(7)-C(12)-H(12)  | 120.0     |
| C(11)-C(12)-C(7)  | 120.0     |

|                     |           |
|---------------------|-----------|
| C(11)-C(12)-H(12)   | 120.0     |
| P(1)-C(13)-H(13A)   | 108.3     |
| P(1)-C(13)-H(13B)   | 108.3     |
| H(13A)-C(13)-H(13B) | 107.4     |
| C(14)-C(13)-P(1)    | 115.8(10) |
| C(14)-C(13)-H(13A)  | 108.3     |
| C(14)-C(13)-H(13B)  | 108.3     |
| N(1)-C(14)-C(13)    | 120.9(13) |
| N(1)-C(14)-C(15)    | 119.7(14) |
| C(15)-C(14)-C(13)   | 119.3(13) |
| C(14)-C(15)-H(15)   | 120.0     |
| C(16)-C(15)-C(14)   | 120.0(15) |
| C(16)-C(15)-H(15)   | 120.0     |
| C(15)-C(16)-H(16)   | 120.1     |
| C(17)-C(16)-C(15)   | 119.7(16) |
| C(17)-C(16)-H(16)   | 120.1     |
| C(16)-C(17)-H(17)   | 119.6     |
| C(16)-C(17)-C(18)   | 120.8(15) |
| C(18)-C(17)-H(17)   | 119.6     |
| N(1)-C(18)-C(17)    | 119.8(13) |
| N(1)-C(18)-C(19)    | 119.2(13) |
| C(17)-C(18)-C(19)   | 121.0(13) |
| P(2)-C(19)-H(19A)   | 109.4     |
| P(2)-C(19)-H(19B)   | 109.4     |
| C(18)-C(19)-P(2)    | 111.4(11) |
| C(18)-C(19)-H(19A)  | 109.4     |
| C(18)-C(19)-H(19B)  | 109.4     |
| H(19A)-C(19)-H(19B) | 108.0     |
| C(25)-C(20)-P(2)    | 120.1(6)  |
| C(25)-C(20)-C(21)   | 120.0     |
| C(21)-C(20)-P(2)    | 119.8(6)  |
| C(20)-C(25)-H(25)   | 120.0     |
| C(24)-C(25)-C(20)   | 120.0     |
| C(24)-C(25)-H(25)   | 120.0     |
| C(25)-C(24)-H(24)   | 120.0     |
| C(25)-C(24)-C(23)   | 120.0     |
| C(23)-C(24)-H(24)   | 120.0     |
| C(24)-C(23)-H(23)   | 120.0     |
| C(22)-C(23)-C(24)   | 120.0     |

|                     |           |
|---------------------|-----------|
| C(22)-C(23)-H(23)   | 120.0     |
| C(23)-C(22)-H(22)   | 120.0     |
| C(21)-C(22)-C(23)   | 120.0     |
| C(21)-C(22)-H(22)   | 120.0     |
| C(20)-C(21)-H(21)   | 120.0     |
| C(22)-C(21)-C(20)   | 120.0     |
| C(22)-C(21)-H(21)   | 120.0     |
| C(31)-C(26)-P(2)    | 115.6(6)  |
| C(31)-C(26)-C(27)   | 120.0     |
| C(27)-C(26)-P(2)    | 124.4(6)  |
| C(26)-C(31)-H(31)   | 120.0     |
| C(26)-C(31)-C(30)   | 120.0     |
| C(30)-C(31)-H(31)   | 120.0     |
| C(31)-C(30)-H(30)   | 120.0     |
| C(29)-C(30)-C(31)   | 120.0     |
| C(29)-C(30)-H(30)   | 120.0     |
| C(30)-C(29)-H(29)   | 120.0     |
| C(30)-C(29)-C(28)   | 120.0     |
| C(28)-C(29)-H(29)   | 120.0     |
| C(29)-C(28)-H(28)   | 120.0     |
| C(27)-C(28)-C(29)   | 120.0     |
| C(27)-C(28)-H(28)   | 120.0     |
| C(26)-C(27)-H(27)   | 120.0     |
| C(28)-C(27)-C(26)   | 120.0     |
| C(28)-C(27)-H(27)   | 120.0     |
| F(2)-B(1)-F(1)      | 108.8(16) |
| F(2)-B(1)-F(3)      | 109.0(18) |
| F(2)-B(1)-F(4)      | 109.0(17) |
| F(3)-B(1)-F(1)      | 111.3(16) |
| F(3)-B(1)-F(4)      | 108.6(15) |
| F(4)-B(1)-F(1)      | 110.1(17) |
| H(32A)-C(32)-H(32B) | 109.5     |
| H(32A)-C(32)-H(32C) | 109.5     |
| H(32B)-C(32)-H(32C) | 109.5     |
| C(33)-C(32)-H(32A)  | 109.5     |
| C(33)-C(32)-H(32B)  | 109.5     |
| C(33)-C(32)-H(32C)  | 109.5     |
| N(2)-C(33)-C(32)    | 176(3)    |

Symmetry transformations used to generate equivalent atoms:

#1 -x+1,-y+1,-z+1

**Table 4.** Anisotropic displacement parameters ( $\text{\AA}^2 \times 10^3$ ) for **Complex 5**. The anisotropic displacement factor exponent takes the form:  $-2\pi^2 [ h^2 a^{*2} U^{11} + \dots + 2 h k a^* b^* U^{12} ]$

|       | U <sup>11</sup> | U <sup>22</sup> | U <sup>33</sup> | U <sup>23</sup> | U <sup>13</sup> | U <sup>12</sup> |
|-------|-----------------|-----------------|-----------------|-----------------|-----------------|-----------------|
| Au(1) | 31(1)           | 25(1)           | 30(1)           | -3(1)           | 8(1)            | -1(1)           |
| Au(2) | 33(1)           | 28(1)           | 36(1)           | 2(1)            | 7(1)            | 0(1)            |
| Cl(1) | 45(2)           | 27(2)           | 45(2)           | 3(2)            | 3(2)            | 1(2)            |
| P(1)  | 28(2)           | 31(2)           | 27(2)           | -2(2)           | 7(2)            | 0(2)            |
| P(2)  | 28(2)           | 35(2)           | 36(2)           | 3(2)            | 8(2)            | -1(2)           |
| N(1)  | 30(7)           | 25(7)           | 35(7)           | -2(6)           | 10(6)           | 4(5)            |
| C(1)  | 27(7)           | 33(8)           | 29(8)           | -11(7)          | 4(6)            | -2(7)           |
| C(6)  | 45(10)          | 46(11)          | 46(10)          | 0(9)            | 6(8)            | 10(9)           |
| C(5)  | 45(10)          | 61(13)          | 53(12)          | -15(10)         | 8(9)            | 2(10)           |
| C(4)  | 49(10)          | 48(11)          | 50(11)          | -5(9)           | 24(9)           | -21(9)          |
| C(3)  | 63(12)          | 37(10)          | 51(11)          | -8(9)           | 29(9)           | -7(9)           |
| C(2)  | 49(10)          | 45(10)          | 33(9)           | -4(8)           | 15(8)           | -5(8)           |
| C(7)  | 31(8)           | 21(7)           | 37(9)           | -1(7)           | 11(7)           | -2(6)           |
| C(8)  | 36(8)           | 33(9)           | 32(8)           | -14(7)          | -2(7)           | -6(7)           |
| C(9)  | 30(8)           | 51(11)          | 48(10)          | -6(9)           | 1(7)            | -4(8)           |
| C(10) | 43(10)          | 47(11)          | 44(10)          | 12(9)           | 0(8)            | -5(9)           |
| C(11) | 52(11)          | 39(10)          | 45(10)          | -9(8)           | 15(8)           | -11(9)          |
| C(12) | 27(8)           | 36(9)           | 37(9)           | -3(7)           | 1(7)            | 3(7)            |
| C(13) | 28(8)           | 28(8)           | 30(8)           | -8(7)           | 7(6)            | -2(6)           |
| C(14) | 38(9)           | 21(8)           | 39(9)           | 1(7)            | 9(7)            | 3(7)            |
| C(15) | 46(9)           | 26(8)           | 33(9)           | 9(7)            | 9(7)            | 10(7)           |
| C(16) | 46(9)           | 26(8)           | 45(10)          | -4(8)           | 5(8)            | -4(8)           |
| C(17) | 33(8)           | 29(8)           | 38(9)           | -4(7)           | 5(7)            | -5(7)           |
| C(18) | 33(8)           | 20(8)           | 39(9)           | 3(7)            | 3(7)            | 6(7)            |
| C(19) | 38(9)           | 32(9)           | 37(9)           | 8(7)            | 9(7)            | 0(7)            |
| C(20) | 34(9)           | 49(11)          | 41(9)           | -1(8)           | 21(7)           | -5(8)           |
| C(25) | 60(12)          | 41(11)          | 52(11)          | -6(9)           | 9(9)            | -14(10)         |
| C(24) | 71(13)          | 43(11)          | 67(14)          | -4(11)          | 12(11)          | -9(11)          |
| C(23) | 55(11)          | 39(11)          | 58(12)          | -23(9)          | -6(9)           | 2(9)            |
| C(22) | 67(13)          | 56(13)          | 41(11)          | -7(9)           | 7(9)            | 0(11)           |



|       |        |         |        |         |        |        |
|-------|--------|---------|--------|---------|--------|--------|
| C(21) | 56(11) | 56(12)  | 36(10) | 3(9)    | 10(8)  | -7(10) |
| C(26) | 37(9)  | 42(9)   | 24(8)  | -12(7)  | 14(7)  | -8(8)  |
| C(31) | 34(9)  | 73(14)  | 45(11) | 20(10)  | 5(8)   | 7(9)   |
| C(30) | 55(12) | 69(14)  | 59(13) | 3(11)   | 23(10) | 19(11) |
| C(29) | 48(10) | 40(10)  | 47(11) | 1(9)    | 18(8)  | -3(9)  |
| C(28) | 55(11) | 42(10)  | 42(10) | 9(8)    | 19(8)  | -4(9)  |
| C(27) | 45(10) | 47(11)  | 47(11) | 6(9)    | 14(8)  | 2(9)   |
| F(1)  | 95(9)  | 59(8)   | 77(8)  | -17(7)  | 43(7)  | 5(7)   |
| F(2)  | 54(7)  | 165(16) | 64(8)  | -32(9)  | 26(6)  | -25(9) |
| F(3)  | 55(7)  | 62(8)   | 91(9)  | 19(7)   | 23(6)  | 15(6)  |
| F(4)  | 99(10) | 55(7)   | 92(9)  | 9(7)    | 62(8)  | 16(7)  |
| B(1)  | 38(11) | 54(13)  | 43(11) | -14(10) | 6(9)   | 0(10)  |
| N(2)  | 98(13) | 61(11)  | 72(11) | 2(10)   | 18(11) | -3(8)  |
| C(32) | 54(11) | 88(14)  | 90(14) | 21(13)  | -3(11) | 10(8)  |
| C(33) | 70(12) | 65(12)  | 72(11) | 14(10)  | 22(10) | 10(8)  |

---

**Table 5.** Hydrogen coordinates ( $\times 10^4$ ) and isotropic displacement parameters ( $\text{\AA}^2 \times 10^{-3}$ ) for **Complex 5**.

|        | x     | y     | z    | U(eq) |
|--------|-------|-------|------|-------|
| H(6)   | 2893  | 6783  | 6197 | 55    |
| H(5)   | 1859  | 6268  | 6859 | 64    |
| H(4)   | 2184  | 4618  | 7633 | 57    |
| H(3)   | 3542  | 3483  | 7745 | 57    |
| H(2)   | 4576  | 3997  | 7083 | 49    |
| H(8)   | 6396  | 4506  | 6309 | 42    |
| H(9)   | 7761  | 4850  | 7037 | 53    |
| H(10)  | 7888  | 6531  | 7797 | 55    |
| H(11)  | 6651  | 7867  | 7830 | 53    |
| H(12)  | 5287  | 7523  | 7102 | 41    |
| H(13A) | 3951  | 7213  | 5267 | 35    |
| H(13B) | 4055  | 7857  | 5972 | 35    |
| H(15)  | 5024  | 9553  | 6202 | 42    |
| H(16)  | 6151  | 10874 | 5942 | 48    |
| H(17)  | 6956  | 10213 | 5181 | 40    |
| H(19A) | 7021  | 8847  | 4242 | 42    |
| H(19B) | 6412  | 7575  | 4116 | 42    |
| H(25)  | 8856  | 9395  | 4889 | 61    |
| H(24)  | 9555  | 10773 | 5722 | 72    |
| H(23)  | 9503  | 10305 | 6811 | 64    |
| H(22)  | 8752  | 8458  | 7066 | 66    |
| H(21)  | 8054  | 7080  | 6233 | 59    |
| H(31)  | 9267  | 5565  | 4761 | 61    |
| H(30)  | 10288 | 5334  | 4058 | 71    |
| H(29)  | 10129 | 6590  | 3112 | 53    |
| H(28)  | 8947  | 8077  | 2868 | 54    |
| H(27)  | 7926  | 8307  | 3571 | 55    |
| H(32A) | 9559  | 12443 | 4044 | 119   |
| H(32B) | 9441  | 12367 | 4789 | 119   |
| H(32C) | 8870  | 13391 | 4303 | 119   |

**Table 6.** Torsion angles [°] for **Complex 5**.

---

|                          |            |
|--------------------------|------------|
| Au(1)#1-P(1)-C(1)-C(6)   | -107.8(6)  |
| Au(1)#1-P(1)-C(1)-C(2)   | 70.9(6)    |
| Au(1)#1-P(1)-C(7)-C(8)   | 3.9(7)     |
| Au(1)#1-P(1)-C(7)-C(12)  | -177.1(5)  |
| Au(1)#1-P(1)-C(13)-C(14) | -94.5(11)  |
| Au(1)-N(1)-C(14)-C(13)   | -7(2)      |
| Au(1)-N(1)-C(14)-C(15)   | 177.3(11)  |
| Au(1)-N(1)-C(18)-C(17)   | -176.7(11) |
| Au(1)-N(1)-C(18)-C(19)   | 0.4(18)    |
| Au(2)-P(2)-C(19)-C(18)   | 69.3(12)   |
| Au(2)-P(2)-C(20)-C(25)   | 162.4(6)   |
| Au(2)-P(2)-C(20)-C(21)   | -21.4(8)   |
| Au(2)-P(2)-C(26)-C(31)   | -41.3(7)   |
| Au(2)-P(2)-C(26)-C(27)   | 141.5(6)   |
| P(1)-C(1)-C(6)-C(5)      | 178.7(8)   |
| P(1)-C(1)-C(2)-C(3)      | -178.7(8)  |
| P(1)-C(7)-C(8)-C(9)      | 178.9(8)   |
| P(1)-C(7)-C(12)-C(11)    | -178.9(8)  |
| P(1)-C(13)-C(14)-N(1)    | 68.4(17)   |
| P(1)-C(13)-C(14)-C(15)   | -116.1(14) |
| P(2)-C(20)-C(25)-C(24)   | 176.2(9)   |
| P(2)-C(20)-C(21)-C(22)   | -176.2(9)  |
| P(2)-C(26)-C(31)-C(30)   | -177.3(8)  |
| P(2)-C(26)-C(27)-C(28)   | 177.0(9)   |
| N(1)-C(14)-C(15)-C(16)   | 1(2)       |
| N(1)-C(18)-C(19)-P(2)    | -86.9(15)  |
| C(1)-P(1)-C(7)-C(8)      | 120.6(6)   |
| C(1)-P(1)-C(7)-C(12)     | -60.5(7)   |
| C(1)-P(1)-C(13)-C(14)    | 148.3(10)  |
| C(1)-C(6)-C(5)-C(4)      | 0.0        |
| C(6)-C(1)-C(2)-C(3)      | 0.0        |
| C(6)-C(5)-C(4)-C(3)      | 0.0        |
| C(5)-C(4)-C(3)-C(2)      | 0.0        |
| C(4)-C(3)-C(2)-C(1)      | 0.0        |
| C(2)-C(1)-C(6)-C(5)      | 0.0        |
| C(7)-P(1)-C(1)-C(6)      | 128.2(7)   |
| C(7)-P(1)-C(1)-C(2)      | -53.1(7)   |

|                         |            |
|-------------------------|------------|
| C(7)-P(1)-C(13)-C(14)   | 36.7(12)   |
| C(7)-C(8)-C(9)-C(10)    | 0.0        |
| C(8)-C(7)-C(12)-C(11)   | 0.0        |
| C(8)-C(9)-C(10)-C(11)   | 0.0        |
| C(9)-C(10)-C(11)-C(12)  | 0.0        |
| C(10)-C(11)-C(12)-C(7)  | 0.0        |
| C(12)-C(7)-C(8)-C(9)    | 0.0        |
| C(13)-P(1)-C(1)-C(6)    | 16.5(8)    |
| C(13)-P(1)-C(1)-C(2)    | -164.8(7)  |
| C(13)-P(1)-C(7)-C(8)    | -127.2(7)  |
| C(13)-P(1)-C(7)-C(12)   | 51.7(8)    |
| C(13)-C(14)-C(15)-C(16) | -175.0(15) |
| C(14)-N(1)-C(18)-C(17)  | 2(2)       |
| C(14)-N(1)-C(18)-C(19)  | 178.7(13)  |
| C(14)-C(15)-C(16)-C(17) | -1(2)      |
| C(15)-C(16)-C(17)-C(18) | 2(2)       |
| C(16)-C(17)-C(18)-N(1)  | -2(2)      |
| C(16)-C(17)-C(18)-C(19) | -179.0(15) |
| C(17)-C(18)-C(19)-P(2)  | 90.2(16)   |
| C(18)-N(1)-C(14)-C(13)  | 174.6(13)  |
| C(18)-N(1)-C(14)-C(15)  | -1(2)      |
| C(19)-P(2)-C(20)-C(25)  | -69.9(8)   |
| C(19)-P(2)-C(20)-C(21)  | 106.3(8)   |
| C(19)-P(2)-C(26)-C(31)  | -169.9(8)  |
| C(19)-P(2)-C(26)-C(27)  | 13.0(10)   |
| C(20)-P(2)-C(19)-C(18)  | -54.6(12)  |
| C(20)-P(2)-C(26)-C(31)  | 79.8(7)    |
| C(20)-P(2)-C(26)-C(27)  | -97.3(8)   |
| C(20)-C(25)-C(24)-C(23) | 0.0        |
| C(25)-C(20)-C(21)-C(22) | 0.0        |
| C(25)-C(24)-C(23)-C(22) | 0.0        |
| C(24)-C(23)-C(22)-C(21) | 0.0        |
| C(23)-C(22)-C(21)-C(20) | 0.0        |
| C(21)-C(20)-C(25)-C(24) | 0.0        |
| C(26)-P(2)-C(19)-C(18)  | -166.7(10) |
| C(26)-P(2)-C(20)-C(25)  | 42.1(8)    |
| C(26)-P(2)-C(20)-C(21)  | -141.7(7)  |
| C(26)-C(31)-C(30)-C(29) | 0.0        |
| C(31)-C(26)-C(27)-C(28) | 0.0        |

|                         |     |
|-------------------------|-----|
| C(31)-C(30)-C(29)-C(28) | 0.0 |
| C(30)-C(29)-C(28)-C(27) | 0.0 |
| C(29)-C(28)-C(27)-C(26) | 0.0 |
| C(27)-C(26)-C(31)-C(30) | 0.0 |

---

Symmetry transformations used to generate equivalent atoms:

#1 -x+1,-y+1,-z+1

**Table 7.** Hydrogen bonds for **Complex 5** [ $\text{\AA}$  and  $^\circ$ ].

| D-H...A              | d(D-H) | d(H...A) | d(D...A)  | $\angle(\text{DHA})$ |
|----------------------|--------|----------|-----------|----------------------|
| C(9)-H(9)...F(3)#2   | 0.95   | 2.50     | 3.197(14) | 129.9                |
| C(29)-H(29)...F(3)#3 | 0.95   | 2.45     | 3.199(15) | 136.0                |

---

Symmetry transformations used to generate equivalent atoms:

#1 -x+1,-y+1,-z+1 #2 -x+3/2,y+1/2,-z+3/2 #3 x+1/2,-y+1/2,z-1/2
